# Supplementary material
Source: PubMed Central journal article supplement (PMC2553255)
Supplement: NIHMS62329-supplement-si20070312_010.pdf [file NIHMS62329-supplement-si20070312_010.pdf]

# Investigation of the Regioselectivity for Staudinger Reaction and Its Application for the Synthesis of Aminoglycosides with N-1 Modification

*Jie Li, Fang-I Chiang, Hsiao-Nung Chen and Cheng-Wei Tom Chang\**

Department of Chemistry and Biochemistry, Utah State University, 0300 Old Main Hill, Logan,

Utah 84322-0300, U.S.A.

Tel: +4357973545. Fax: +4357973390. Email: chang@cc.usu.edu

## **Supporting Information**

I. General Experimental Procedures (S2)

II.  $^1\text{H}$  NMR,  $^{13}\text{C}$  NMR and  $^1\text{H}$ - $^1\text{H}$  COSY Spectra for the Synthesized Compounds (S3-S70)

---

## I. General Experimental Procedures

**General Procedure for Selective Staudinger Reaction.** To a solution of polyazido starting material and BOC-ON ([2-(tert-butoxycarbonyloxyimino)-2-phenylacetonitrile]) (2.4 equiv.) in anhydrous toluene at  $-78^{\circ}\text{C}$  under atmospheric nitrogen, trimethylphosphine (1.0 M solution in toluene, 1.1 equiv.) was added. The reaction was kept at  $-78^{\circ}\text{C}$  for 30 minutes, then was stirred overnight allowing the temperature to warm up to room temperature. The reaction was quenched with phosphate buffer ( $p\text{H} = 7$ ) and then was concentrated. The residue was re-dissolved with EtOAc. The organic solution was washed with saturated  $\text{NaHCO}_{3(\text{aq})}$ , water and brine, then dried over anhydrous  $\text{Na}_2\text{SO}_4$ . Removal of the solvent followed by purification with a gradient column chromatography (Hexanes:EtOAc = 100:0 to 40:60) usually afforded multiple components, which were characterized by  $^1\text{H}$ ,  $^{13}\text{C}$  and  $^1\text{H}$ - $^1\text{H}$  COSY NMR.

**General Procedure for Glycosylation and Hydrolysis:** A solution of phenylthioglycosyl donor (1 equiv.), neamine derivative (1.2 equiv.), and activated powder  $4\text{A}^{\circ}$  molecular sieve was mixed together in anhydrous  $\text{CH}_2\text{Cl}_2$  at room temperature first. N-iodosuccinimide (1.2 equiv.) was quickly added into above solution and the reaction mixture was stirred for 3 hrs at room temperature. Trimethylsilyl triflate (0.15 equiv.) was added. The reaction solution was stirred till the consumption of the glycosyl donor (ca. 48 hrs, monitored by TLC, Hexane: EtOAc = 65: 35). The reaction mixture was quenched by the addition of  $\text{Na}_2\text{SO}_4\cdot 10\text{H}_2\text{O}_{(\text{s})}$ ,  $\text{NaHCO}_{3(\text{s})}$ ,  $\text{Na}_2\text{S}_2\text{O}_3_{(\text{s})}$ . After being stirred for 5 mins, the reaction mixture changed color from dark brown to colorless. Then the reaction mixture was filtered through Celite and the solvent was removed. The crude product was extracted with EtOAc, washed with  $\text{H}_2\text{O}$ , brine and dried over anhydrous  $\text{Na}_2\text{SO}_4$ . After removal of the solvents, the crude product was purified with column chromatography. The glycosylated compounds were often mixed with inseparable impurities, and were fully characterized after hydrolysis. The glycosylated product was dissolved in tetrahydrofuran (3 mL) and  $\text{H}_2\text{O}$  (1 mL) and  $\text{LiOH}\cdot\text{H}_2\text{O}$  was added. The reaction mixture was stirred at room temperature till the completion of the reaction (ca. 24 hrs, monitored by TLC, EtOAc: Hexane = 65: 35). The solvent was removed and the residue was purified via column chromatography to provide the product as colorless oil.

## II. <sup>1</sup>H NMR and <sup>13</sup>C NMR Spectra for the Synthesized Compounds

| Entry | Compound Name                                                                                                                                                             | Page |
|-------|---------------------------------------------------------------------------------------------------------------------------------------------------------------------------|------|
| 1     | <sup>1</sup> H NMR of 3',4',5,6-Tetra- <i>O</i> -benzyl-1,3,2',6'-tetraazidoneamine (2)                                                                                   | S6   |
| 2     | <sup>1</sup> H- <sup>1</sup> H COSY of 3',4',5,6-Tetra- <i>O</i> -benzyl-1,3,2',6'-tetraazidoneamine (2)                                                                  | S7   |
| 3     | <sup>1</sup> H NMR of 3',4',5,6-Tetra- <i>O</i> -acetyl-1,3,2',6'-tetraazidoneamine (3)                                                                                   | S8   |
| 4     | <sup>13</sup> C NMR of 3',4',5,6-Tetra- <i>O</i> -acetyl-1,3,2',6'-tetraazidoneamine (3)                                                                                  | S9   |
| 5     | <sup>1</sup> H- <sup>1</sup> H COSY of 3',4',5,6-Tetra- <i>O</i> -acetyl-1,3,2',6'-tetraazidoneamine (3)                                                                  | S10  |
| 6     | <sup>1</sup> H NMR of 3',4',6-Tri- <i>O</i> -acetyl-1,3,2',6'-tetraazidoneamine (4)                                                                                       | S11  |
| 7     | <sup>1</sup> H- <sup>1</sup> H COSY of 3',4',6-Tri- <i>O</i> -acetyl-1,3,2',6'-tetraazidoneamine (4)                                                                      | S12  |
| 8     | <sup>1</sup> H NMR of 3',4',5,6-Tetra- <i>O</i> -acetyl-2'- <i>N</i> - <i>tert</i> -butoxycarbonyl-1,3,6'-triazidoneamine (8)                                             | S13  |
| 9     | <sup>13</sup> C NMR of 3',4',5,6-Tetra- <i>O</i> -acetyl-2'- <i>N</i> - <i>tert</i> -butoxycarbonyl-1,3,6'-triazidoneamine (8)                                            | S14  |
| 10    | <sup>1</sup> H- <sup>1</sup> H COSY of 3',4',5,6-Tetra- <i>O</i> -acetyl-2'- <i>N</i> - <i>tert</i> -butoxycarbonyl-1,3,6'-triazidoneamine (8)                            | S15  |
| 11    | <sup>1</sup> H NMR of 3',4'-Di- <i>O</i> -acetyl-5,6- <i>O</i> -Cyclohexylidene-1- <i>N</i> - <i>tert</i> -butoxycarbonyl-3,2',6'-triazidoneamine (11)                    | S16  |
| 12    | <sup>13</sup> C NMR of 3',4'-Di- <i>O</i> -acetyl-5,6- <i>O</i> -Cyclohexylidene-1- <i>N</i> - <i>tert</i> -butoxycarbonyl-3,2',6'-triazidoneamine (11)                   | S17  |
| 13    | <sup>1</sup> H- <sup>1</sup> H COSY of 3',4'-Di- <i>O</i> -acetyl-5,6- <i>O</i> -Cyclohexylidene-1- <i>N</i> - <i>tert</i> -butoxycarbonyl-3,2',6'-triazidoneamine (11)   | S18  |
| 14    | <sup>1</sup> H NMR of 3',4'-Di- <i>O</i> -acetyl-5,6- <i>O</i> -Cyclohexylidene-3- <i>N</i> - <i>tert</i> -butoxycarbonyl-1,2',6'-triazidoneamine (12)                    | S19  |
| 15    | <sup>13</sup> C NMR of 3',4'-Di- <i>O</i> -acetyl-5,6- <i>O</i> -Cyclohexylidene-3- <i>N</i> - <i>tert</i> -butoxycarbonyl-1,2',6'-triazidoneamine (12)                   | S20  |
| 16    | <sup>1</sup> H- <sup>1</sup> H COSY of 3',4'-Di- <i>O</i> -acetyl-5,6- <i>O</i> -Cyclohexylidene-3- <i>N</i> - <i>tert</i> -butoxycarbonyl-1,2',6'-triazidoneamine (12)   | S21  |
| 17    | <sup>1</sup> H NMR of 3',4'-Di- <i>O</i> -acetyl-1- <i>N</i> -[( <i>S</i> )-4-(benzyloxycarbonylamino)-2-benzyloxybutanoyl]-3,2',6'-triazidoneamine (14)                  | S22  |
| 18    | <sup>13</sup> C NMR of 3',4'-Di- <i>O</i> -acetyl-1- <i>N</i> -[( <i>S</i> )-4-(benzyloxycarbonylamino)-2-benzyloxybutanoyl]-3,2',6'-triazidoneamine (14)                 | S23  |
| 19    | <sup>1</sup> H- <sup>1</sup> H COSY of 3',4'-Di- <i>O</i> -acetyl-1- <i>N</i> -[( <i>S</i> )-4-(benzyloxycarbonylamino)-2-benzyloxybutanoyl]-3,2',6'-triazidoneamine (14) | S24  |
| 20    | <sup>1</sup> H NMR of 3',4'-Di- <i>O</i> -acetyl-3- <i>N</i> -[( <i>S</i> )-4-(benzyloxycarbonylamino)-2-benzyloxybutanoyl]-1,2',6'-triazidoneamine (15)                  | S25  |
| 21    | <sup>13</sup> C NMR of 3',4'-Di- <i>O</i> -acetyl-3- <i>N</i> -[( <i>S</i> )-4-(benzyloxycarbonylamino)-2-benzyloxybutanoyl]-1,2',6'-triazidoneamine (15)                 | S26  |
| 22    | <sup>1</sup> H- <sup>1</sup> H COSY of 3',4'-Di- <i>O</i> -acetyl-3- <i>N</i> -[( <i>S</i> )-4-(benzyloxycarbonylamino)-2-benzyloxybutanoyl]-1,2',6'-triazidoneamine (15) | S27  |
| 23    | <sup>1</sup> H NMR of 3',4',5,6-Tetra- <i>O</i> -acetyl-1- <i>N</i> -[( <i>S</i> )-4-(benzyloxycarbonylamino)-2-benzyloxybutanoyl]-3,2',6'-triazidoneamine (16)           | S28  |

|    |                                                                                                                                                                                                             |     |
|----|-------------------------------------------------------------------------------------------------------------------------------------------------------------------------------------------------------------|-----|
| 24 | <sup>13</sup> C NMR of 3',4',5,6-Tetra- <i>O</i> -acetyl-1- <i>N</i> -[( <i>S</i> )-4-(benzyloxycarbonylamino)-2-benzyloxybutanoyl]-3,2',6'-triazidoneamine (16)                                            | S29 |
| 25 | <sup>1</sup> H- <sup>1</sup> H COSY of 3',4',5,6-Tetra- <i>O</i> -acetyl-1- <i>N</i> -[( <i>S</i> )-4-(benzyloxycarbonylamino)-2-benzyloxybutanoyl]-3,2',6'-triazidoneamine (16)                            | S30 |
| 26 | <sup>1</sup> H NMR of 3',4',5,6-Tetra- <i>O</i> -acetyl-3- <i>N</i> -[( <i>S</i> )-4-(benzyloxycarbonylamino)-2-benzyloxybutanoyl]-1,2',6'-triazidoneamine (17)                                             | S31 |
| 27 | <sup>13</sup> C NMR of 3',4',5,6-Tetra- <i>O</i> -acetyl-3- <i>N</i> -[( <i>S</i> )-4-(benzyloxycarbonylamino)-2-benzyloxybutanoyl]-1,2',6'-triazidoneamine (17)                                            | S32 |
| 28 | <sup>1</sup> H- <sup>1</sup> H COSY of 3',4',5,6-Tetra- <i>O</i> -acetyl-3- <i>N</i> -[( <i>S</i> )-4-(benzyloxycarbonylamino)-2-benzyloxybutanoyl]-1,2',6'-triazidoneamine (17)                            | S33 |
| 29 | <sup>1</sup> H NMR of 3',4',6-Tri- <i>O</i> -acetyl-2'- <i>N</i> - <i>tert</i> -butoxycarbonyl-1,3,6'-triazidoneamine (18)                                                                                  | S34 |
| 30 | <sup>13</sup> C NMR of 3',4',6-Tri- <i>O</i> -acetyl-2'- <i>N</i> - <i>tert</i> -butoxycarbonyl-1,3,6'-triazidoneamine (18)                                                                                 | S35 |
| 31 | <sup>1</sup> H- <sup>1</sup> H COSY of 3',4',6-Tri- <i>O</i> -acetyl-2'- <i>N</i> - <i>tert</i> -butoxycarbonyl-1,3,6'-triazidoneamine (18)                                                                 | S36 |
| 32 | <sup>1</sup> H NMR of 3',4',6-Tri- <i>O</i> -acetyl-1,3,6'-triazidoneamine (19)                                                                                                                             | S37 |
| 33 | <sup>13</sup> C NMR of 3',4',6-Tri- <i>O</i> -acetyl-1,3,6'-triazidoneamine (19)                                                                                                                            | S38 |
| 34 | <sup>1</sup> H- <sup>1</sup> H COSY of 3',4',6-Tri- <i>O</i> -acetyl-1,3,6'-triazidoneamine (19)                                                                                                            | S39 |
| 35 | <sup>1</sup> H NMR of 3',4',6,2'',5'',3''',4'''-Hepta- <i>O</i> -acetyl-1- <i>N</i> - <i>tert</i> -butoxycarbonyl-3,2',6',2''',6'''-pentaazidoneomycin (21)                                                 | S40 |
| 36 | <sup>13</sup> C NMR of 3',4',6,2'',5'',3''',4'''-Hepta- <i>O</i> -acetyl-1- <i>N</i> - <i>tert</i> -butoxycarbonyl-3,2',6',2''',6'''-pentaazidoneomycin (21)                                                | S41 |
| 37 | <sup>1</sup> H- <sup>1</sup> H COSY of 3',4',6,2'',5'',3''',4'''-Hepta- <i>O</i> -acetyl-1- <i>N</i> - <i>tert</i> -butoxycarbonyl-3,2',6',2''',6'''-pentaazidoneomycin (21)                                | S42 |
| 38 | <sup>1</sup> H NMR of 3',4',6,2'',5'',3''',4'''-Hepta- <i>O</i> -acetyl-1- <i>N</i> -[( <i>S</i> )-4-(benzyloxycarbonylamino)-2-hydroxybutanoyl]-3,2',6',2''',6'''-pentaazidoneomycin (23)                  | S43 |
| 39 | <sup>13</sup> C NMR of 3',4',6,2'',5'',3''',4'''-Hepta- <i>O</i> -acetyl-1- <i>N</i> -[( <i>S</i> )-4-(benzyloxycarbonylamino)-2-hydroxybutanoyl]-3,2',6',2''',6'''-pentaazidoneomycin (23)                 | S44 |
| 40 | <sup>1</sup> H- <sup>1</sup> H COSY of 3',4',6,2'',5'',3''',4'''-Hepta- <i>O</i> -acetyl-1- <i>N</i> -[( <i>S</i> )-4-(benzyloxycarbonylamino)-2-hydroxybutanoyl]-3,2',6',2''',6'''-pentaazidoneomycin (23) | S45 |
| 41 | <sup>1</sup> H NMR of 1- <i>N</i> -[( <i>S</i> )-4-amino-2-hydroxybutanoyl]neomycin (neokacin)                                                                                                              | S46 |
| 42 | <sup>13</sup> C NMR of 1- <i>N</i> -[( <i>S</i> )-4-amino-2-hydroxybutanoyl]neomycin (neokacin)                                                                                                             | S47 |
| 43 | <sup>1</sup> H NMR of 5- <i>O</i> -(2,3,5-Tri- <i>O</i> -acetyl-β- <i>D</i> -ribofuranosyl)-6,3',4'-Tri- <i>O</i> -acetyl-1,3,2',6'-tetraazidoneamine (25)                                                  | S48 |
| 44 | <sup>13</sup> C NMR of 5- <i>O</i> -(2,3,5-Tri- <i>O</i> -acetyl-β- <i>D</i> -ribofuranosyl)-6,3',4'-Tri- <i>O</i> -acetyl-1,3,2',6'-tetraazidoneamine (25)                                                 | S49 |
| 45 | <sup>1</sup> H- <sup>1</sup> H COSY of 5- <i>O</i> -(2,3,5-Tri- <i>O</i> -acetyl-β- <i>D</i> -ribofuranosyl)-6,3',4'-Tri- <i>O</i> -acetyl-1,3,2',6'-tetraazidoneamine (25)                                 | S50 |
| 46 | <sup>1</sup> H NMR of 5- <i>O</i> -(2,3,5-Tri- <i>O</i> -acetyl-β- <i>D</i> -ribofuranosyl)-1- <i>N</i> - <i>tert</i> -butoxycarbonyl-6,3',4'-Tri- <i>O</i> -acetyl-3,2',6'-triazidoneamine (26)            | S51 |

|    |                                                                                                                                                                                                                                                                                                           |     |
|----|-----------------------------------------------------------------------------------------------------------------------------------------------------------------------------------------------------------------------------------------------------------------------------------------------------------|-----|
| 47 | <sup>13</sup> C NMR of 5- <i>O</i> -(2,3,5-Tri- <i>O</i> -acetyl- <i>D</i> -ribofuranosyl)-1- <i>N</i> - <i>tert</i> -butoxycarbonyl-6,3',4'-Tri- <i>O</i> -acetyl-3,2',6'-triazidoneamine (26)                                                                                                           | S52 |
| 48 | <sup>1</sup> H- <sup>1</sup> H COSY of 5- <i>O</i> -(2,3,5-Tri- <i>O</i> -acetyl- <i>D</i> -ribofuranosyl)-1- <i>N</i> - <i>tert</i> -butoxycarbonyl-6,3',4'-Tri- <i>O</i> -acetyl-3,2',6'-triazidoneamine (26)                                                                                           | S53 |
| 49 | <sup>1</sup> H NMR of 5- <i>O</i> -(2,3,5-Tri- <i>O</i> -acetyl- $\beta$ - <i>D</i> -ribofuranosyl)-1- <i>N</i> -[( <i>S</i> )-4-(benzyloxycarbonylamino)-2-hydroxybutanoyl]-6,3',4'-Tri- <i>O</i> -acetyl-3,2',6'-triazidoneamine (27)                                                                   | S54 |
| 50 | <sup>13</sup> C NMR of 5- <i>O</i> -(2,3,5-Tri- <i>O</i> -acetyl- $\beta$ - <i>D</i> -ribofuranosyl)-1- <i>N</i> -[( <i>S</i> )-4-(benzyloxycarbonylamino)-2-hydroxybutanoyl]-6,3',4'-Tri- <i>O</i> -acetyl-3,2',6'-triazidoneamine (27)                                                                  | S55 |
| 51 | <sup>1</sup> H- <sup>1</sup> H COSY of 5- <i>O</i> -(2,3,5-Tri- <i>O</i> -acetyl- $\beta$ - <i>D</i> -ribofuranosyl)-1- <i>N</i> -[( <i>S</i> )-4-(benzyloxycarbonylamino)-2-hydroxybutanoyl]-6,3',4'-Tri- <i>O</i> -acetyl-3,2',6'-triazidoneamine (27)                                                  | S56 |
| 52 | <sup>1</sup> H NMR of 5- <i>O</i> -( $\beta$ - <i>D</i> -ribofuranosyl)-1- <i>N</i> -[( <i>S</i> )-4-amino-2-hydroxybutanoyl]neamine (Butirosin B)                                                                                                                                                        | S57 |
| 53 | <sup>13</sup> C NMR of 5- <i>O</i> -( $\beta$ - <i>D</i> -ribofuranosyl)-1- <i>N</i> -[( <i>S</i> )-4-amino-2-hydroxybutanoyl]neamine (Butirosin B)                                                                                                                                                       | S58 |
| 54 | <sup>1</sup> H NMR of 6- <i>O</i> -(3-Azido-2,4,6-tri- <i>O</i> -benzyl-3-deoxy- $\alpha$ - <i>D</i> -glucopyranosyl)-1- <i>N</i> -[( <i>S</i> )-4-(benzyloxycarbonylamino)-2-benzyloxybutanoyl]-3,2'6'-triazidoneamine (29a)                                                                             | S59 |
| 55 | <sup>13</sup> C NMR of 6- <i>O</i> -(3-Azido-2,4,6-tri- <i>O</i> -benzyl-3-deoxy- $\alpha$ - <i>D</i> -glucopyranosyl)-1- <i>N</i> -[( <i>S</i> )-4-(benzyloxycarbonylamino)-2-benzyloxybutanoyl]-3,2'6'-triazidoneamine (29a)                                                                            | S60 |
| 56 | <sup>1</sup> H NMR of 6- <i>O</i> -(4- <i>O</i> -(( <i>R</i> )-3-Azido-2-(( <i>R</i> )-3-azido-2-benzyloxypropoxy)propyl)-2,3-di- <i>O</i> -benzyl-6-deoxy- $\alpha$ - <i>D</i> -glucopyranosyl)-1- <i>N</i> -[( <i>S</i> )-4-(benzyloxycarbonylamino)-2-benzyloxybutanoyl]-3,2'6'-triazidoneamine (29b)  | S61 |
| 57 | <sup>13</sup> C NMR of 6- <i>O</i> -(4- <i>O</i> -(( <i>R</i> )-3-Azido-2-(( <i>R</i> )-3-azido-2-benzyloxypropoxy)propyl)-2,3-di- <i>O</i> -benzyl-6-deoxy- $\alpha$ - <i>D</i> -glucopyranosyl)-1- <i>N</i> -[( <i>S</i> )-4-(benzyloxycarbonylamino)-2-benzyloxybutanoyl]-3,2'6'-triazidoneamine (29b) | S62 |
| 58 | <sup>1</sup> H NMR of 6- <i>O</i> -(3-Azido-2,4-di- <i>O</i> -benzyl-3-deoxy- $\alpha$ - <i>D</i> -xylopyranosyl)-1- <i>N</i> -[( <i>S</i> )-4-(benzyloxycarbonylamino)-2-benzyloxybutanoyl]-3,2'6'-triazidoneamine (29c)                                                                                 | S63 |
| 59 | <sup>13</sup> C NMR of 6- <i>O</i> -(3-Azido-2,4-di- <i>O</i> -benzyl-3-deoxy- $\alpha$ - <i>D</i> -xylopyranosyl)-1- <i>N</i> -[( <i>S</i> )-4-(benzyloxycarbonylamino)-2-benzyloxybutanoyl]-3,2'6'-triazidoneamine (29c)                                                                                | S64 |
| 60 | <sup>1</sup> H NMR of 6- <i>O</i> -(3-Amino-3-deoxy- $\beta$ - <i>D</i> -glucopyranosyl)-1- <i>N</i> -[( <i>S</i> )-4-amino-2-hydroxybutanoyl]neamine (JLN007)                                                                                                                                            | S65 |
| 61 | <sup>13</sup> C NMR of 6- <i>O</i> -(3-Amino-3-deoxy- $\beta$ - <i>D</i> -glucopyranosyl)-1- <i>N</i> -[( <i>S</i> )-4-amino-2-hydroxybutanoyl]neamine (JLN007)                                                                                                                                           | S66 |
| 62 | <sup>1</sup> H NMR of 6- <i>O</i> -(4- <i>O</i> -(( <i>R</i> )-3-Amino-2-(( <i>R</i> )-3-Amino-2-hydroxypropoxy)propyl)-6-deoxy- $\alpha$ - <i>D</i> -glucopyranosyl)-1- <i>N</i> -[( <i>S</i> )-4-amino-2-hydroxybutanoyl]neamine (JLN033)                                                               | S67 |
| 63 | <sup>13</sup> C NMR of 6- <i>O</i> -(4- <i>O</i> -(( <i>R</i> )-3-Amino-2-(( <i>R</i> )-3-Amino-2-hydroxypropoxy)propyl)-6-deoxy- $\alpha$ - <i>D</i> -glucopyranosyl)-1- <i>N</i> -[( <i>S</i> )-4-amino-2-hydroxybutanoyl]neamine (JLN033)                                                              | S68 |
| 64 | <sup>1</sup> H NMR of 6- <i>O</i> -(3-Amino-3-deoxy- $\alpha$ - <i>D</i> -xylopyranosyl)-1- <i>N</i> -[( <i>S</i> )-4-amino-2-hydroxybutanoyl]neamine (JLN040)                                                                                                                                            | S69 |
| 65 | <sup>13</sup> C NMR of 6- <i>O</i> -(3-Amino-3-deoxy- $\alpha$ - <i>D</i> -xylopyranosyl)-1- <i>N</i> -[( <i>S</i> )-4-amino-2-hydroxybutanoyl]neamine (JLN040)                                                                                                                                           | S70 |

# Standard Proton Experiment

Current Data Parameters  
 NAME 011006-3  
 EXPNO 1  
 PROCNO 1

F2 - Acquisition Parameters  
 Date\_ 500000  
 Time 17.27  
 INSTRUM arx400  
 PROBHD 5 mm Multinuc1  
 PULPROG zg  
 TD 32768  
 SOLVENT COC13  
 NS 8  
 DS 0  
 SMH 7246.377 Hz  
 FIDRES 0.221142 Hz  
 AQ 2.2610421 sec  
 RG 128  
 DW 69.000 usec  
 DE 98.57 usec  
 TE 298.0 K  
 D1 1.00000000 sec  
 P1 4.00 usec  
 DE 98.57 usec  
 SF01 400.1328371 MHz  
 NUCLEUS 1H

F2 - Processing parameters  
 SI 16384  
 SF 400.1300049 MHz  
 NDM EM  
 SSB 0  
 LB 0.10 Hz  
 GB 0  
 PC 1.00

1D NMR plot parameters  
 CX 20.00 cm  
 F1P 9.201 ppm  
 F1 3681.42 Hz  
 F2P -0.505 ppm  
 F2 -202.10 Hz  
 PPMCH 0.46528 ppm/cm  
 HZCM 194.17558 Hz/cm

3',4',5,6-Tetra-O-benzyl-1,3,2',6'-tetraazidoneamine (2)

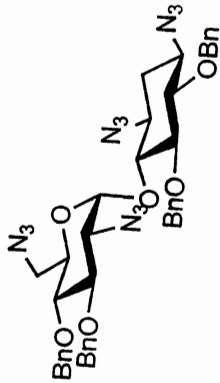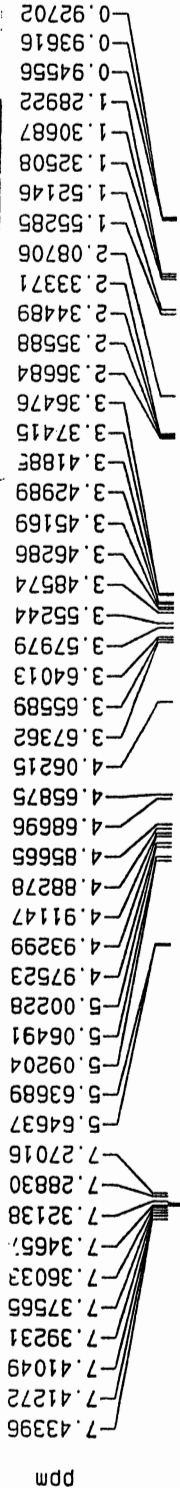

3',4',5,6-Tetra-O-benzyl-1,3,2',6'-tetraazidoneamine (2)

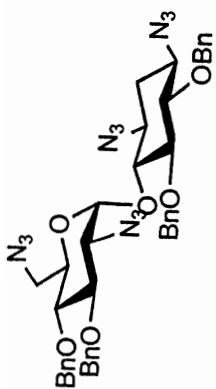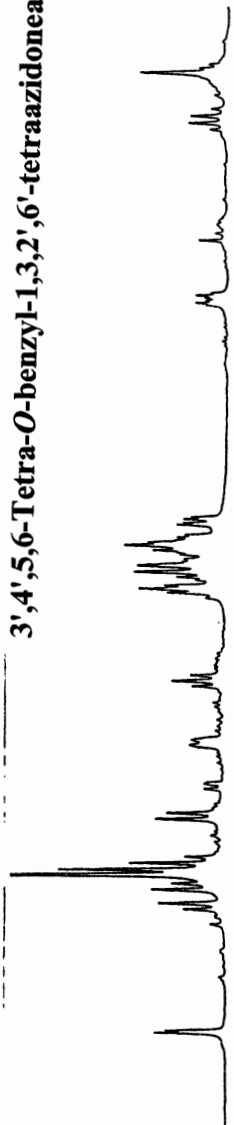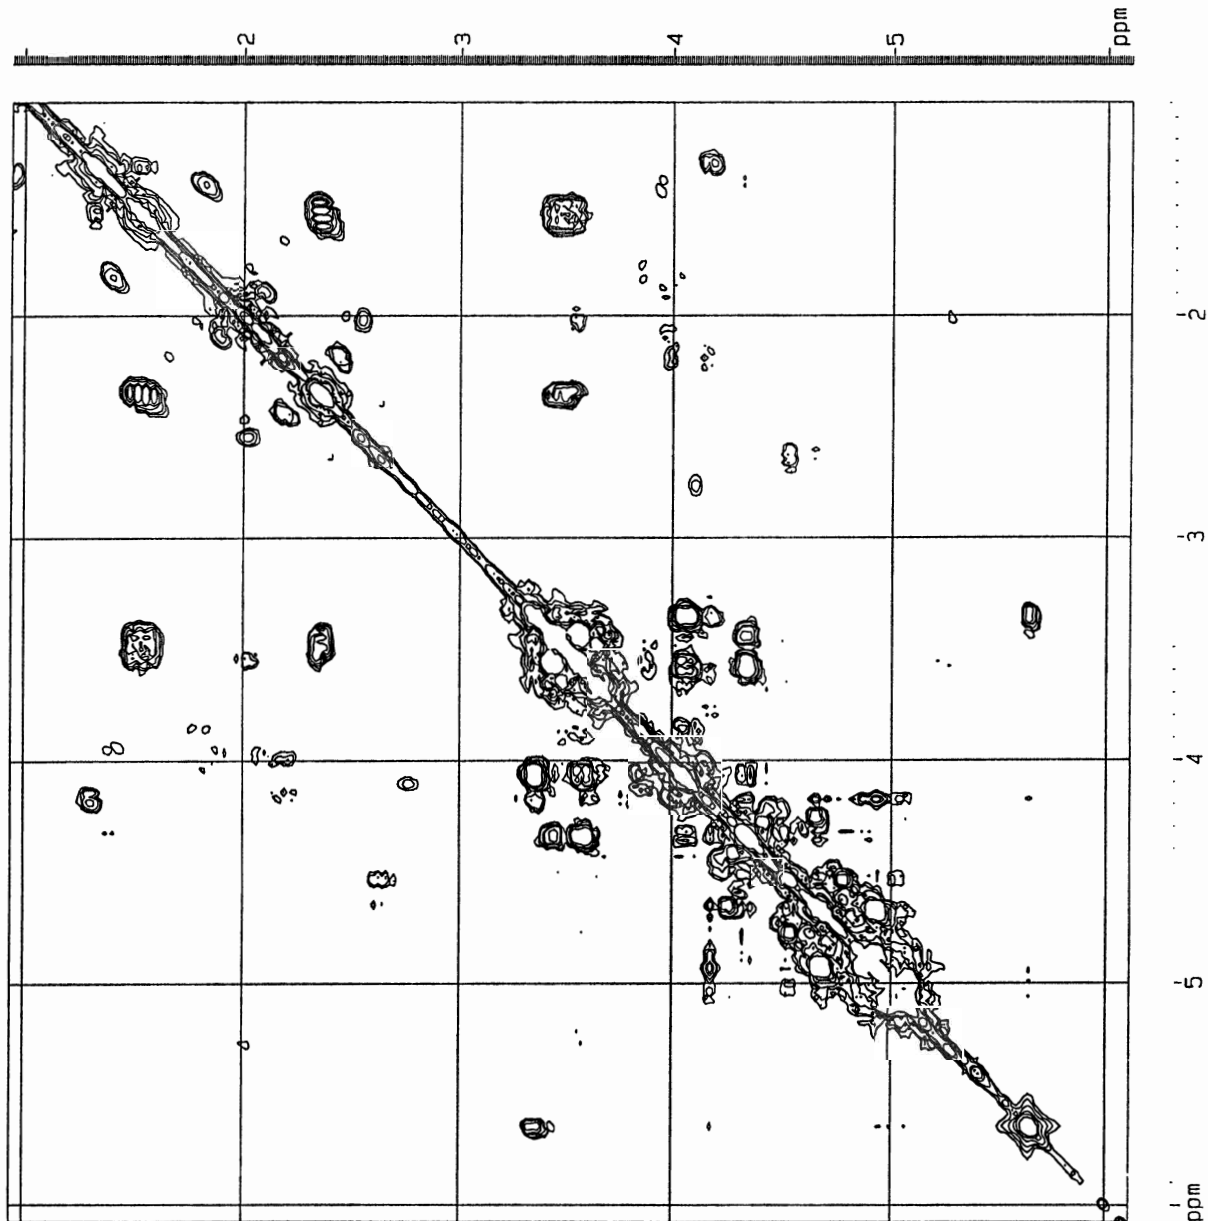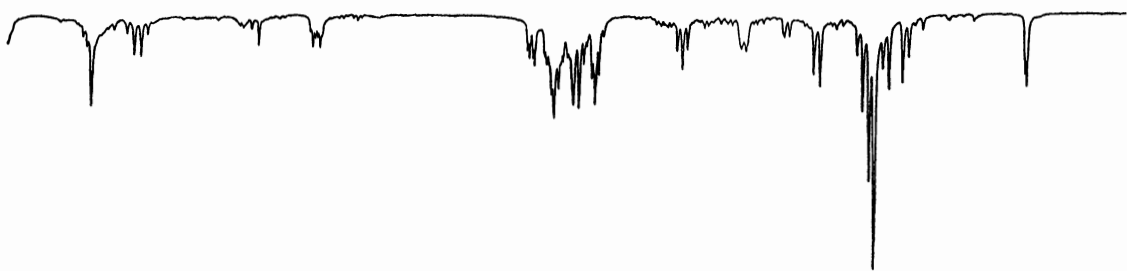

Standard  
Experiment

Current Data Parameters  
NAME 120405-1  
EXPNO 1  
PROCNO 1

F2 - Acquisition Parameters  
Date\_ 500000  
Time 10.32  
INSTRUM arx400  
PROBHD 5 mm Multinucl  
PULPROG zg  
TD 32768  
SOLVENT CDCl3  
NS 8  
DS 0  
SWH 7246.377 Hz  
FIDRES 0.221142 Hz  
AQ 2.2610421 sec  
RG 2860  
DM 69.000 usec  
DE 98.57 usec  
TE 298.0 K  
D1 1.00000000 sec  
P1 4.00 usec  
DE 98.57 usec  
SFO1 400.1328371 MHz  
NUCLEUS 1H

F2 - Processing parameters  
SI 16384  
SF 400.1300049 MHz  
WDW EM  
SSB 0  
LB 0.10 Hz  
GB 0  
PC 1.00

1D NMR plot parameters  
CX 20.00 cm  
F1P 8.433 ppm  
F1 3374.15 Hz  
F2P -0.377 ppm  
F2 -150.88 Hz  
PPMCH 0.44049 ppm/cm  
HZCM 176.25171 Hz/cm

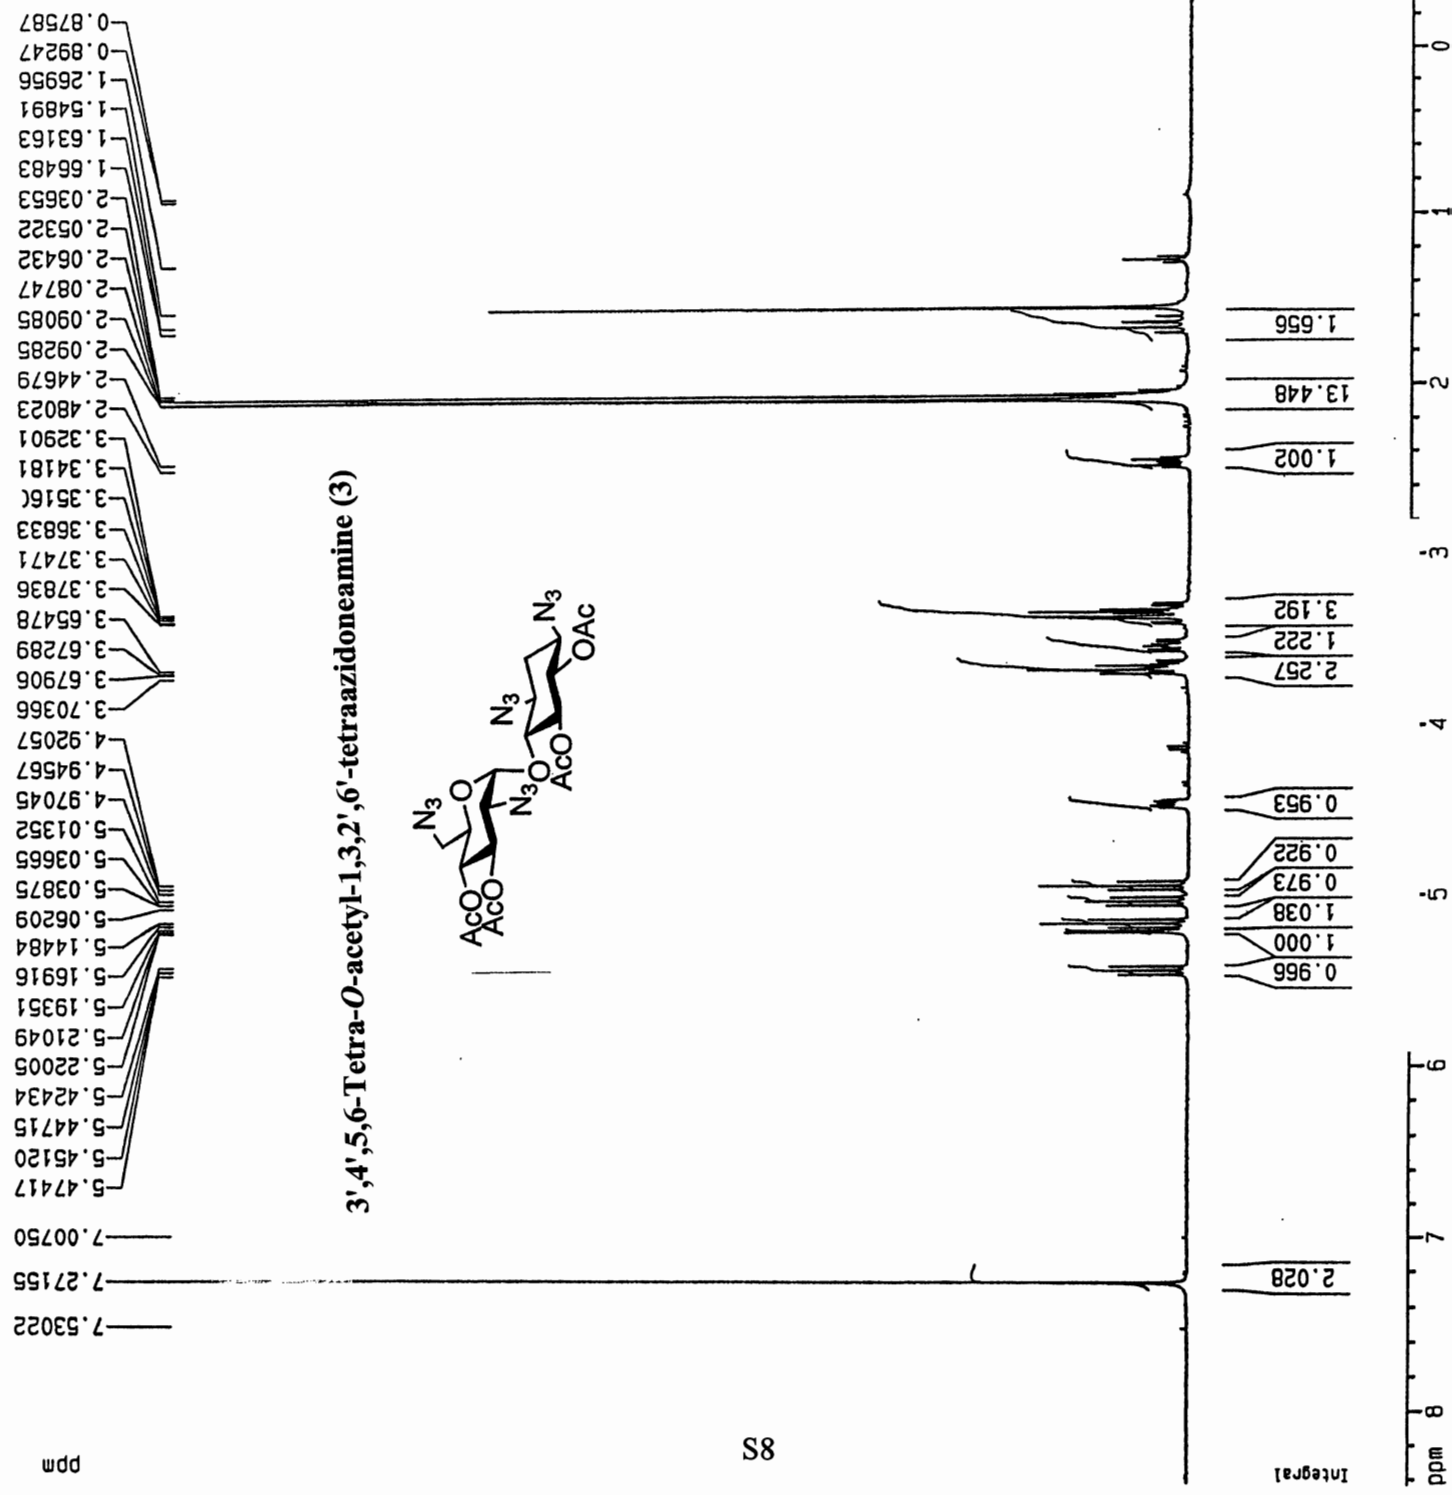



# Standard 13C Experiment

## 3',4',5,6-Tetra-O-acetyl-1,3,2',6'-tetraazidoneamine (3)

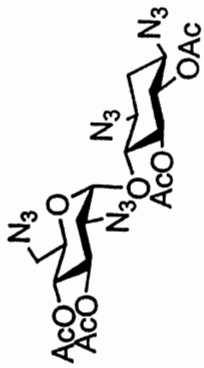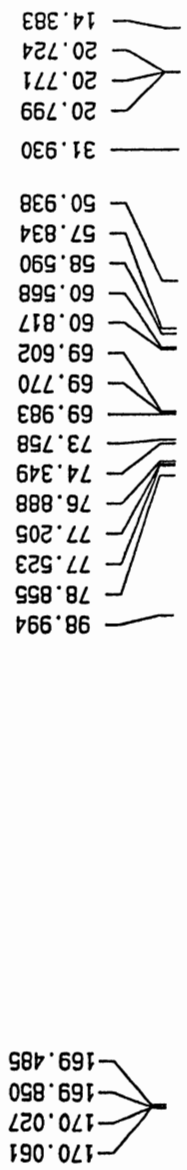

Current Data Parameters  
 NAME 060906-4  
 EXPNO 1  
 PROCNO 1

F2 - Acquisition Parameters  
 Date\_ 500000  
 Time 0.34  
 INSTRUM arx400  
 PROBHD 5 mm Multinucl  
 PULPROG zgpg30  
 TD 32768  
 SOLVENT CDCl3  
 NS 20000  
 DS 2  
 SWH 25000.000 Hz  
 FIDRES 0.762939 Hz  
 AQ 0.6554100 sec  
 RG 45500  
 DM 20.000 usec  
 DE 27.14 usec  
 TE 300.0 K  
 D12 0.00002000 sec  
 DL5 20.00 dB  
 CPDPRG waitz16  
 P31 100.00 usec  
 D1 0.40000001 sec  
 P1 6.75 usec  
 DE 27.14 usec  
 SF01 100.6231179 MHz  
 NUCLEUS 13C  
 D11 0.03000000 sec

F2 - Processing parameters  
 SI 16384  
 SF 100.6127490 MHz  
 NDM EM  
 SSB 0  
 LB 2.00 Hz  
 GB 0  
 PC 1.40

1D NMR plot parameters  
 CX 20.00 cm  
 F1P 205.346 ppm  
 F1 20660.42 Hz  
 F2P -9.474 ppm  
 F2 -953.25 Hz  
 PPMCH 10.74102 ppm/cm  
 HZCM 1080.68311 Hz/cm

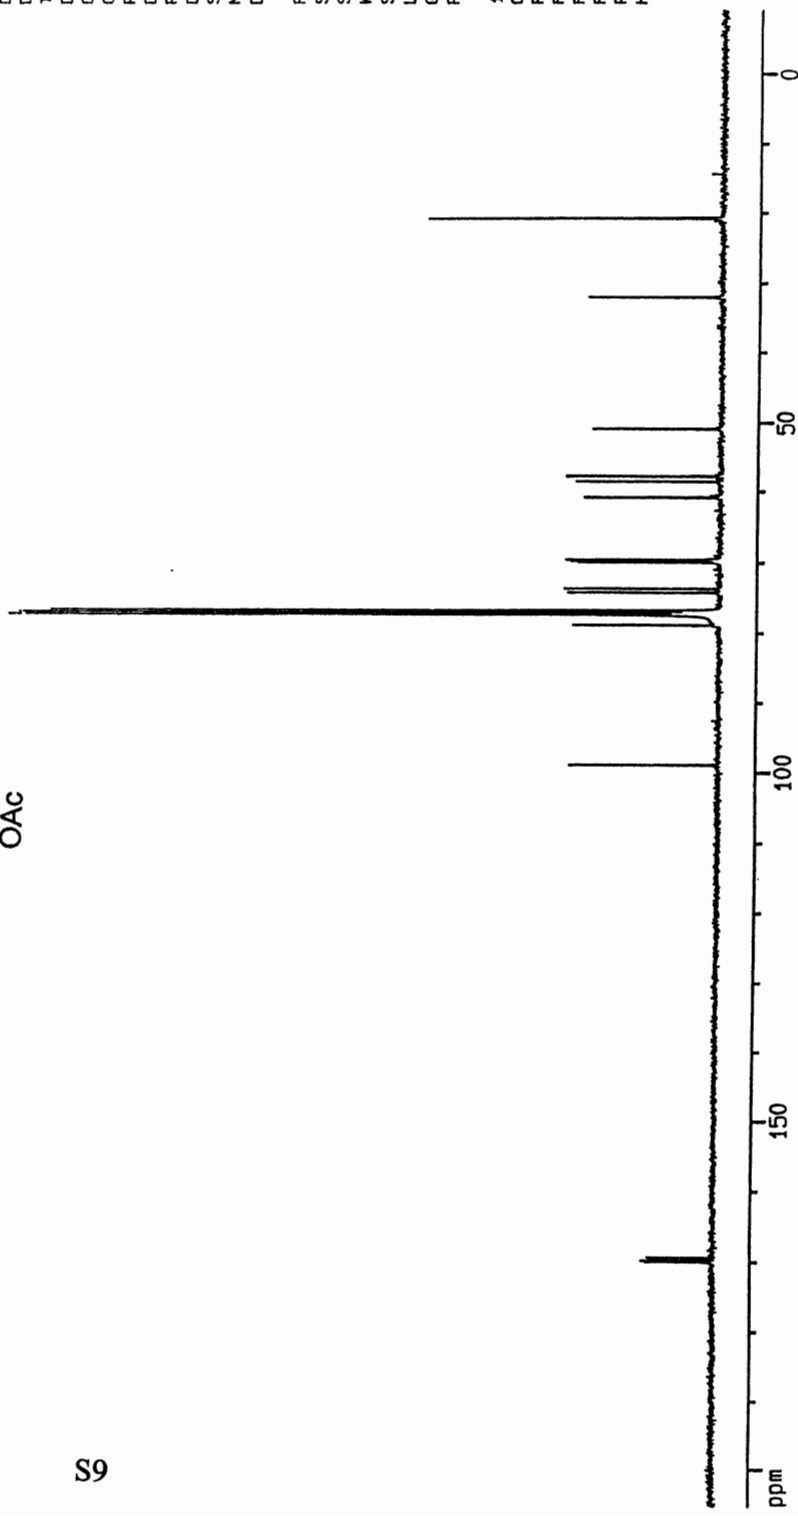

3',4',5,6-Tetra-O-acetyl-1,3,2',6'-tetraazidoneamine (3)

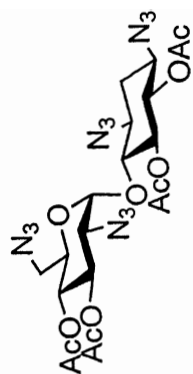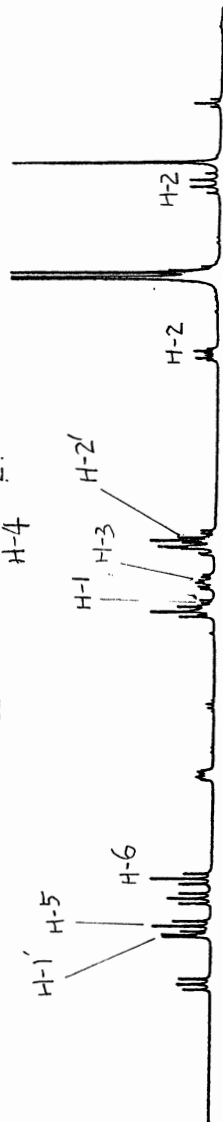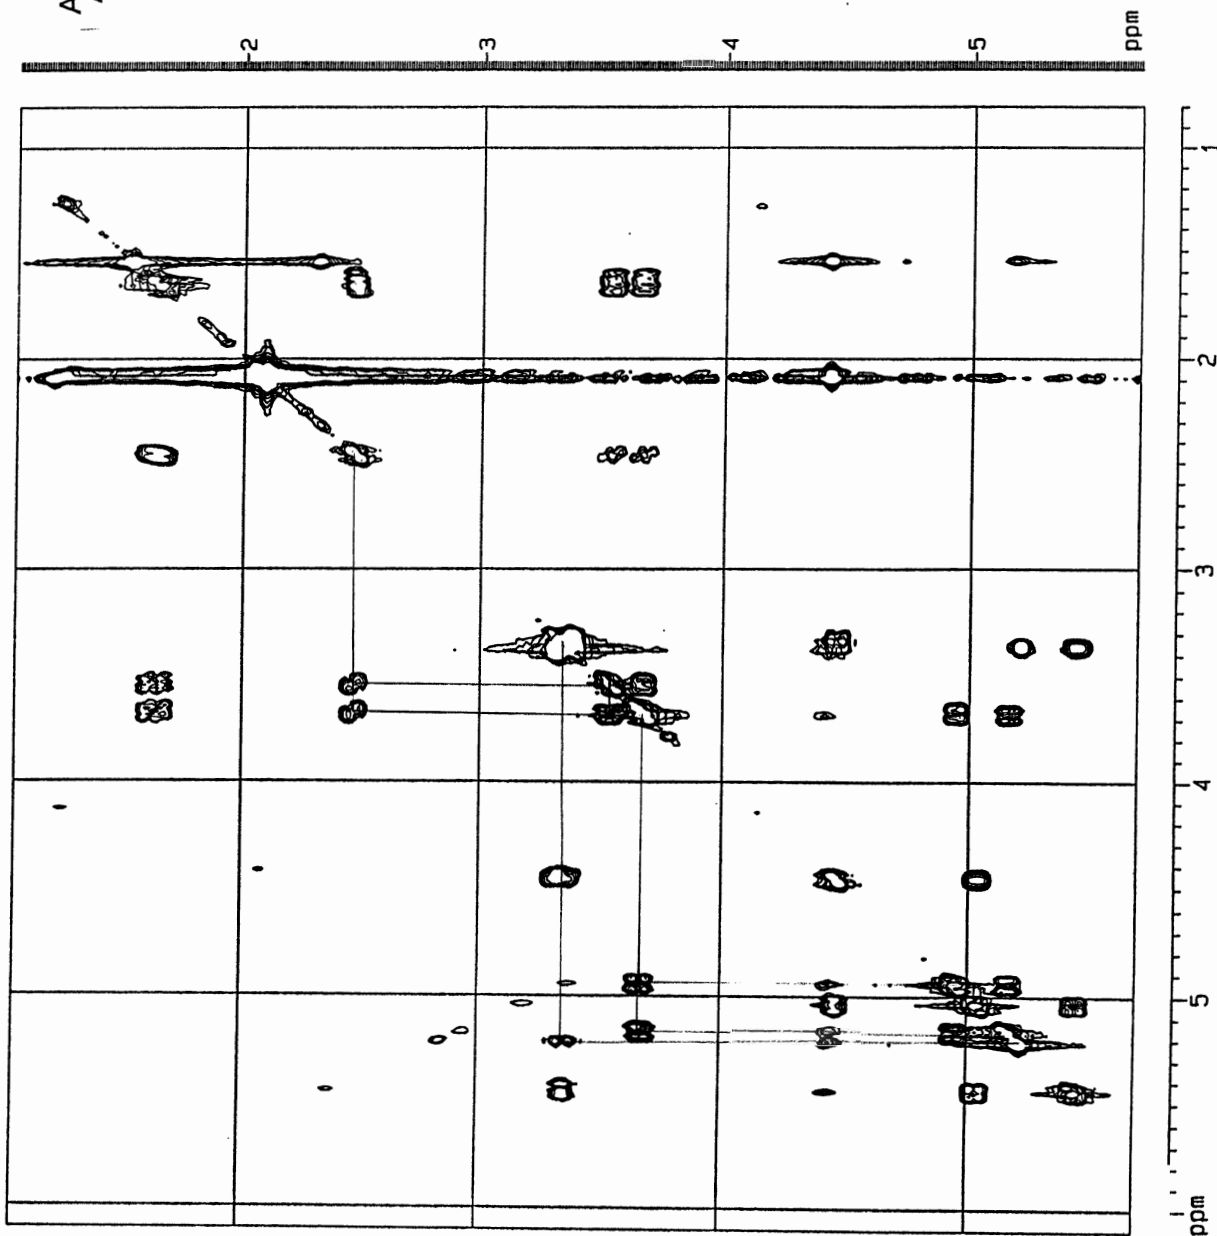

# Standard Product Experiment

Current Data Parameters  
 NAME 081306-3  
 EXPNO 1  
 PROCNO 1

## F2 - Acquisition Parameters

Date\_ 500000  
 Time 17.56  
 INSTRUM arx400  
 PROBHD 5 mm Multinucl  
 PULPROG zg  
 TO 32768  
 SOLVENT CDC13  
 NS B  
 DS 0  
 SWH 7246.377 Hz  
 FIDRES 0.221142 Hz  
 AQ 2.2610421 sec  
 RG 1430  
 DW 69.000 usec  
 DE 98.57 usec  
 TE 298.0 K  
 D1 1.0000000 sec  
 P1 4.00 usec  
 DE 98.57 usec  
 SF01 400.1328371 MHz  
 NUCLEUS 1H

## F2 - Processing parameters

SI 16384  
 SF 400.1300049 MHz  
 NDM EM  
 SSB 0  
 LB 0.10 Hz  
 GB 0  
 PC 1.00  
 1D NMR plot parameters  
 CX 20.00 cm  
 F1P 8.695 ppm  
 F1 3479.29 Hz  
 F2P -0.241 ppm  
 F2 -96.37 Hz  
 PPMCM 0.44681 ppm/cm  
 HZCM 178.78297 Hz/cm

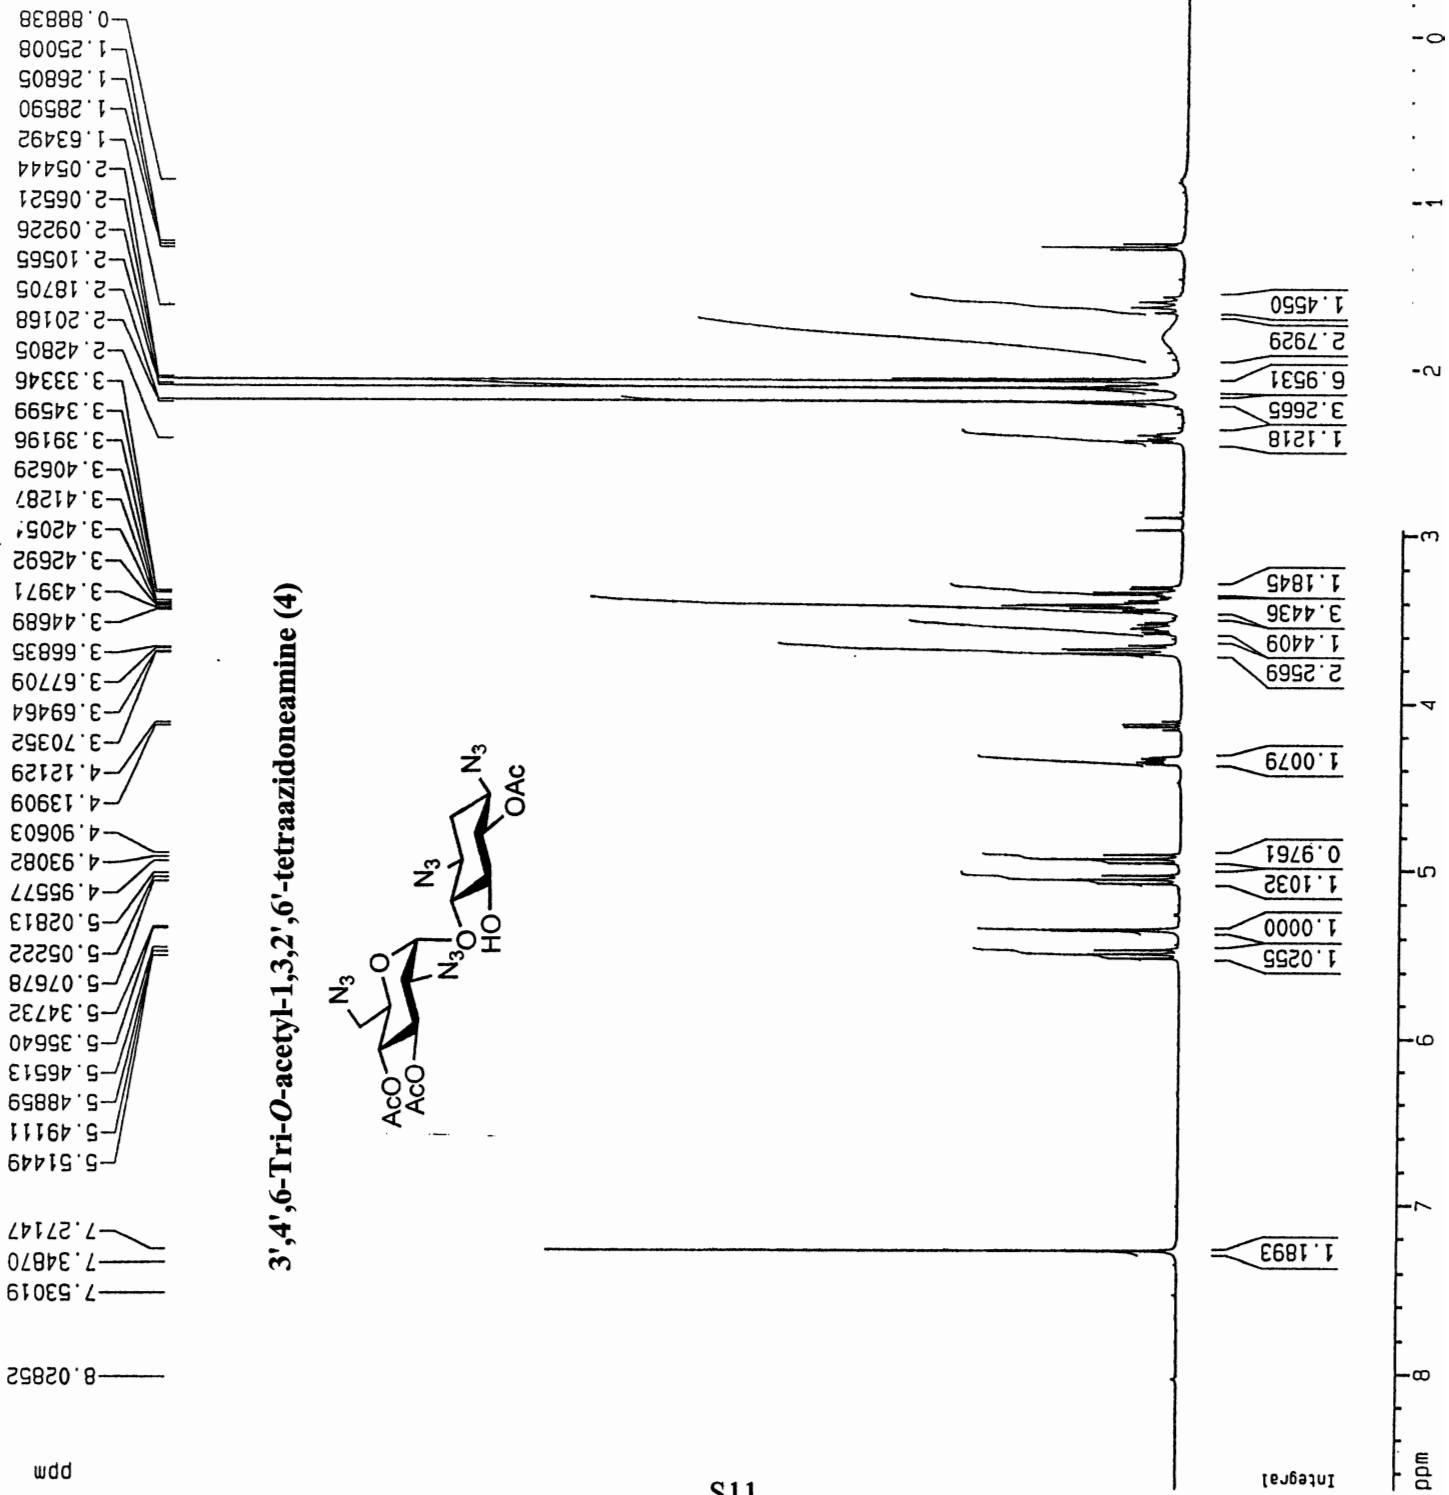

3',4',6-Tri-O-acetyl-1,3,2',6'-tetraazidoneamine (4)

3',4',6-Tri-O-acetyl-1,3,2',6'-tetraazidoneamine (4)

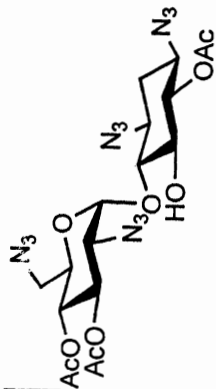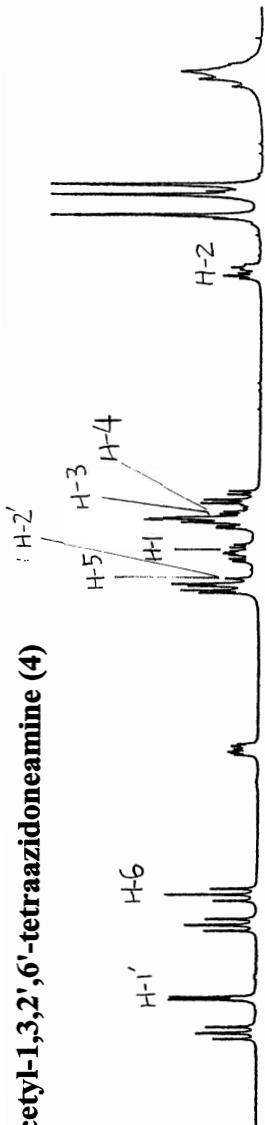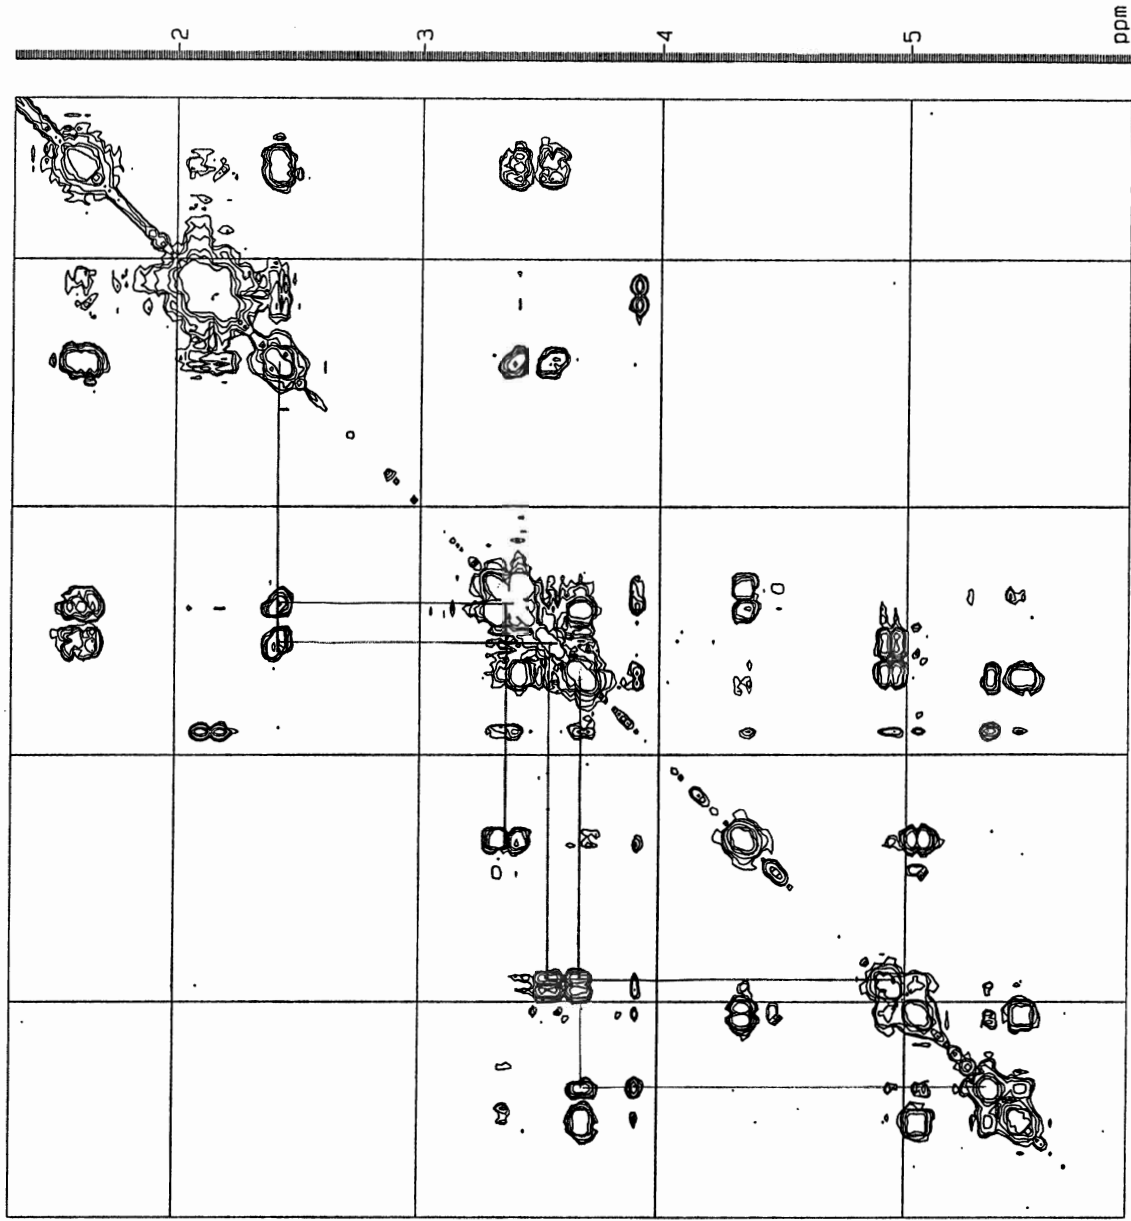

ppm 5 . . . . . 4 . . . . . 3 . . . . . 2 . . . . .

# Standard Proton Experiment

Current Data Parameters  
 NAME 061306-2  
 EXPNO 1  
 PROCNO 1

F2 - Acquisition Parameters  
 Date\_ 500000  
 Time 9.26  
 INSTRUM arx400  
 PROBHD 5 mm Multinuc1  
 PULPROG zg  
 TD 32768  
 SOLVENT CDCl3  
 NS 8  
 DS 0  
 SWH 7246.377 Hz  
 FIDRES 0.221142 Hz  
 AQ 2.2610421 sec  
 RG 512  
 DM 69.000 usec  
 DE 98.57 usec  
 TE 298.0 K  
 D1 1.00000000 sec  
 P1 4.00 usec  
 DE 98.57 usec  
 SF01 400.1328371 MHz  
 NUCLEUS 1H

F2 - Processing parameters  
 SI 16384  
 SF 400.1300049 MHz  
 WDW EM  
 SSB 0  
 LB 0.10 Hz  
 GB 0  
 PC 1.00

1D NMR plot parameters  
 CX 20.00 cm  
 F1P 8.411 ppm  
 F1 3365.61 Hz  
 F2P -0.441 ppm  
 F2 -176.49 Hz  
 PPMCM 0.44262 ppm/cm  
 HZCM 177.10519 Hz/cm

## 3',4',5,6-Tetra-O-acetyl-2'-N-tert-butoxycarbonyl-1,3,6'-triazidoneamine (8)

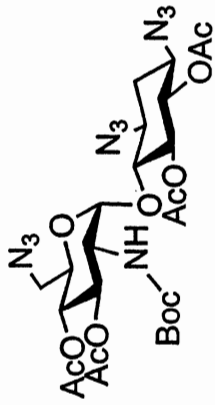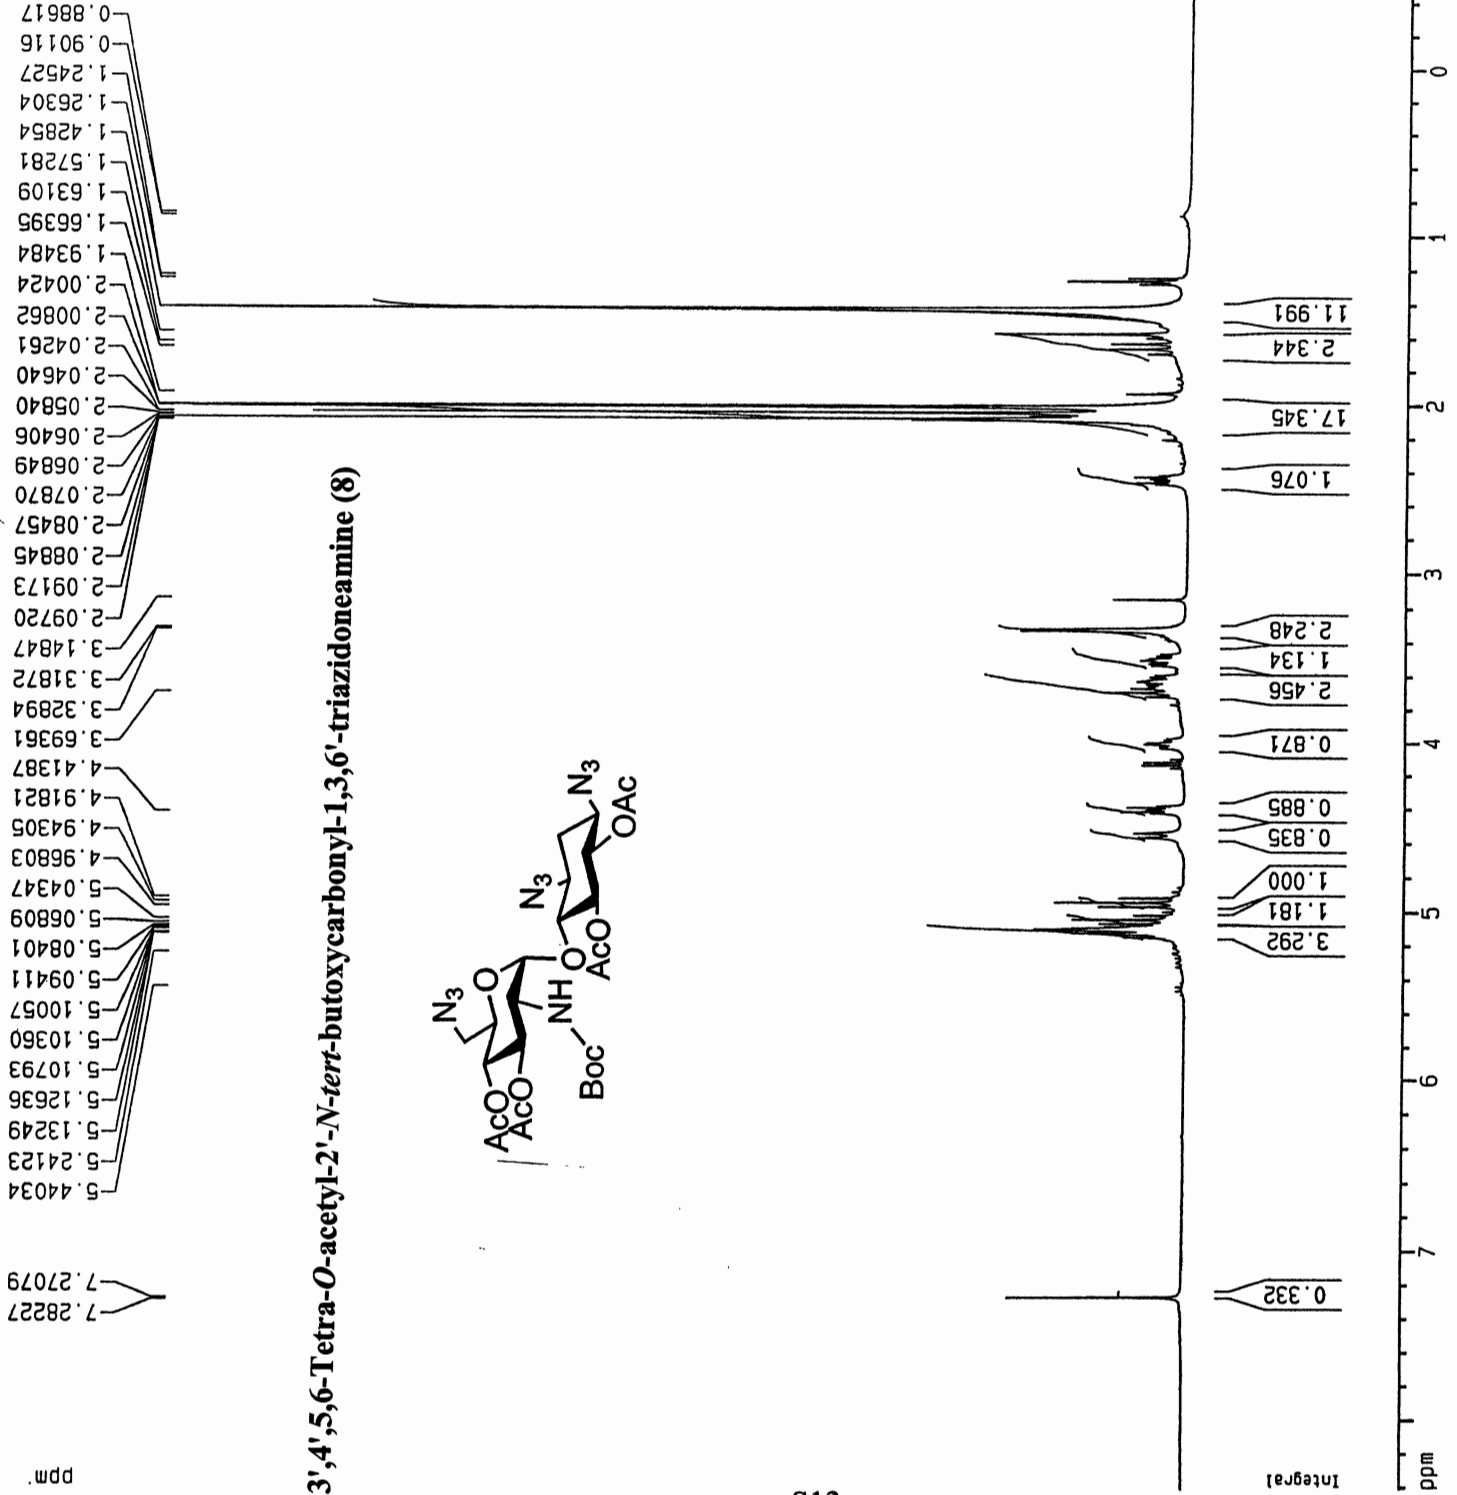

# Standard 13C Experiment

## 3',4',5,6-Tetra-O-acetyl-2'-N-tert-butoxybutyl-1,3,6'-triazidoneamine (8)

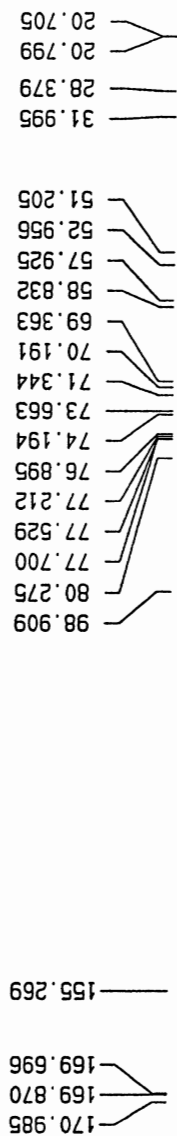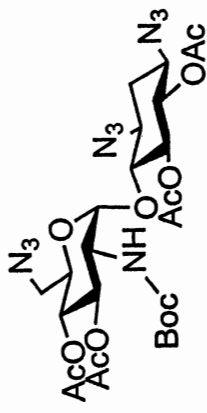

Current Data Parameters  
NAME 061306-5  
EXPNO 1  
PROCNO 1

F2 - Acquisition Parameters  
Date\_ 500000  
Time 23.08  
INSTRUM arx400  
PROBHD 5 mm Multinucl  
PULPROG zgpg30  
TD 32768  
SOLVENT COC13  
NS 3782  
DS 2  
SWH 25000.000 Hz  
FIDRES 0.762939 Hz  
AQ 0.6554100 sec  
RG 45500  
DW 20.000 usec  
DE 27.14 usec  
TE 300.0 K  
D12 0.00002000 sec  
DL5 20.00 dB  
CPOPRG waltz16  
P31 100.00 usec  
D1 0.40000001 sec  
P1 6.75 usec  
DE 27.14 usec  
SF01 100.6231179 MHz  
NUCLEUS 13C  
D11 0.03000000 sec

F2 - Processing parameters  
SI 16384  
SF 100.6127490 MHz  
MDM EM  
SSB 0  
LB 2.00 Hz  
GB 0  
PC 1.40

1D NMR plot parameters  
CX 20.00 cm  
F1P 204.468 ppm  
F1 20572.08 Hz  
F2P -6.840 ppm  
F2 -688.23 Hz  
PPMCM 10.56541 ppm/cm  
HZCM 1063.01526 Hz/cm

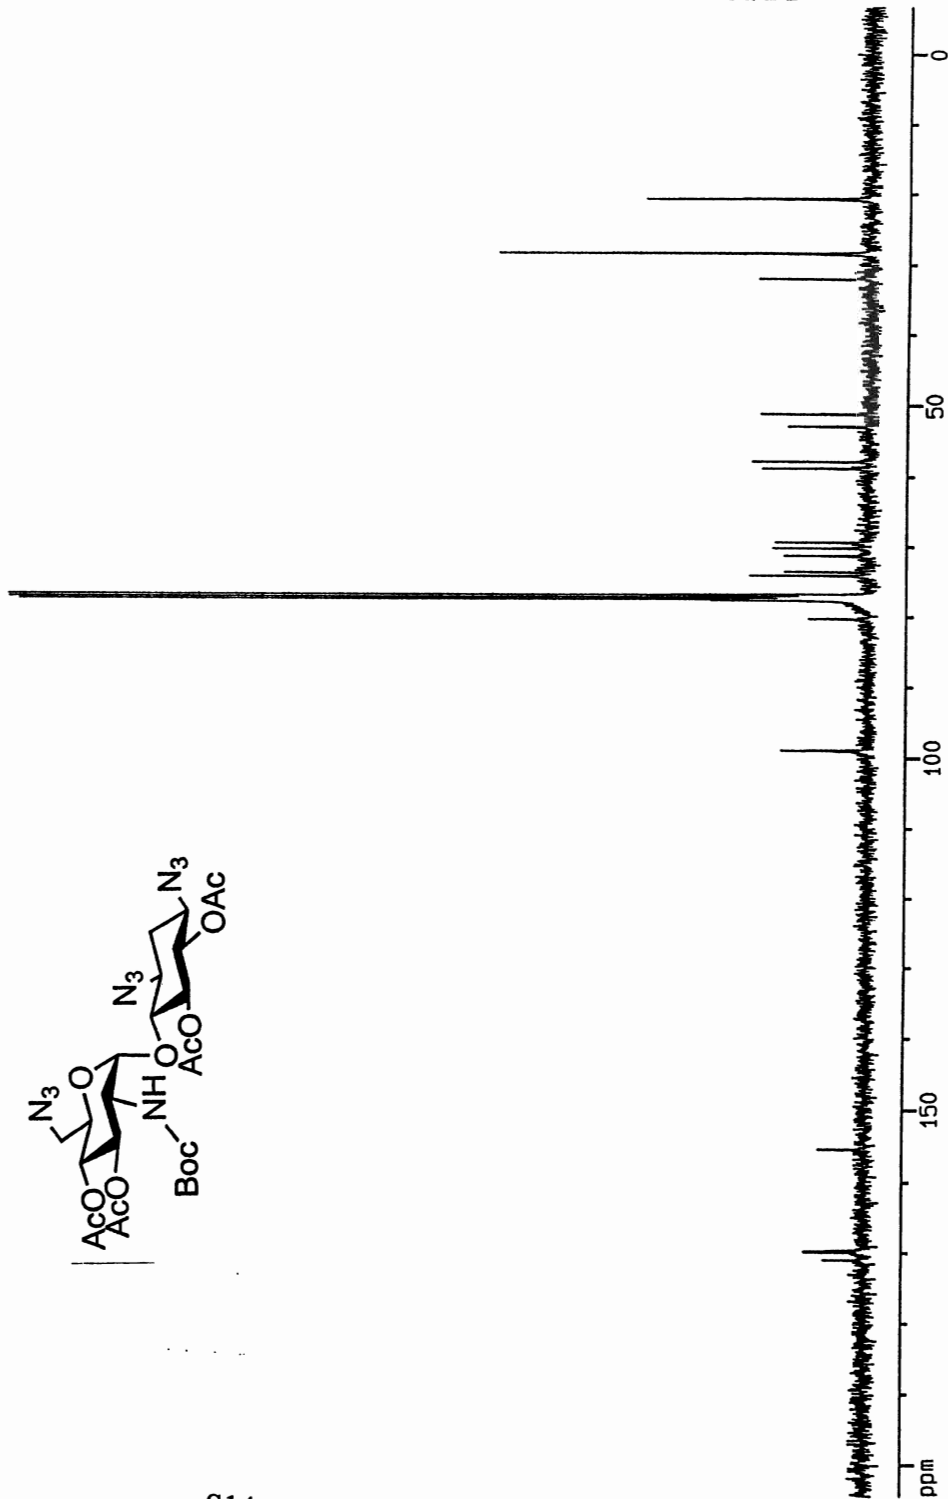

3',4',5,6-Tetra-O-acetyl-2'-N-tert-butoxycarbonyl-1,3,6'-triazidoneamine (8)

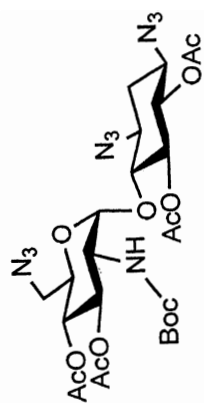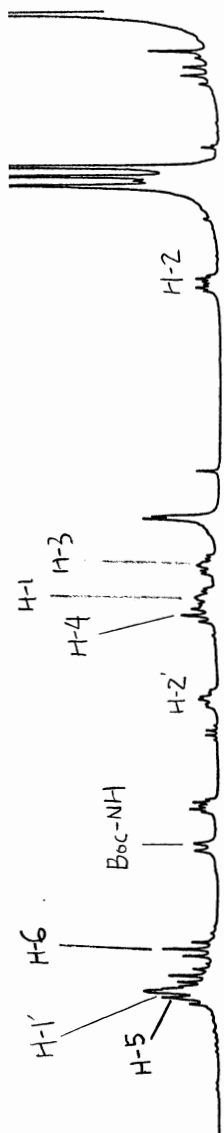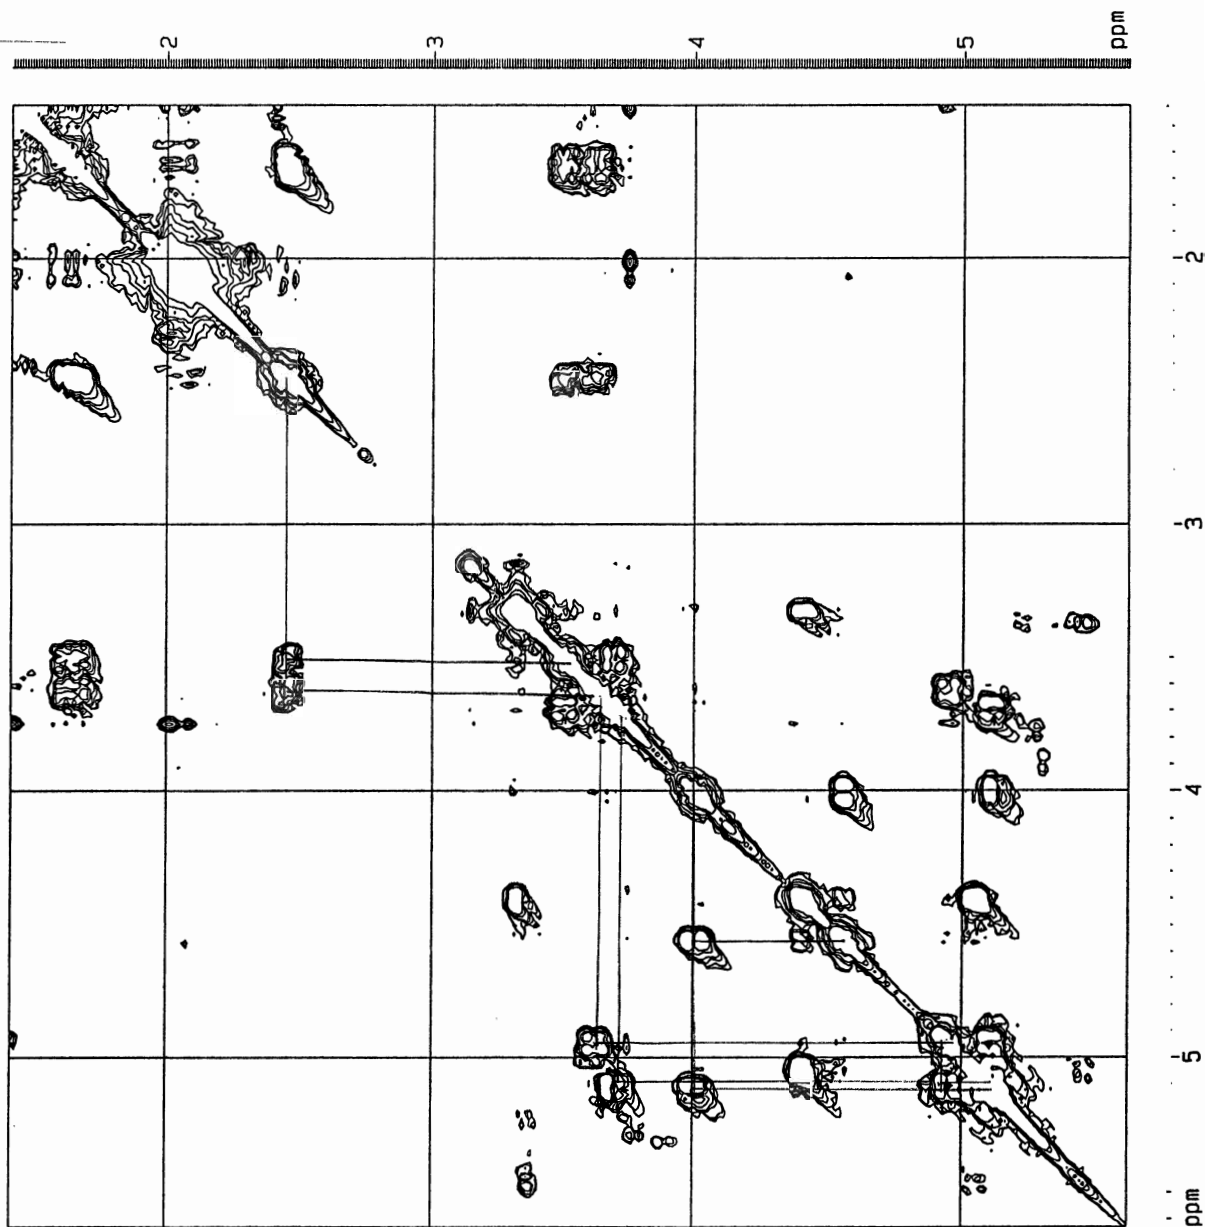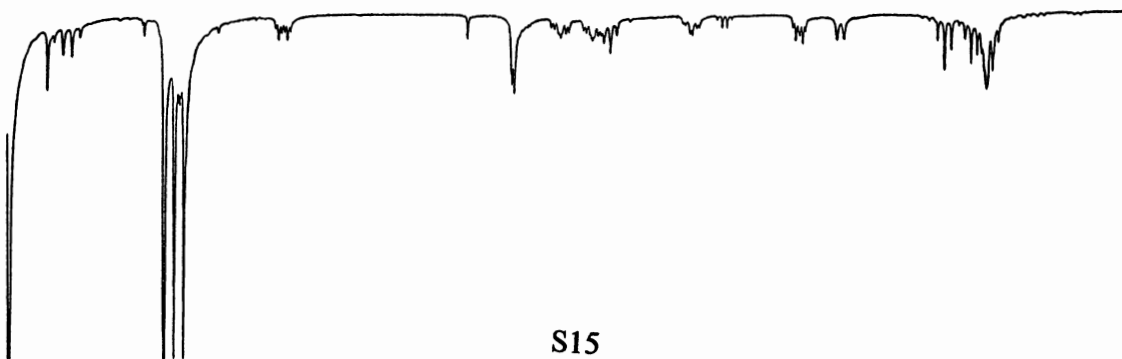

**3',4'-Di-O-acetyl-5,6-O-Cyclohexylidene-1-N-tert-butoxycarbonyl-3,2',6'-triazidoneamine (11)**

**Standard Proton Experiment**

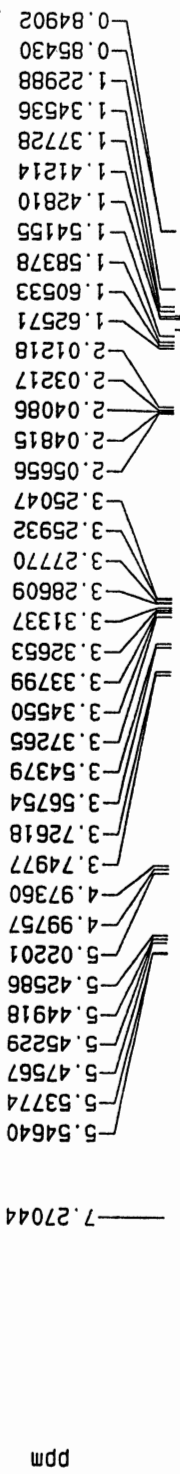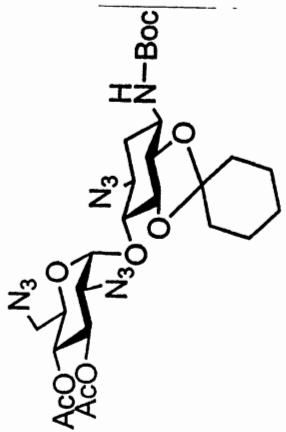

Current Data Parameters  
 NAME 010506-1  
 EXPNO 1  
 PROCNO 1

F2 - Acquisition Parameters  
 Date\_ 500000  
 Time 10.45  
 INSTRUM arx400  
 PROBHD 5 mm Multinucl  
 PULPROG zg  
 TO 32768  
 SOLVENT CDCl3  
 NS 8  
 DS 0  
 SWH 7246.377 Hz  
 FIDRES 0.221142 Hz  
 AQ 2.2610421 sec  
 RG 64  
 DM 69.000 usec  
 DE 98.57 usec  
 TE 298.0 K  
 D1 1.00000000 sec  
 P1 4.00 usec  
 DE 98.57 usec  
 SFO1 400.1328371 MHz  
 NUCLEUS 1H

F2 - Processing parameters  
 SI 16384  
 SF 400.1300049 MHz  
 HDW EM  
 SSB 0  
 LB 0.10 Hz  
 GB 0  
 PC 1.00

1D NMR plot parameters  
 CX 20.00 cm  
 F1P 8.323 ppm  
 F1 3570.46 Hz  
 F2P -0.804 ppm  
 F2 -321.59 Hz  
 PPMCM 0.48635 ppm/cm  
 HZCM 194.50234 Hz/cm

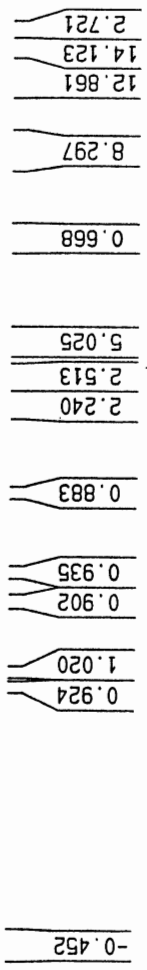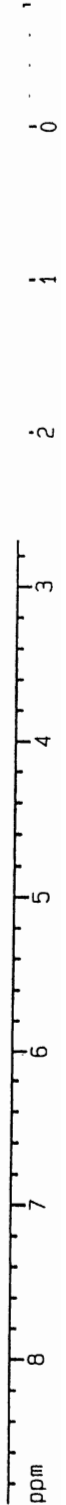



Standard 13C  
Experiment

3',4'-Di-O-acetyl-5,6-O-Cyclohexylidene-1-N-tert-butoxycarbonyl-3,2',6'-triazidoneamine (11)

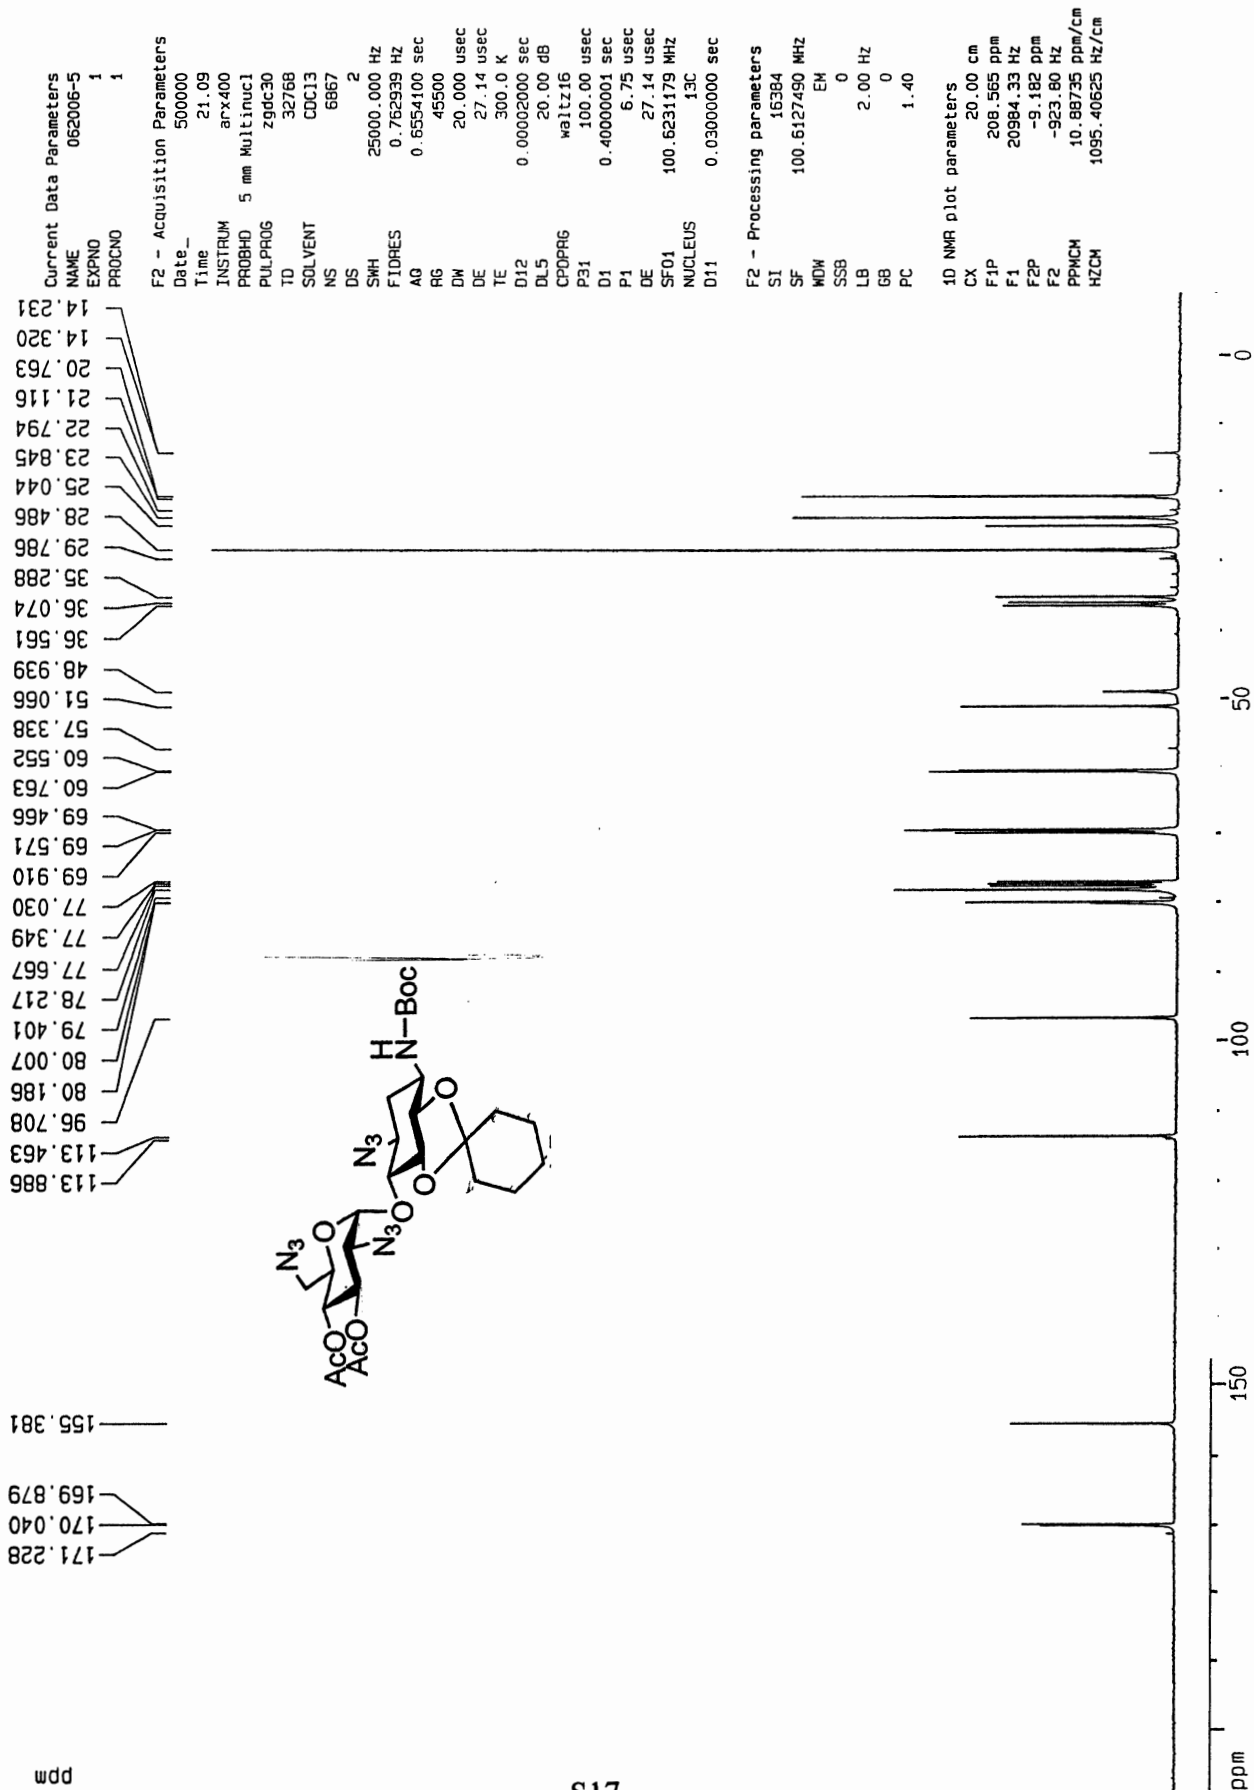

3',4'-Di-O-acetyl-5,6-O-Cyclohexylidene-1-N-tert-butylbutoxycarbonyl-3,2',6'-triazidoneamine (11)

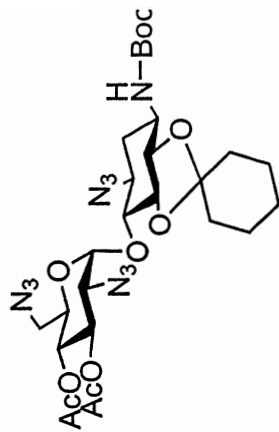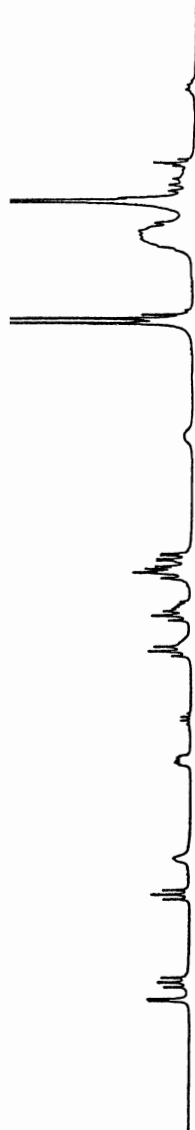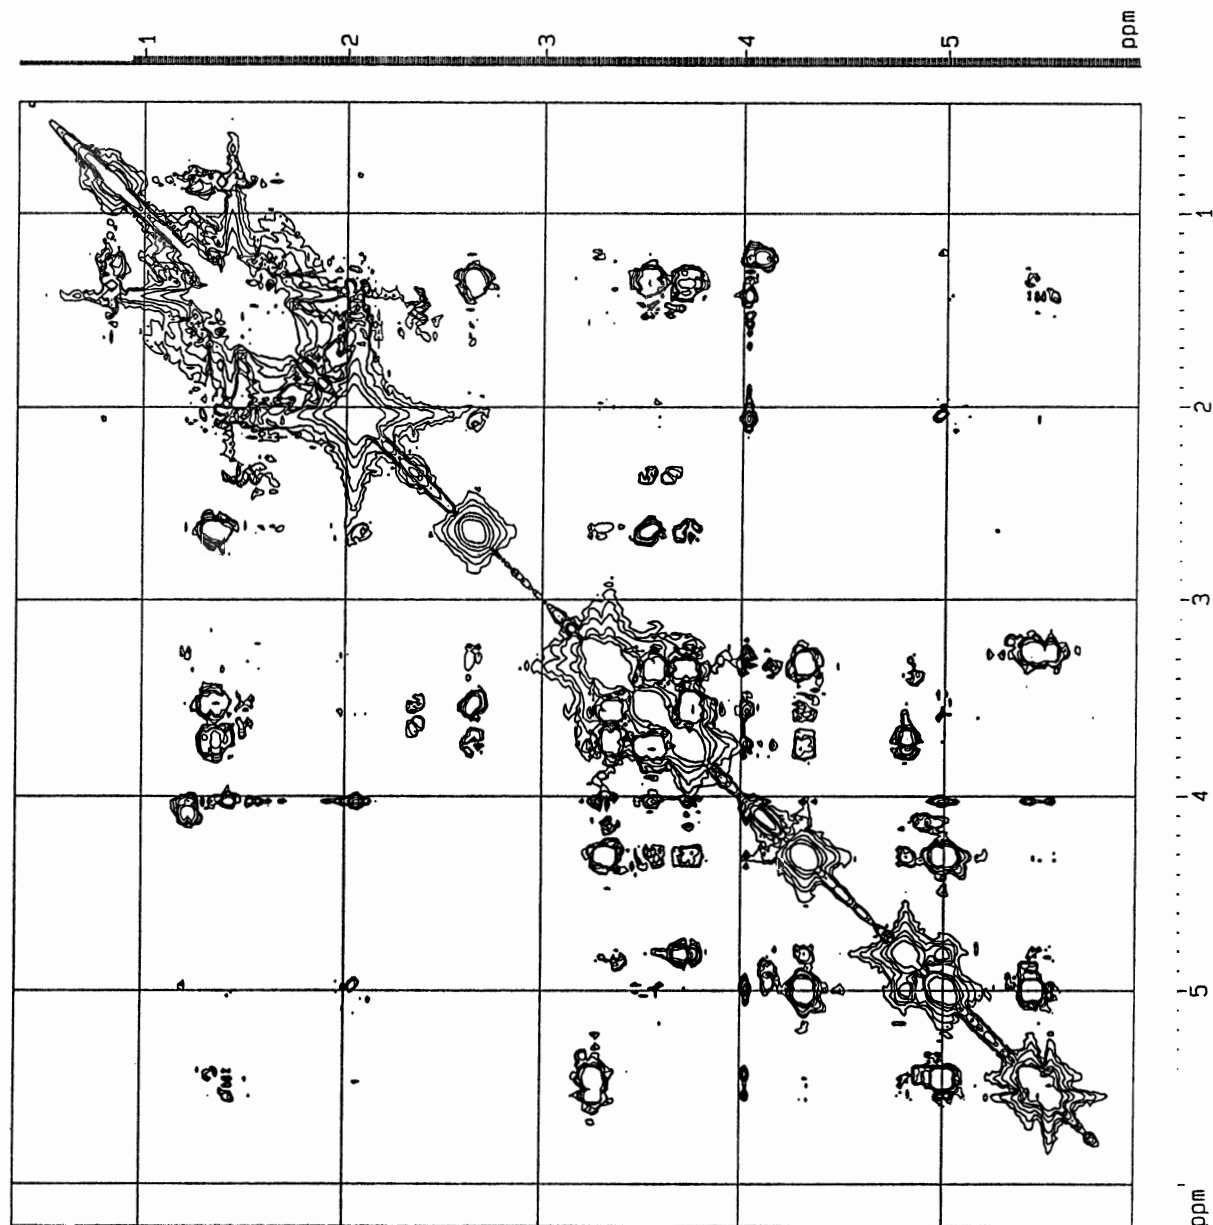

3',4'-Di-O-acetyl-5,6-O-Cyclohexylidene-3-N-tert-butoxycarbonyl-1,2,6'-triazidoneamine (12)

Standard Proton Experiment

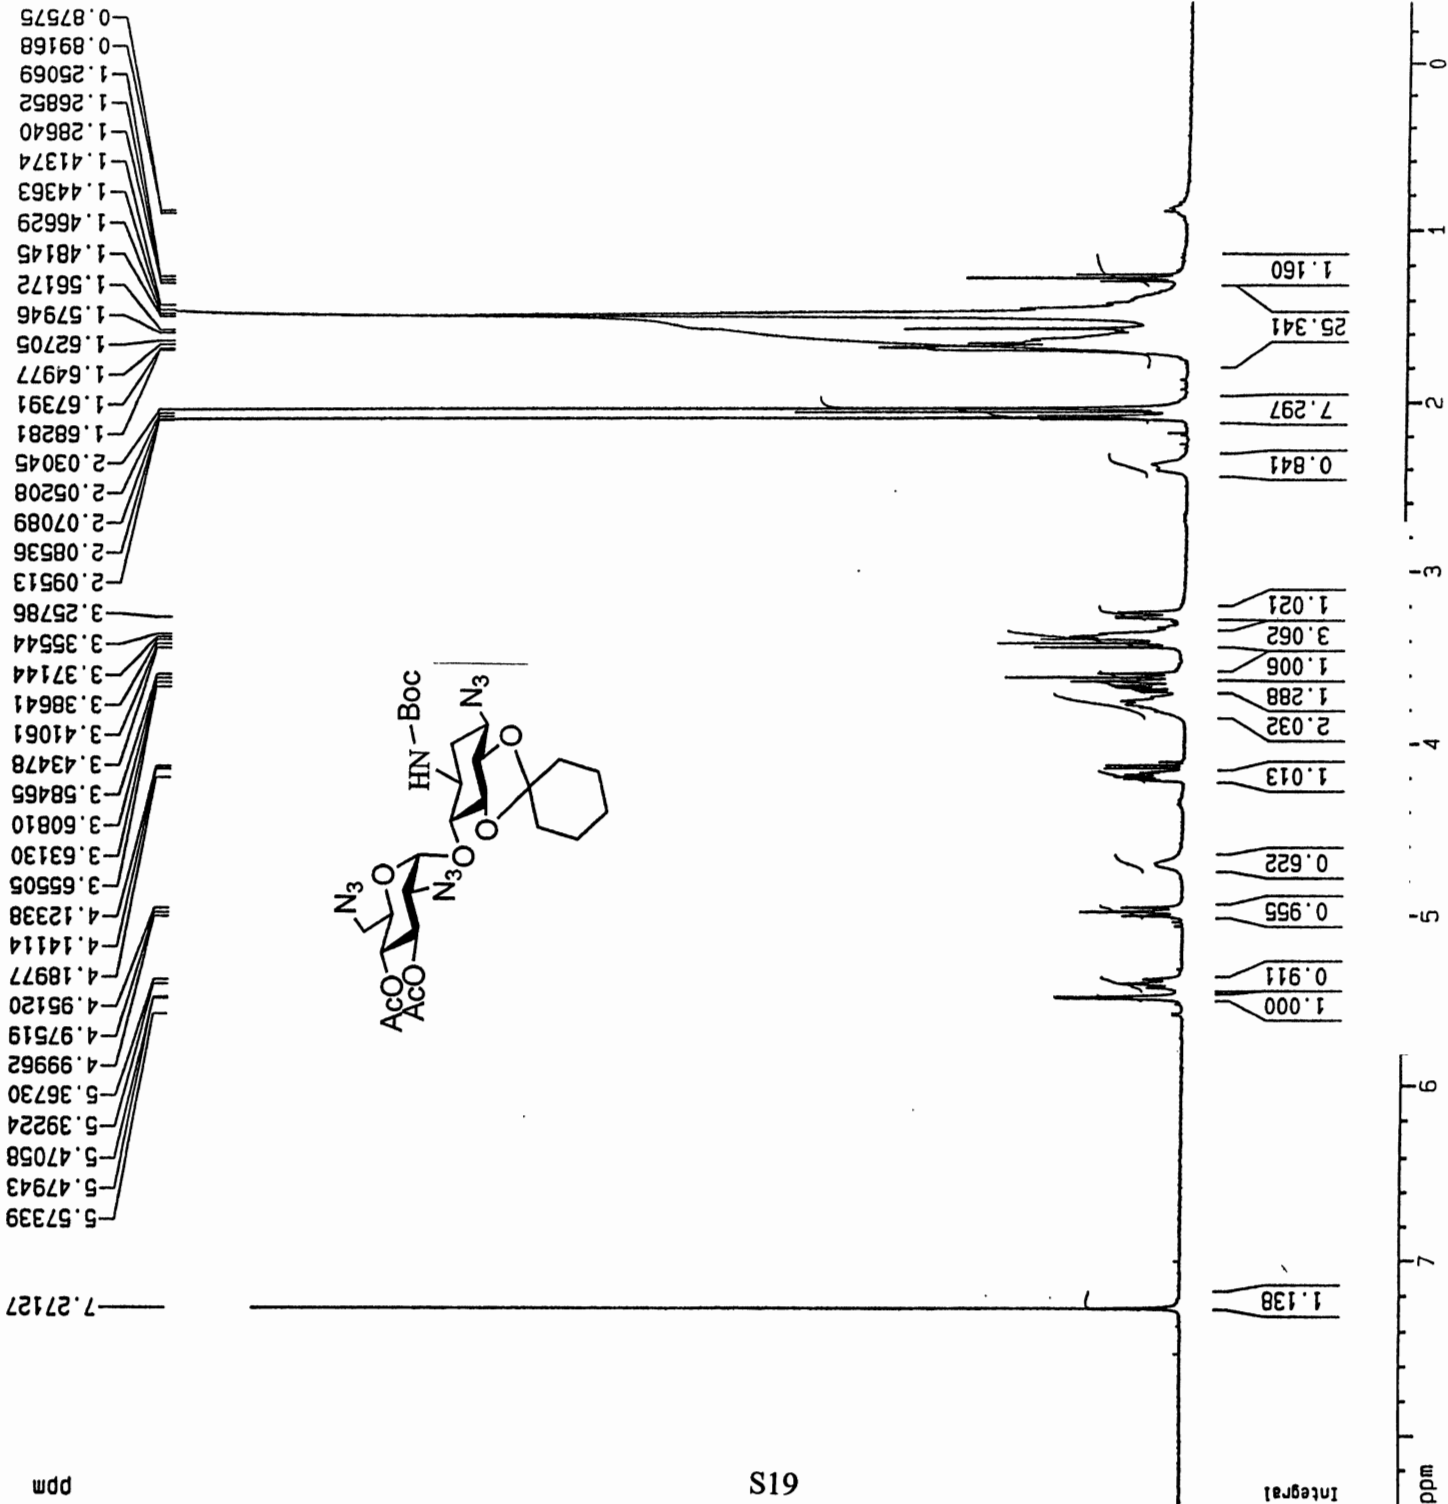

Current Data Parameters  
 NAME 012506-3  
 EXPNO 1  
 PROCNO 1

F2 - Acquisition Parameters  
 Date\_ 500000  
 Time 12.33  
 INSTRUM arc400  
 PROBHD 5 mm Multinucl  
 PULPROG zg  
 TD 32768  
 SOLVENT CDCl3  
 NS 8  
 DS 0  
 SMH 7246.377 Hz  
 FIDRES 0.221142 Hz  
 AQ 2.2610421 sec  
 RG 1430  
 DH 69.000 usec  
 DE 98.57 usec  
 TE 298.0 K  
 D1 1.00000000 sec  
 P1 4.00 usec  
 DE 98.57 usec  
 SFO1 400.1328371 MHz  
 NUCLEUS 1H

F2 - Processing parameters  
 SI 16384  
 SF 400.1300049 MHz  
 MDW EM  
 SSB 0  
 LB 0.10 Hz  
 GB 0  
 PC 1.00

1D NMR plot parameters  
 CX 20.00 cm  
 F1P 8.390 ppm  
 F1 3357.08 Hz  
 F2P -0.377 ppm  
 F2 -150.88 Hz  
 PPMCH 0.43835 ppm/cm  
 HZCM 175.39818 Hz/cm

7.27127  
 5.57339  
 5.47943  
 5.47058  
 5.39224  
 5.36730  
 4.99962  
 4.97519  
 4.95120  
 4.18977  
 4.14114  
 4.12338  
 3.65505  
 3.63130  
 3.60810  
 3.58465  
 3.43478  
 3.41061  
 3.38641  
 3.37144  
 3.35544  
 3.25786  
 2.09513  
 2.08536  
 2.07089  
 2.05208  
 2.03045  
 1.68281  
 1.67391  
 1.64977  
 1.62705  
 1.57946  
 1.56172  
 1.48145  
 1.46629  
 1.44363  
 1.41374  
 1.28640  
 1.26852  
 1.25069  
 0.89168  
 0.87575

1.138  
 1.000  
 0.911  
 0.955  
 0.622  
 1.013  
 2.032  
 1.288  
 1.006  
 3.062  
 1.021  
 0.841  
 7.297  
 25.341  
 1.160

Standard 13C  
Experiment

3',4'-Di-O-acetyl-5,6-O-Cyclohexylidene-3-N-tert-butoxycarbonyl-1,2',6'-triazidoneamine (12)

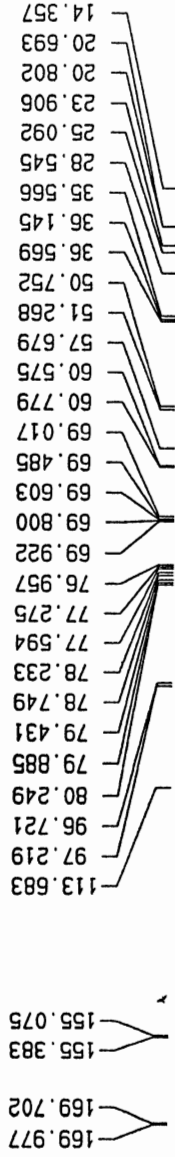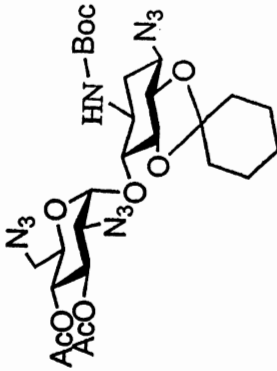

Current Data Parameters  
 NAME 062006-7  
 EXPNO 1  
 PROCNO 1

F2 - Acquisition Parameters  
 Date\_ 500000  
 Time 0.44  
 INSTRUM arx400  
 PROBHD 5 mm Multinucl  
 PULPROG zgpg30  
 TD 32768  
 SOLVENT CDC13  
 NS 20000  
 DS 2  
 SWH 25000.000 Hz  
 FIDRES 0.762939 Hz  
 AQ 0.6554100 sec  
 RG 45500  
 DW 20.000 usec  
 DE 27.14 usec  
 TE 300.0 K  
 D12 0.00002000 sec  
 DL5 20.00 dB  
 CPOPRG waltz16  
 P31 100.00 usec  
 D1 0.40000001 sec  
 P1 6.75 usec  
 DE 27.14 usec  
 SF01 100.6231179 MHz  
 NUCLEUS 13C  
 D11 0.03000000 sec

F2 - Processing parameters  
 SI 16384  
 SF 100.6127490 MHz  
 NDM EM  
 SSB 0  
 LB 2.00 Hz  
 GB 0  
 PC 1.40

1D NMR plot parameters  
 CX 20.00 cm  
 F1P 227.296 ppm  
 F1 22868.89 Hz  
 F2P -21.181 ppm  
 F2 -2131.10 Hz  
 PPMCM 12.42387 ppm/cm  
 HZCM 1249.99988 Hz/cm

3',4'-Di-O-acetyl-5,6-O-Cyclohexylidene-3-N-tert-butoxycarbonyl-1,2',6'-triazidoneamine (12)

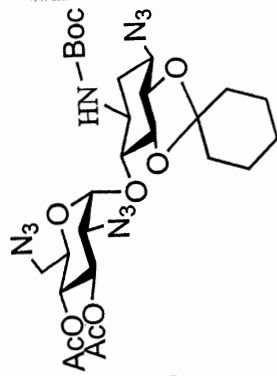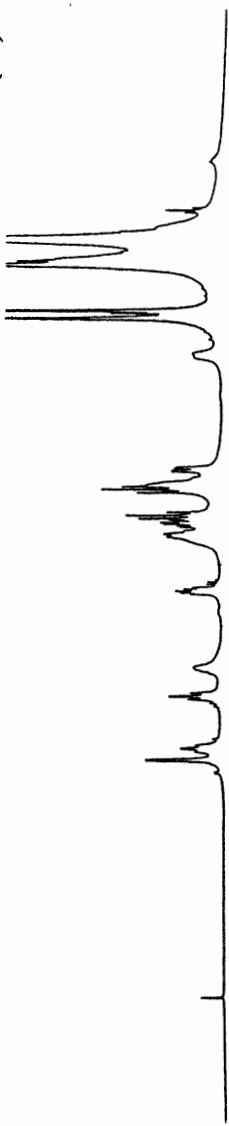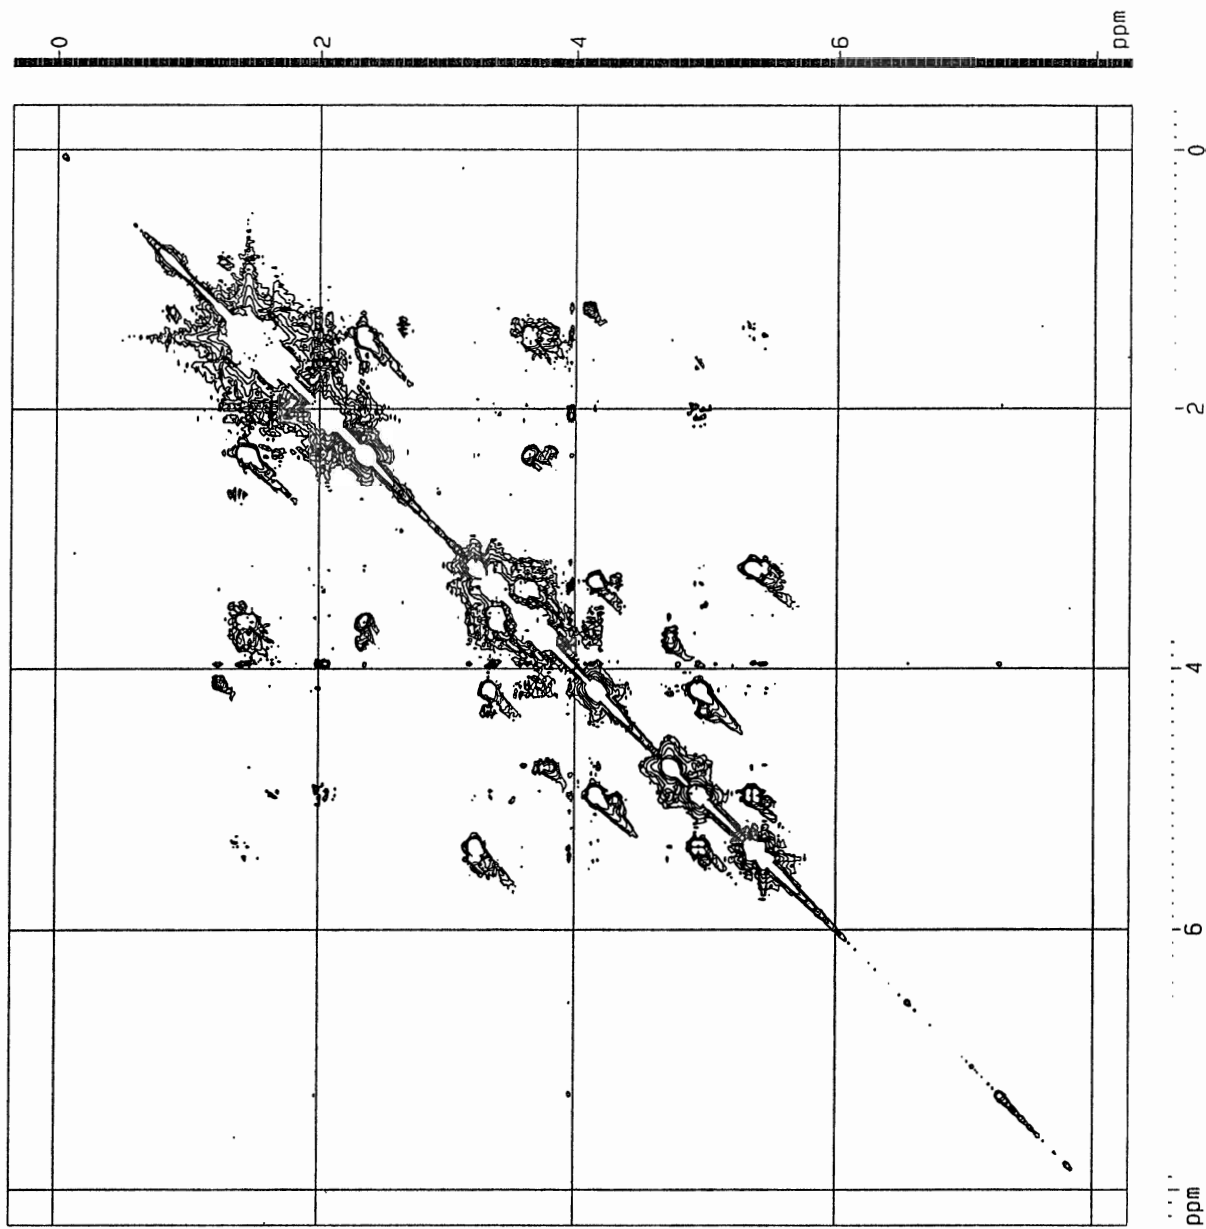

3',4'-Di-O-acetyl-1-N-[(S)-4-(benzyloxycarbonylamino)-2-benzyloxybutanoyl]-3,2,6'-triazidoneamine (14)

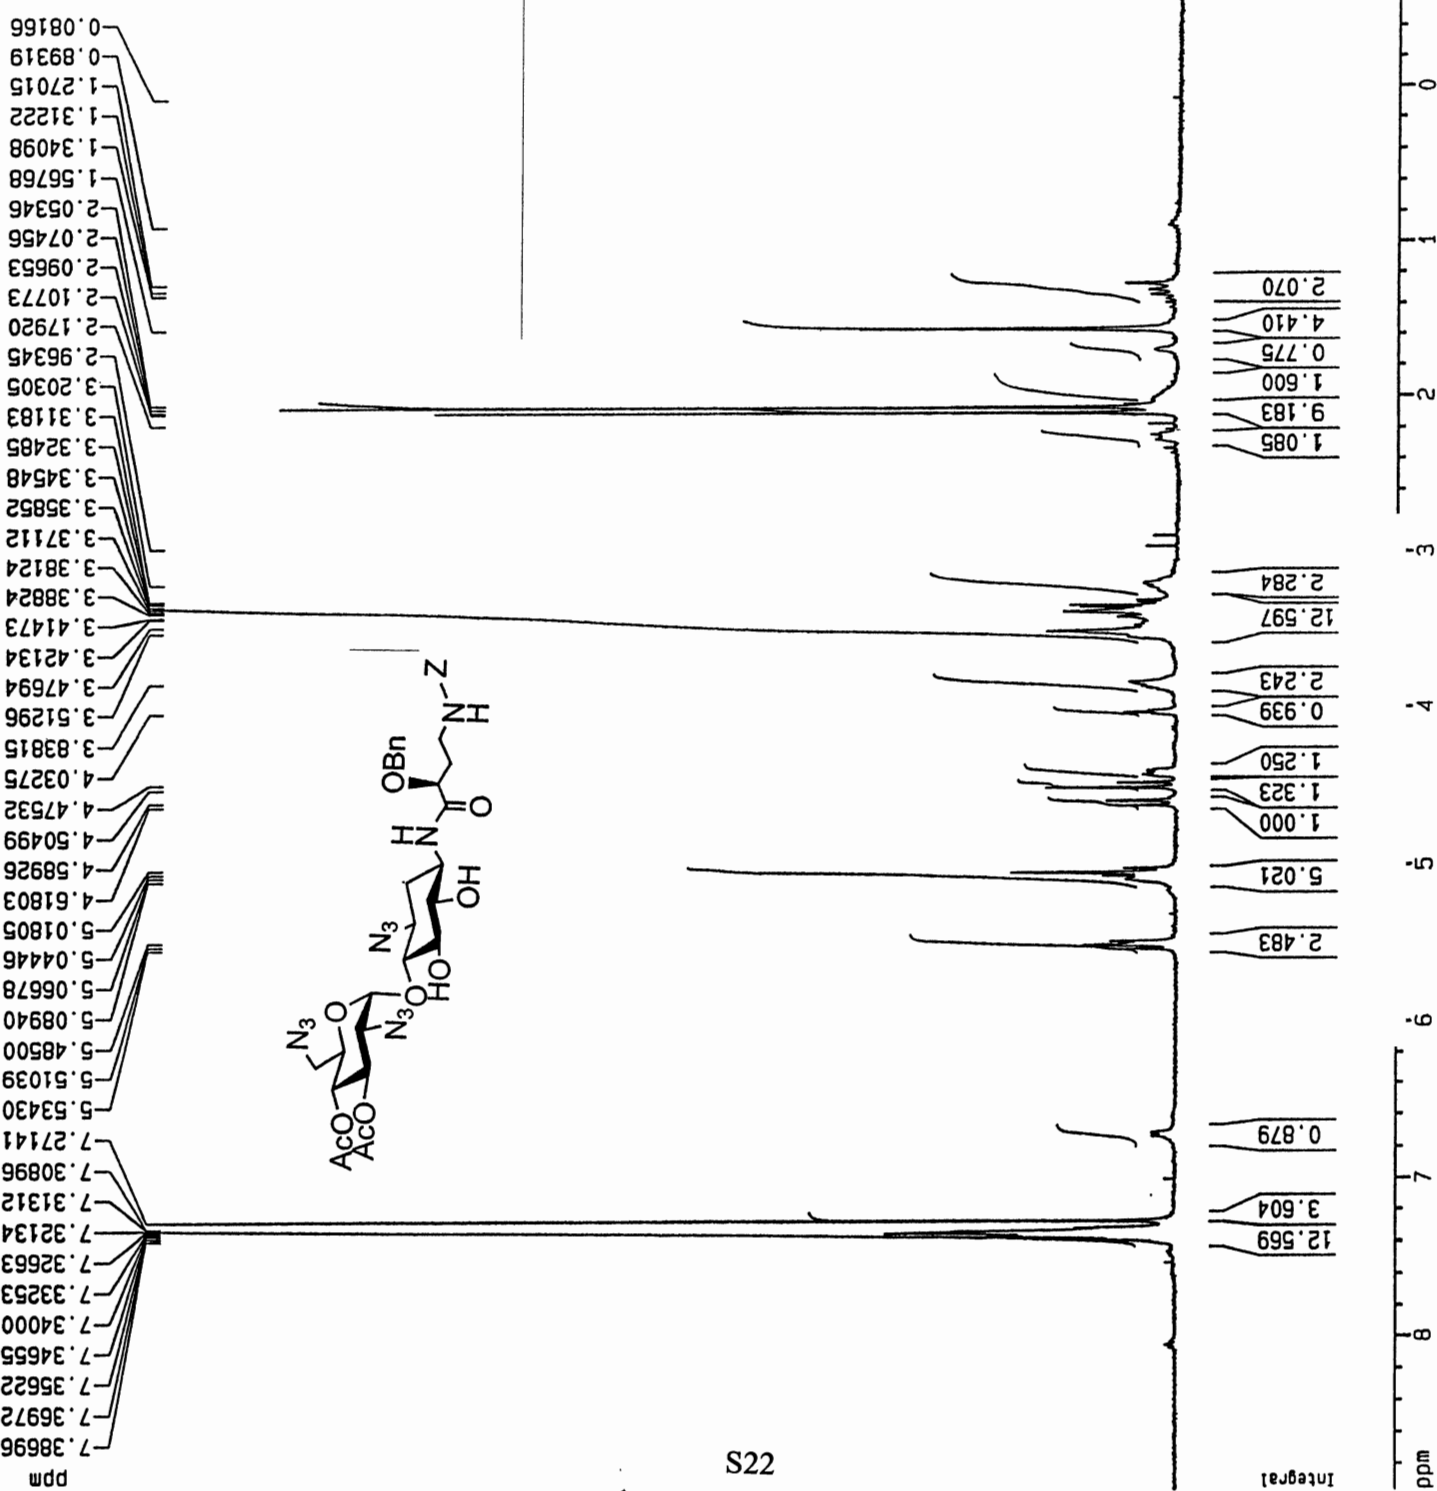

Standard Proton Experiment

Current Data Parameters  
 NAME 020106-1  
 EXPNO 1  
 PROCNO 1

F2 - Acquisition Parameters  
 Date\_ 500000  
 Time 9.50  
 INSTRUM arx400  
 PROBHD 5 mm Multinuc1  
 PULPROG zg  
 TD 32768  
 SOLVENT CDCl3  
 NS 8

DS 0  
 SMH 7246.377 Hz  
 FIDRES 0.221142 Hz  
 AQ 2.2610421 sec  
 RG 2048  
 DM 69.000 usec  
 DE 98.57 usec  
 TE 298.0 K  
 D1 1.00000000 sec  
 P1 4.00 usec  
 DE 98.57 usec  
 SF01 400.1328371 MHz  
 NUCLEUS 1H

F2 - Processing parameters  
 SI 16384  
 SF 400.1300049 MHz  
 WDW EM  
 SSB 0  
 LB 0.10 Hz  
 GB 0  
 PC 1.00

1D NMR plot parameters  
 CX 20.00 cm  
 F1P 8.966 ppm  
 F1 3587.53 Hz  
 F2P -0.633 ppm  
 F2 -253.31 Hz  
 PPMCH 0.47995 ppm/cm  
 HZCM 192.04181 Hz/cm

- 7.38696
- 7.36972
- 7.35622
- 7.34655
- 7.34000
- 7.33253
- 7.32663
- 7.32134
- 7.31312
- 7.30896
- 7.27141
- 5.53430
- 5.51039
- 5.48500
- 5.08940
- 5.06678
- 5.04446
- 5.01805
- 4.61803
- 4.58926
- 4.50499
- 4.47532
- 4.03275
- 3.83815
- 3.51296
- 3.47694
- 3.42134
- 3.41473
- 3.38824
- 3.38124
- 3.37112
- 3.35852
- 3.34548
- 3.32485
- 3.31183
- 3.20305
- 2.96345
- 2.17920
- 2.10773
- 2.09653
- 2.07456
- 2.05346
- 1.56768
- 1.34098
- 1.31222
- 1.27015
- 0.89319
- 0.08166

- 12.569
- 3.604
- 0.879
- 2.483
- 5.021
- 1.000
- 1.323
- 1.250
- 0.939
- 2.243
- 12.597
- 2.284
- 1.085
- 9.183
- 1.600
- 0.775
- 4.410
- 2.070

# Standard 13C Experiment

## 3',4'-Di-O-acetyl-1-N-[(S)-4-(benzyloxycarbonylamino)-2-benzyloxybutanoyl]-3,2',6'-triazidoneamine (14)

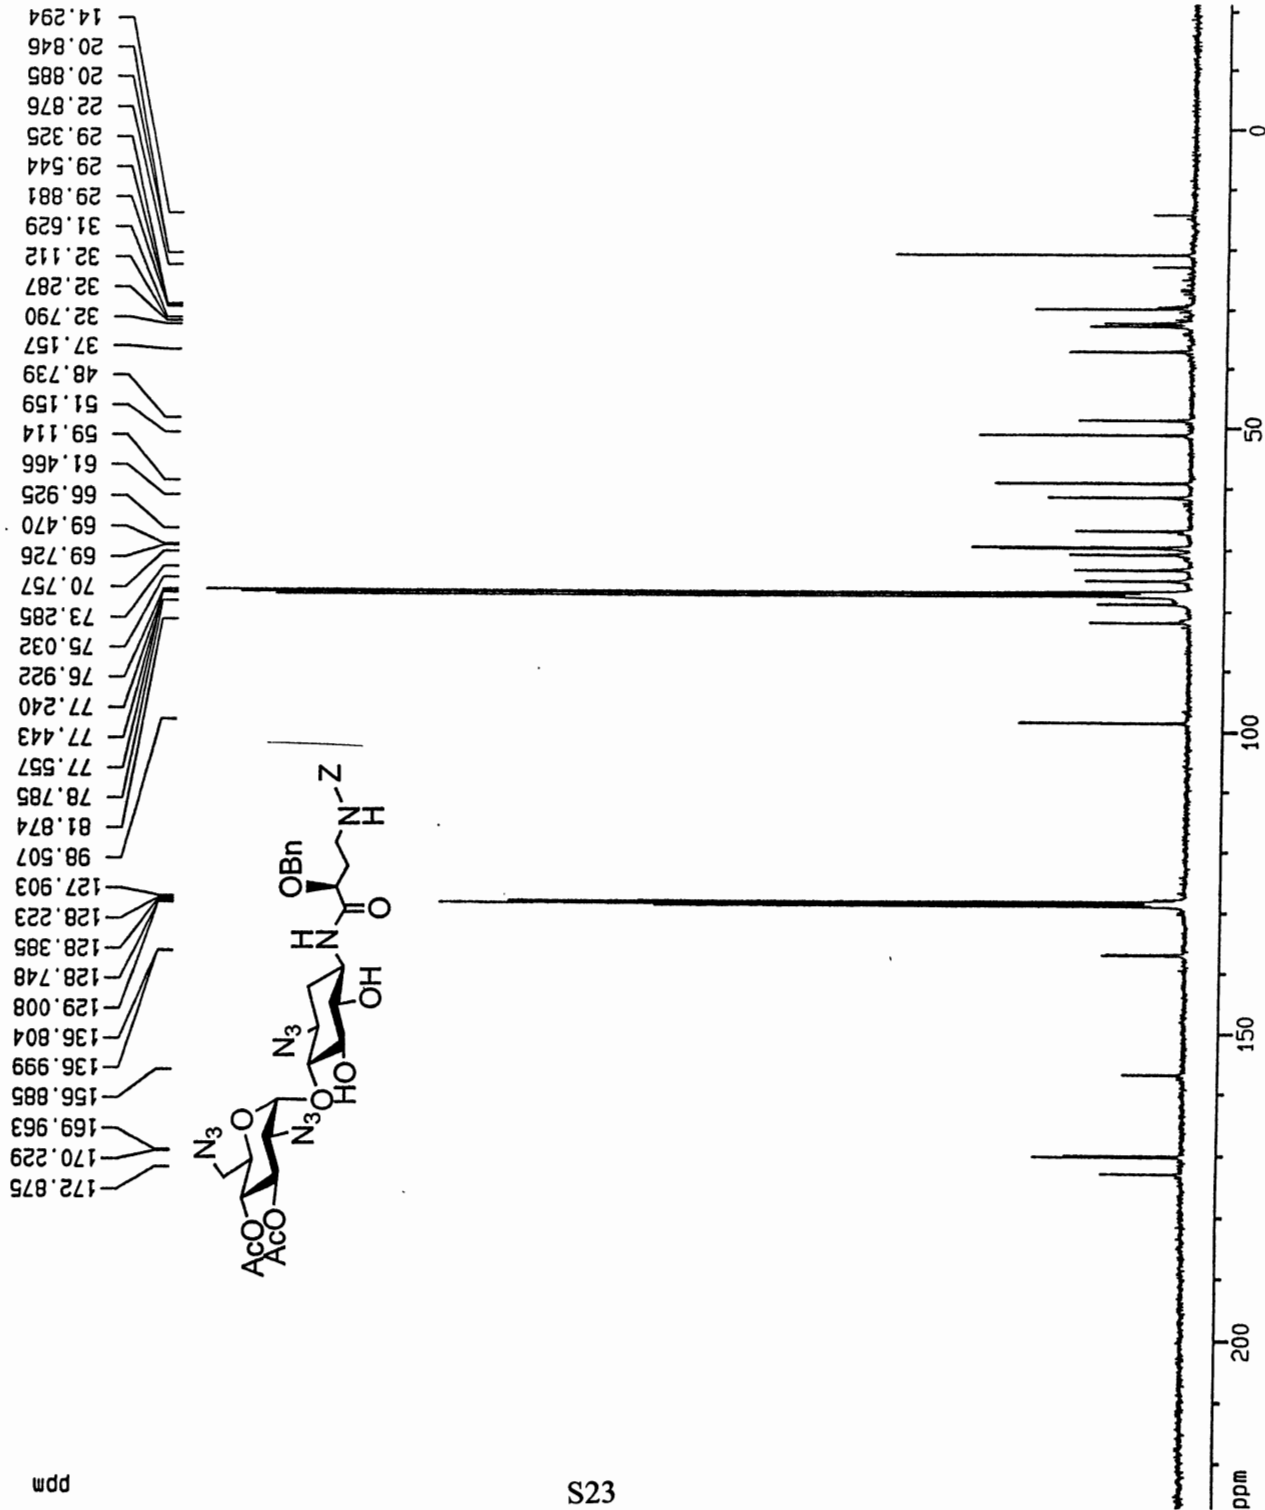

Current Data Parameters  
 NAME 011306-5  
 EXPNO 1  
 PROCNO 1

### F2 - Acquisition Parameters

Date\_ 500000  
 Time 22.28  
 INSTRUM arx400  
 PROBHD 5 mm Multinucl  
 PULPROG zgpg30  
 TD 32768  
 SOLVENT CDCl3  
 NS 30000  
 DS 2  
 SWH 25000.000 Hz  
 FIDRES 0.762939 Hz  
 AQ 0.6554100 sec  
 RG 45500  
 DM 20.000 usec  
 DE 27.14 usec  
 TE 300.0 K  
 D12 0.0002000 sec  
 DLS 20.00 dB  
 CPDPRG waltz16  
 P31 100.00 usec  
 D1 0.40000001 sec  
 P1 6.75 usec  
 DE 27.14 usec  
 SF01 100.6231179 MHz  
 NUCLEUS 13C  
 D11 0.03000000 sec

### F2 - Processing parameters

SI 16384  
 SF 100.6127490 MHz  
 MDW EM  
 SSB 0  
 LB 2.00 Hz  
 GB 0  
 PC 1.40

1D NMR plot parameters  
 CX 20.00 cm  
 F1P 227.296 ppm  
 F1 22868.89 Hz  
 F2P -21.181 ppm  
 F2 -2131.10 Hz  
 PPHCM 12.42387 ppm/cm  
 HZCM 1249.99988 Hz/cm

3',4'-Di-O-acetyl-1-N-[(S)-4-(benzyloxycarbonylamino)-2-benzyloxybutanoyl]-3,2',6'-triazidoneamine (14)

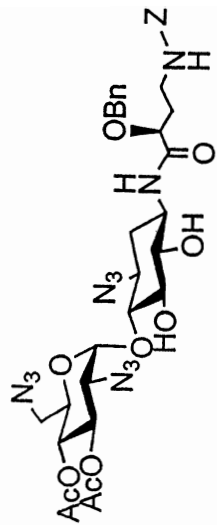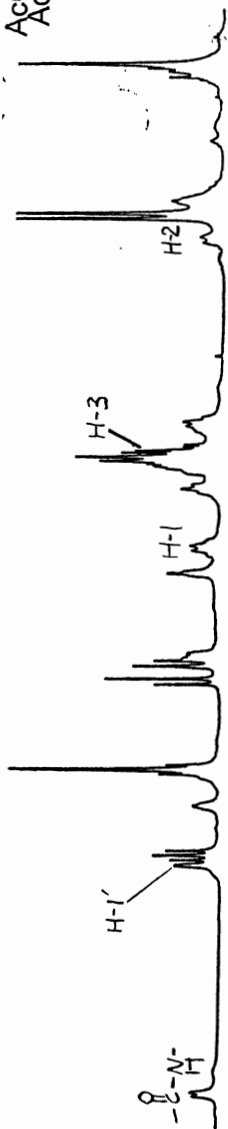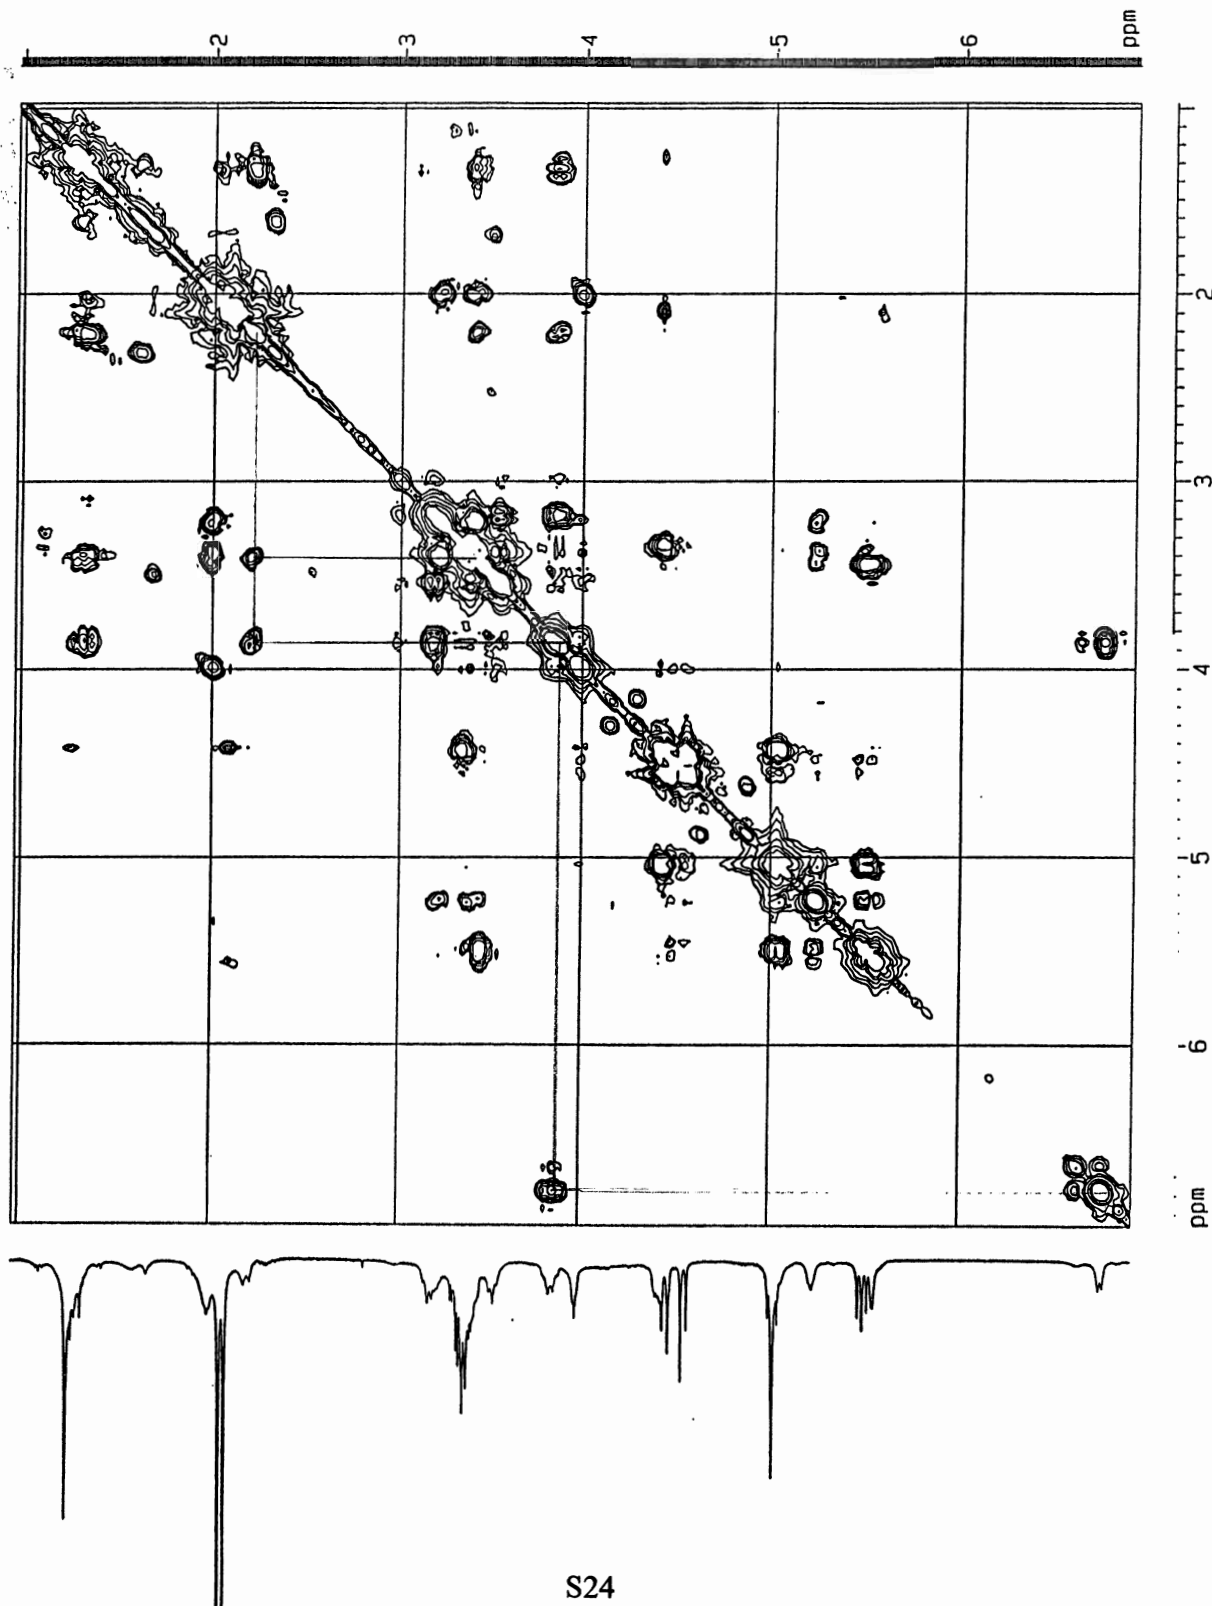



3',4'-Di-O-acetyl-3-N-[(S)-4-(benzyloxycarbonylamino)-2-benzyloxybutanoyl]-1,2',6'-triazidoneamine (15)

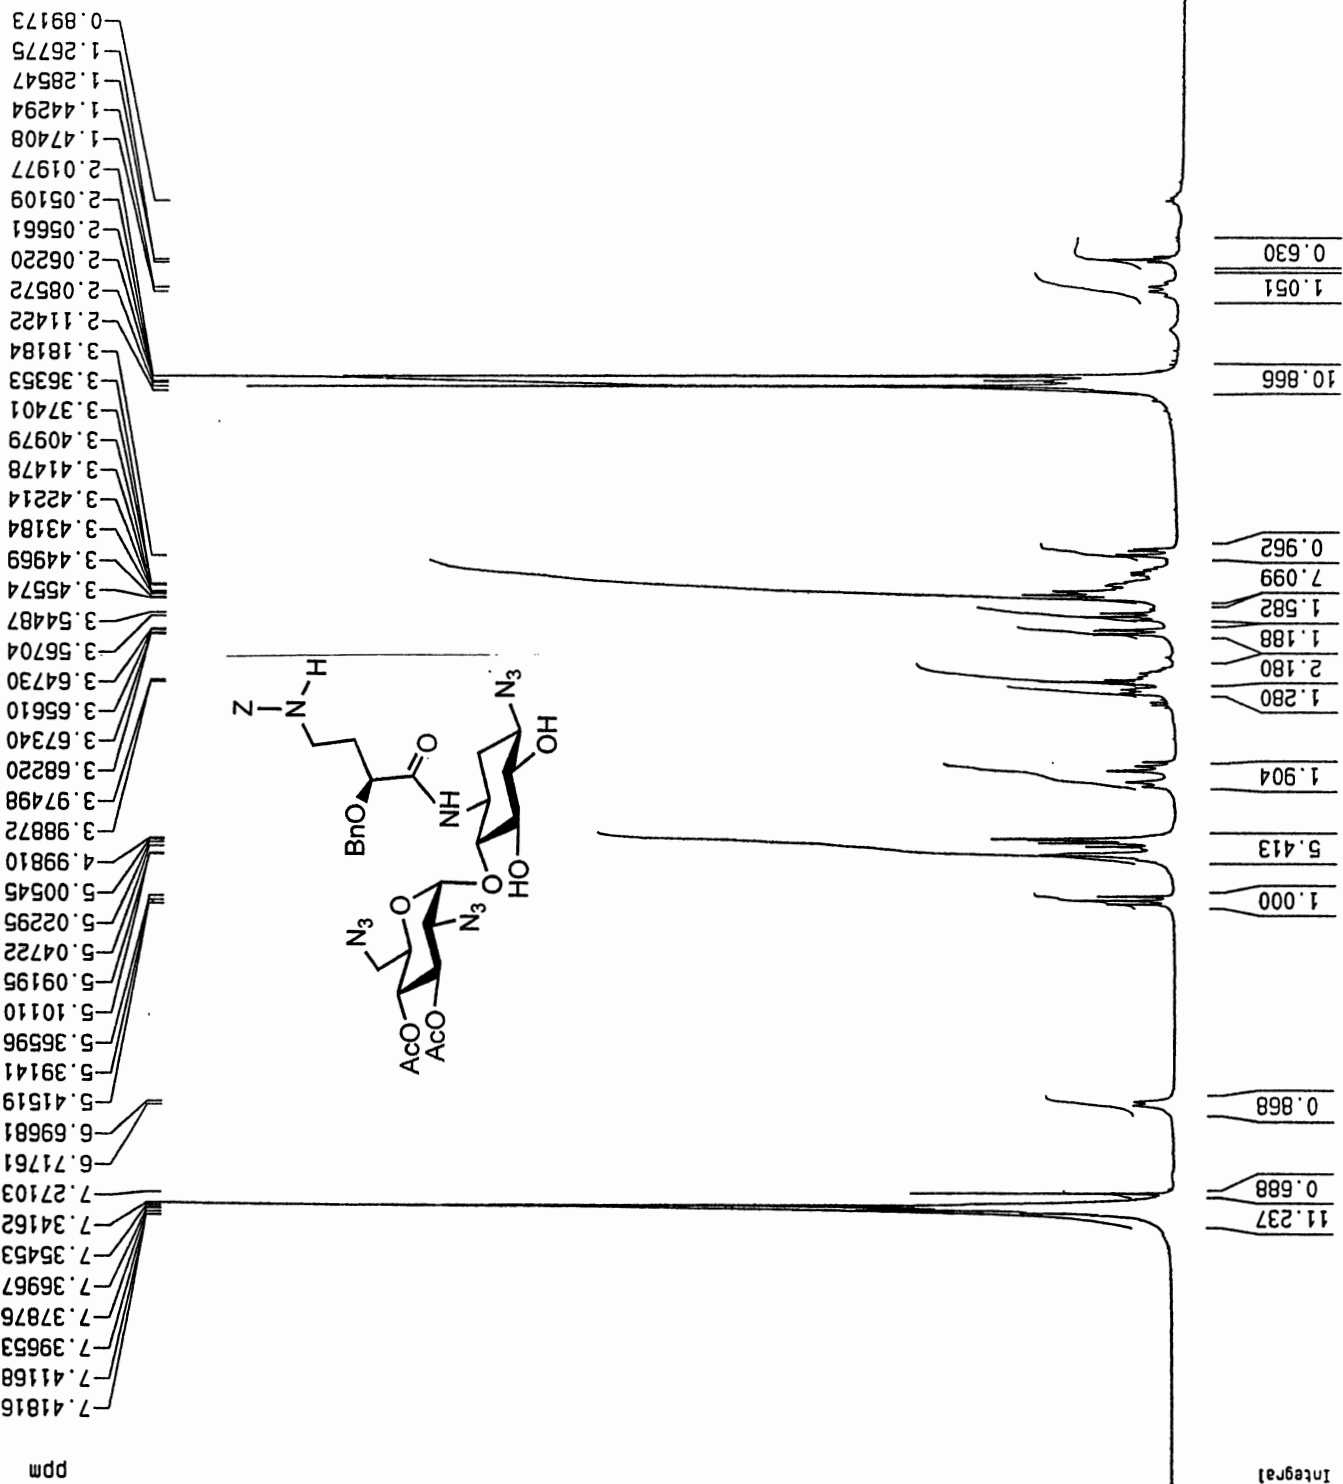

| Chemical Shift (ppm) |
|----------------------|
| 7.41816              |
| 7.41168              |
| 7.39653              |
| 7.37876              |
| 7.36967              |
| 7.35453              |
| 7.34162              |
| 7.27103              |
| 6.71761              |
| 6.69681              |
| 5.41519              |
| 5.39141              |
| 5.36596              |
| 5.10110              |
| 5.09195              |
| 5.04722              |
| 5.02295              |
| 5.00545              |
| 4.99810              |
| 3.98872              |
| 3.97498              |
| 3.68220              |
| 3.67340              |
| 3.65610              |
| 3.64730              |
| 3.56704              |
| 3.54487              |
| 3.45574              |
| 3.44969              |
| 3.43184              |
| 3.42214              |
| 3.41478              |
| 3.40979              |
| 3.37401              |
| 3.36353              |
| 3.18184              |
| 2.11422              |
| 2.08572              |
| 2.06220              |
| 2.05661              |
| 2.05109              |
| 2.01977              |
| 1.47408              |
| 1.44294              |
| 1.28547              |
| 1.26775              |
| 0.89173              |

| Integration |
|-------------|
| 11.237      |
| 0.688       |
| 0.868       |
| 1.000       |
| 5.413       |
| 1.904       |
| 1.280       |
| 2.180       |
| 1.188       |
| 1.582       |
| 7.099       |
| 0.962       |
| 10.866      |
| 1.051       |
| 0.630       |

Standard Proton Experiment

Current Data Parameters  
 NAME 062806-3  
 EXPNO 1  
 PROCNO 1

F2 - Acquisition Parameters  
 Date\_ 500000  
 Time 11.32  
 INSTRUM arx400  
 PROBHD 5 mm Multinucl  
 PULPROG zg  
 TD 32768  
 SOLVENT CDC13  
 NS 8  
 DS 0  
 SWH 7246.377 Hz  
 FIDRES 0.221142 Hz  
 AQ 2.2610421 sec  
 RG 1024  
 DW 69.000 usec  
 DE 98.57 usec  
 TE 298.0 K  
 D1 1.00000000 sec  
 P1 4.00 usec  
 DE 98.57 usec  
 SFO1 400.1328371 MHz  
 NUCLEUS 1H

F2 - Processing parameters  
 SI 16384  
 SF 400.1300049 MHz  
 WDW EM  
 SSB 0  
 LB 0.10 Hz  
 GB 0  
 PC 1.00

1D NMR plot parameters  
 CX 20.00 cm  
 F1P 9.137 ppm  
 F1 3655.81 Hz  
 F2P -0.505 ppm  
 F2 -202.10 Hz  
 PPMCM 0.48208 ppm/cm  
 HZCM 192.89529 Hz/cm

Standard 13C  
Experiment

3',4'-Di-O-acetyl-3-N-[(S)-4-(benzyloxycarbonylamino)-2-benzyloxybutanoyl]-1,2',6'-triazidoneamine (15)

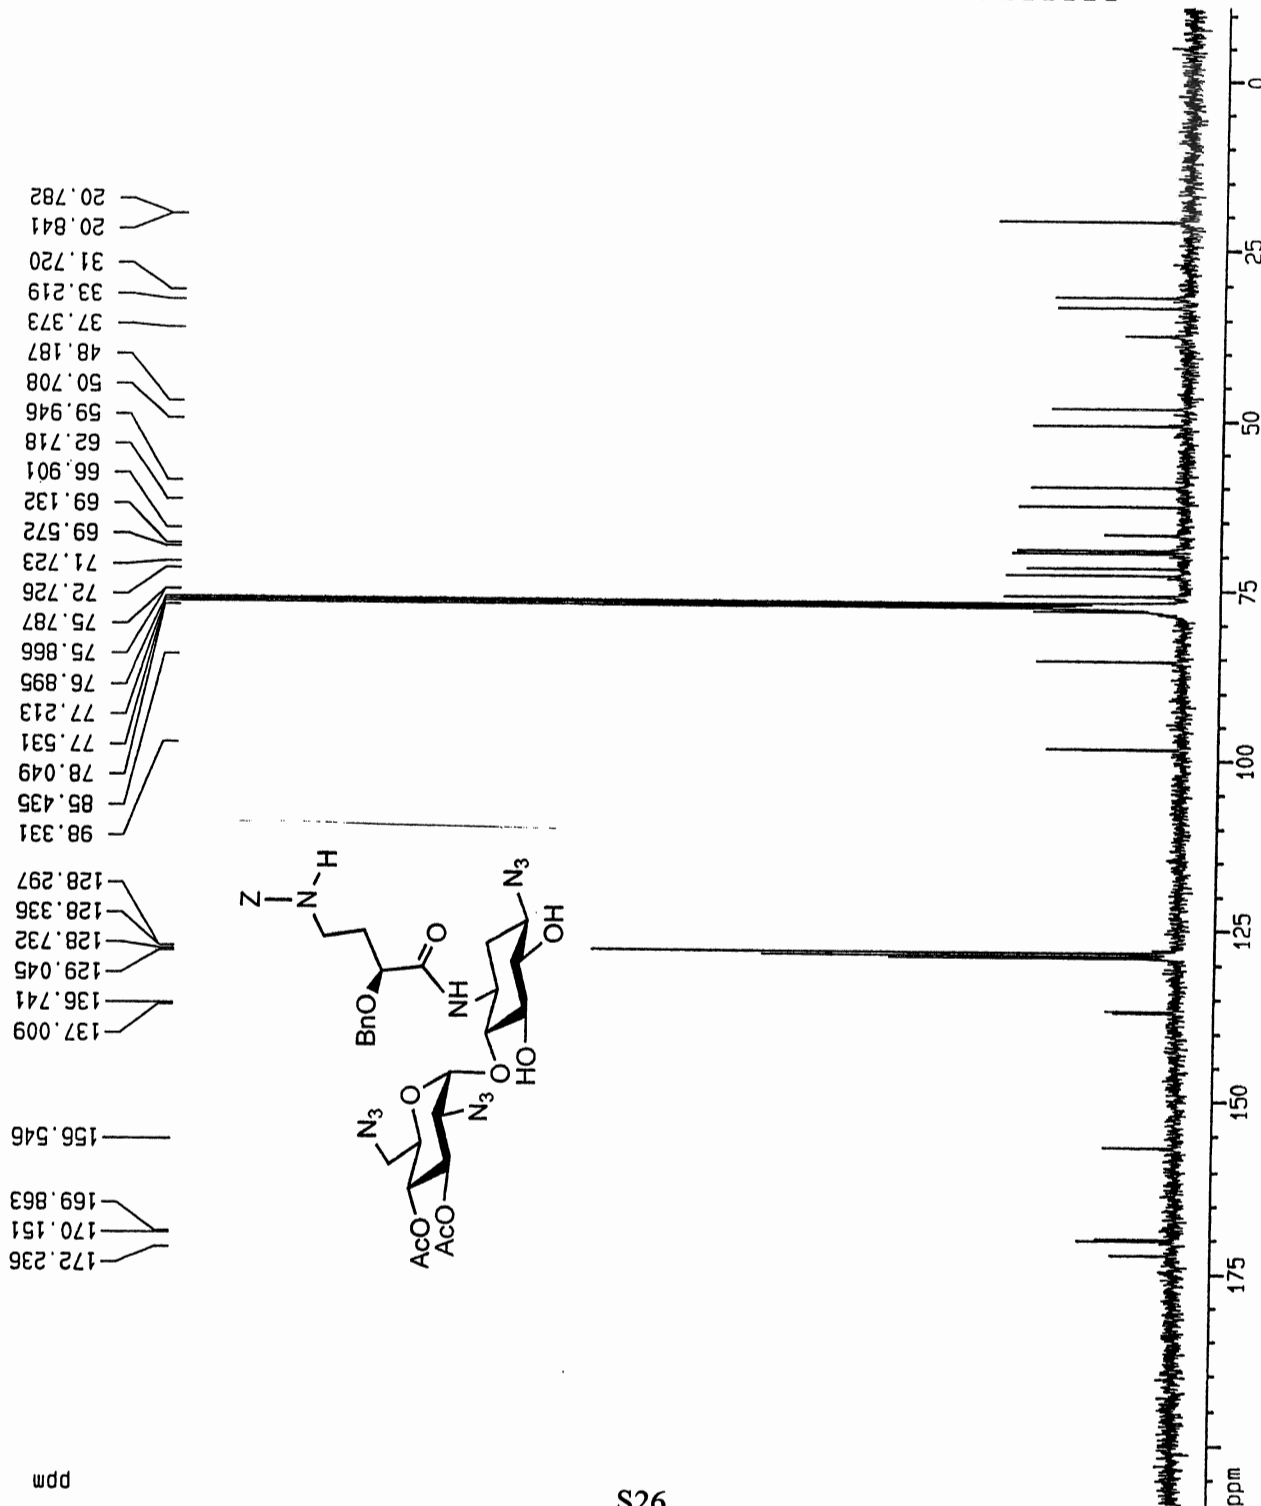

Current Data Parameters  
 NAME 063006-2  
 EXPNO 1  
 PROCNO 1

F2 - Acquisition Parameters  
 Date\_ 500000  
 Time 21.19  
 INSTRUM arx400  
 PROBHD 5 mm Multinucl  
 PULPROG zgpg30  
 TD 32768  
 SOLVENT CDC13  
 NS 7895  
 DS 2  
 SMH 25000.000 Hz  
 FIDRES 0.762939 Hz  
 AQ 0.6554100 sec  
 RG 45500  
 DM 20.000 usec  
 DE 27.14 usec  
 TE 300.0 K  
 D12 0.00002000 sec  
 DL5 20.00 dB  
 CPDPRG walz16  
 P31 100.00 usec  
 D1 0.40000001 sec  
 P1 6.75 usec  
 DE 27.14 usec  
 SFO1 100.6231179 MHz  
 NUCLEUS 13C  
 D11 0.03000000 sec

F2 - Processing parameters  
 SI 16384  
 SF 100.6127490 MHz  
 WDW EM  
 SSB 0  
 LB 2.00 Hz  
 GB 0  
 PC 1.40

1D NMR plot parameters  
 CX 20.00 cm  
 F1P 206.565 ppm  
 F1 20984.32 Hz  
 F2P -11.230 ppm  
 F2 -1129.93 Hz  
 PPMCM 10.98979 ppm/cm  
 HZCM 1105.71252 Hz/cm

3',4'-Di-O-acetyl-3-N-[(S)-4-(benzyloxycarbonylamino)-2-benzyloxybutanoyl]-1,2',6'-triazidoneamine (15)

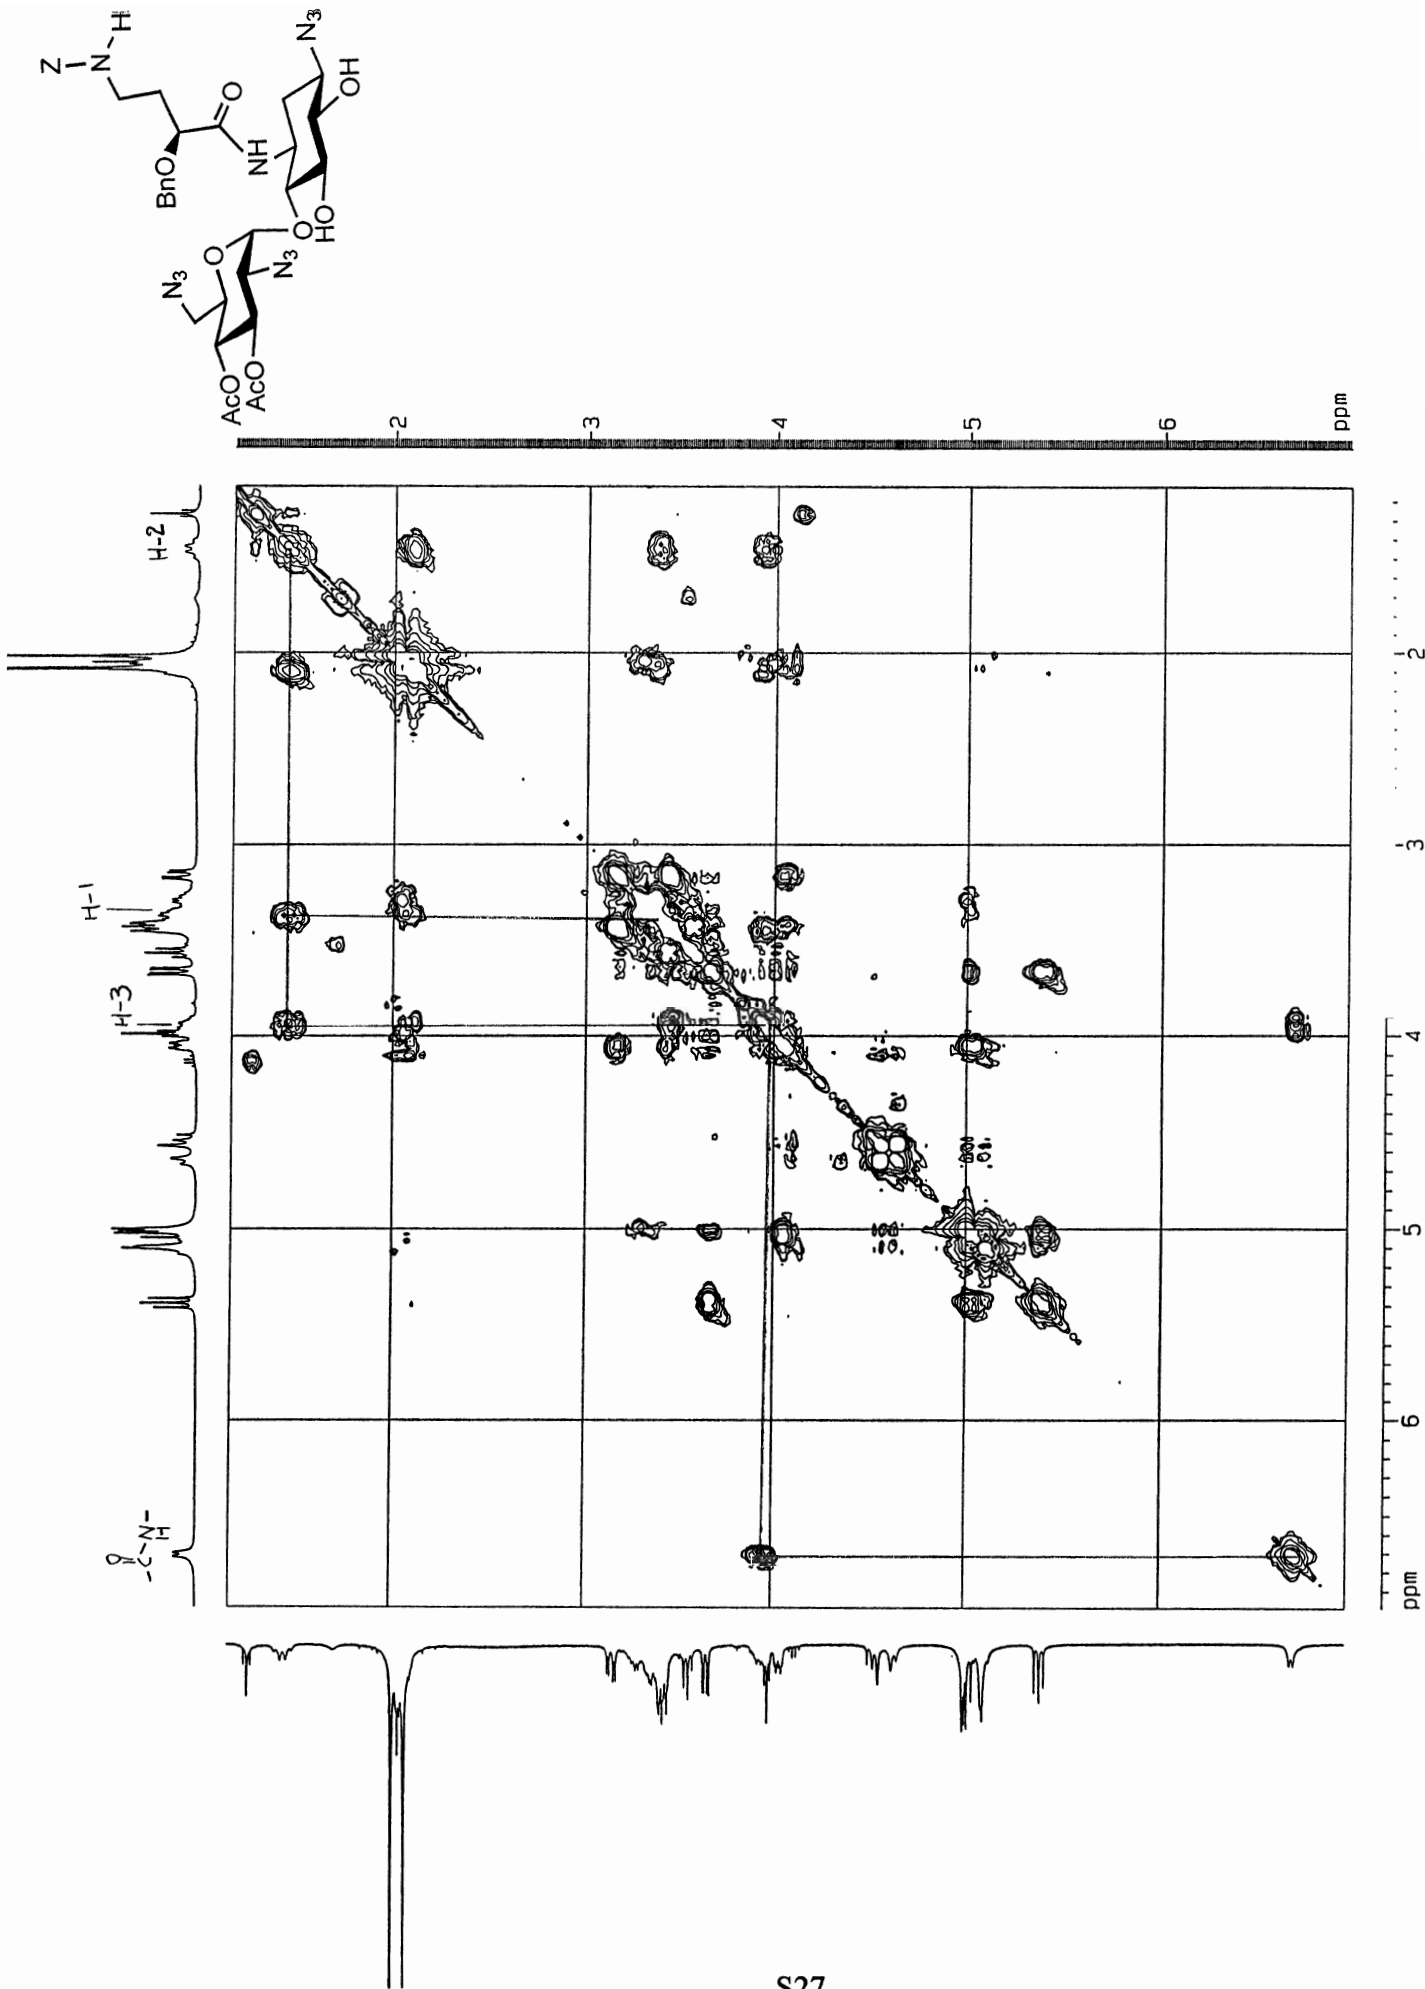

3',4',5,6-Tetra-O-acetyl-1-N-[(S)-4-(benzyloxycarbonylamino)-2-benzyloxybutanoyl]-3,2',6'-triazidoneamine (16)

Standard Proton Experiment

Current Data Parameters  
 NAME 011806-1  
 EXPNO 1  
 PROCNO 1

F2 - Acquisition Parameters  
 Date\_ 500000  
 Time 19.15  
 INSTRUM arx400  
 PROBHD 5 mm Multinuc1  
 PULPROG zg  
 TD 32768  
 SOLVENT CDC13  
 NS 8  
 DS 0  
 SWH 7246.377 Hz  
 FIDRES 0.221142 Hz  
 AQ 2.2610421 sec  
 RG 360  
 DM 69.000 usec  
 DE 98.57 usec  
 TE 298.0 K  
 D1 1.0000000 sec  
 P1 4.00 usec  
 DE 98.57 usec  
 SF01 400.1328371 MHz  
 NUCLEUS 1H

F2 - Processing parameters  
 SI 16384  
 SF 400.1300049 MHz  
 NDW EM  
 SSB 0  
 LB 0.10 Hz  
 GB 0  
 PC 1.00

1D NMR plot parameters  
 CX 20.00 cm  
 F1P 9.755 ppm  
 F1 3903.33 Hz  
 F2p -0.420 ppm  
 F2 -167.95 Hz  
 PPMCM 0.50875 ppm/cm  
 HZCM 203.56430 Hz/cm

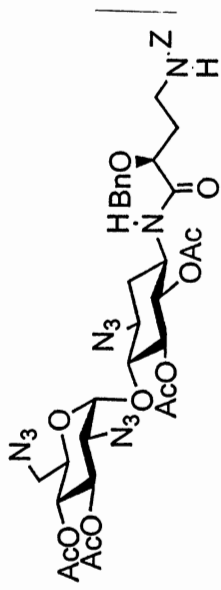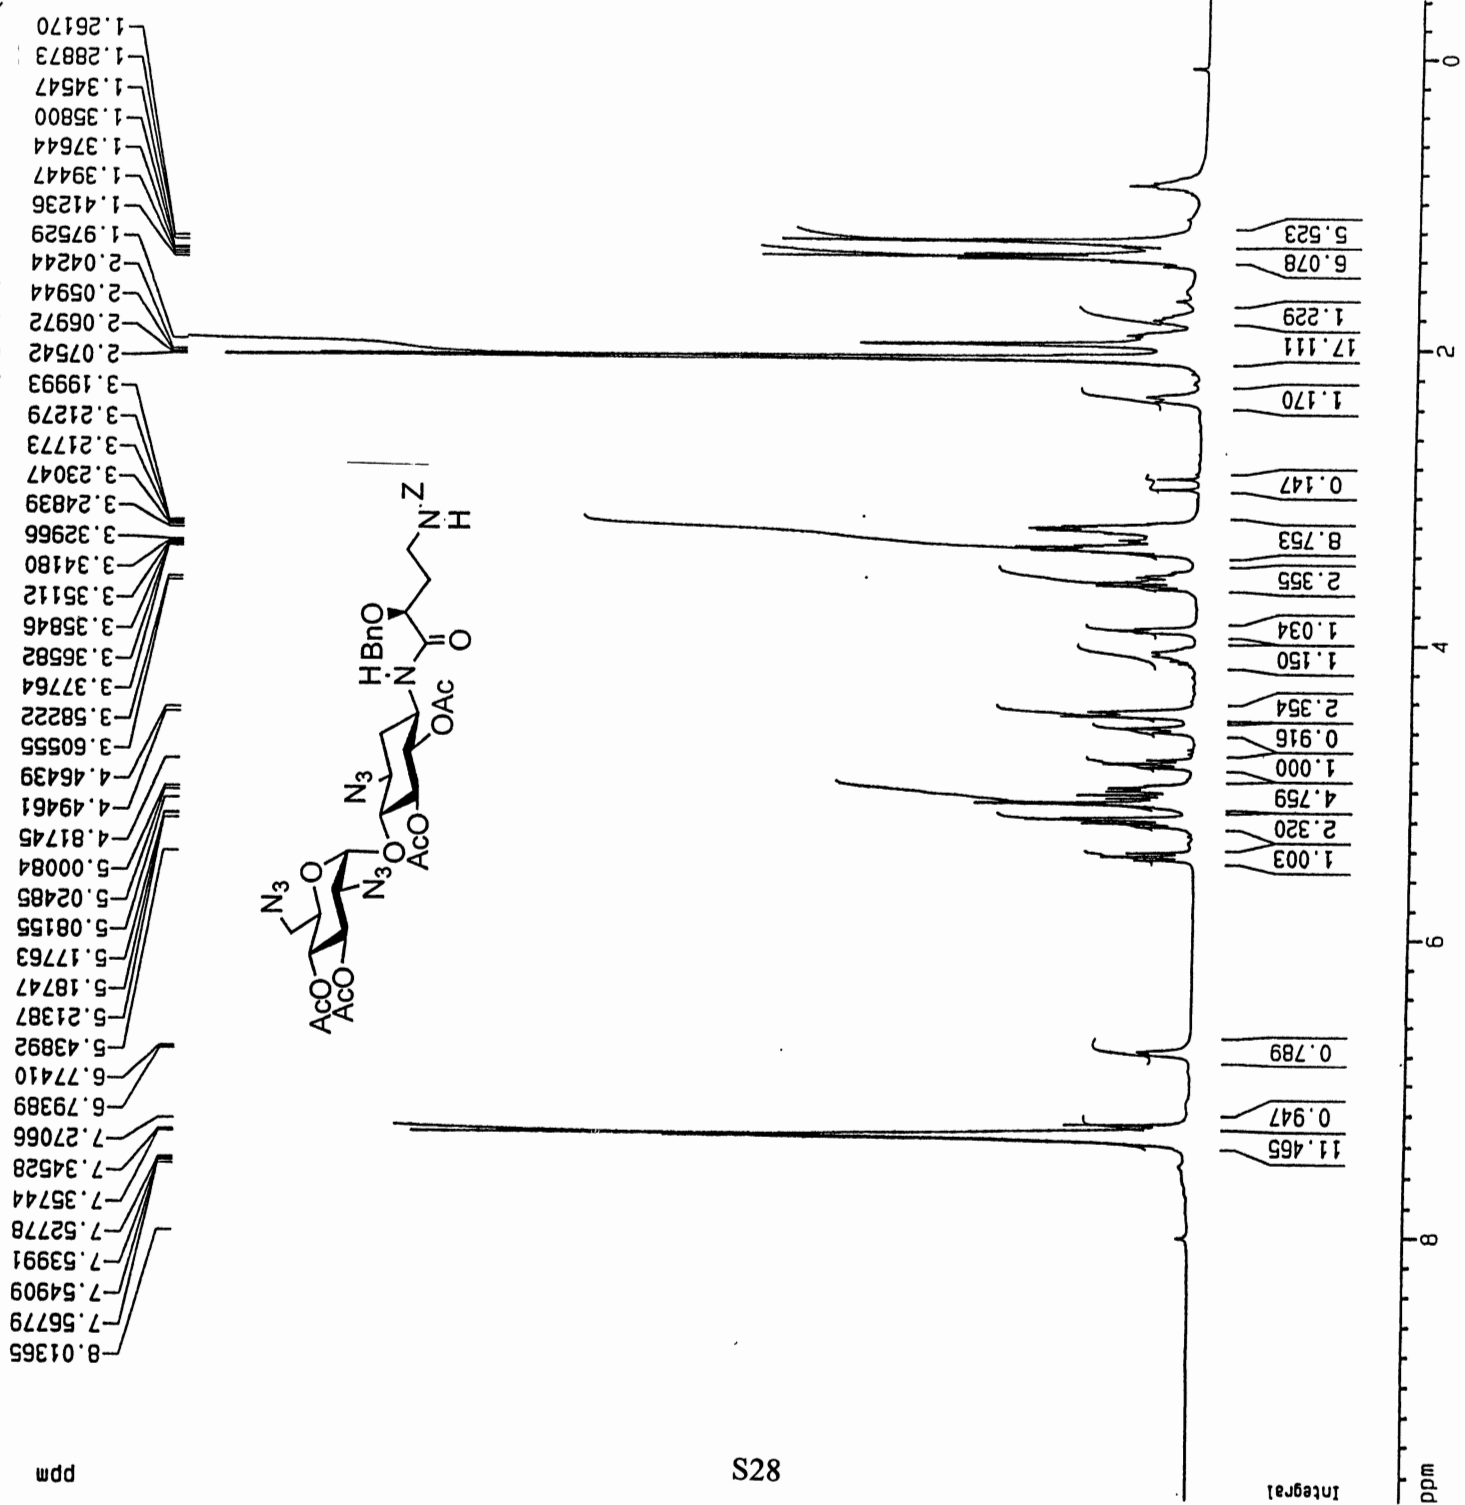



3',4',5,6-Tetra-O-acetyl-1-N-[(S)-4-(benzyloxycarbonylamino)-2-benzyloxybutanoyl]-3,2',6'-triazidoneamine (16)

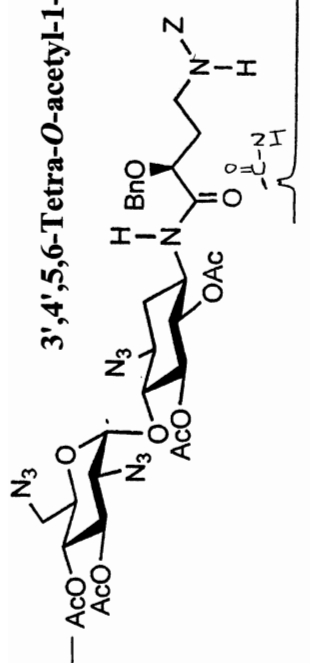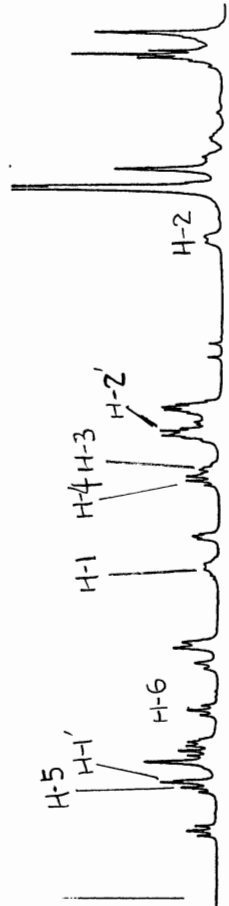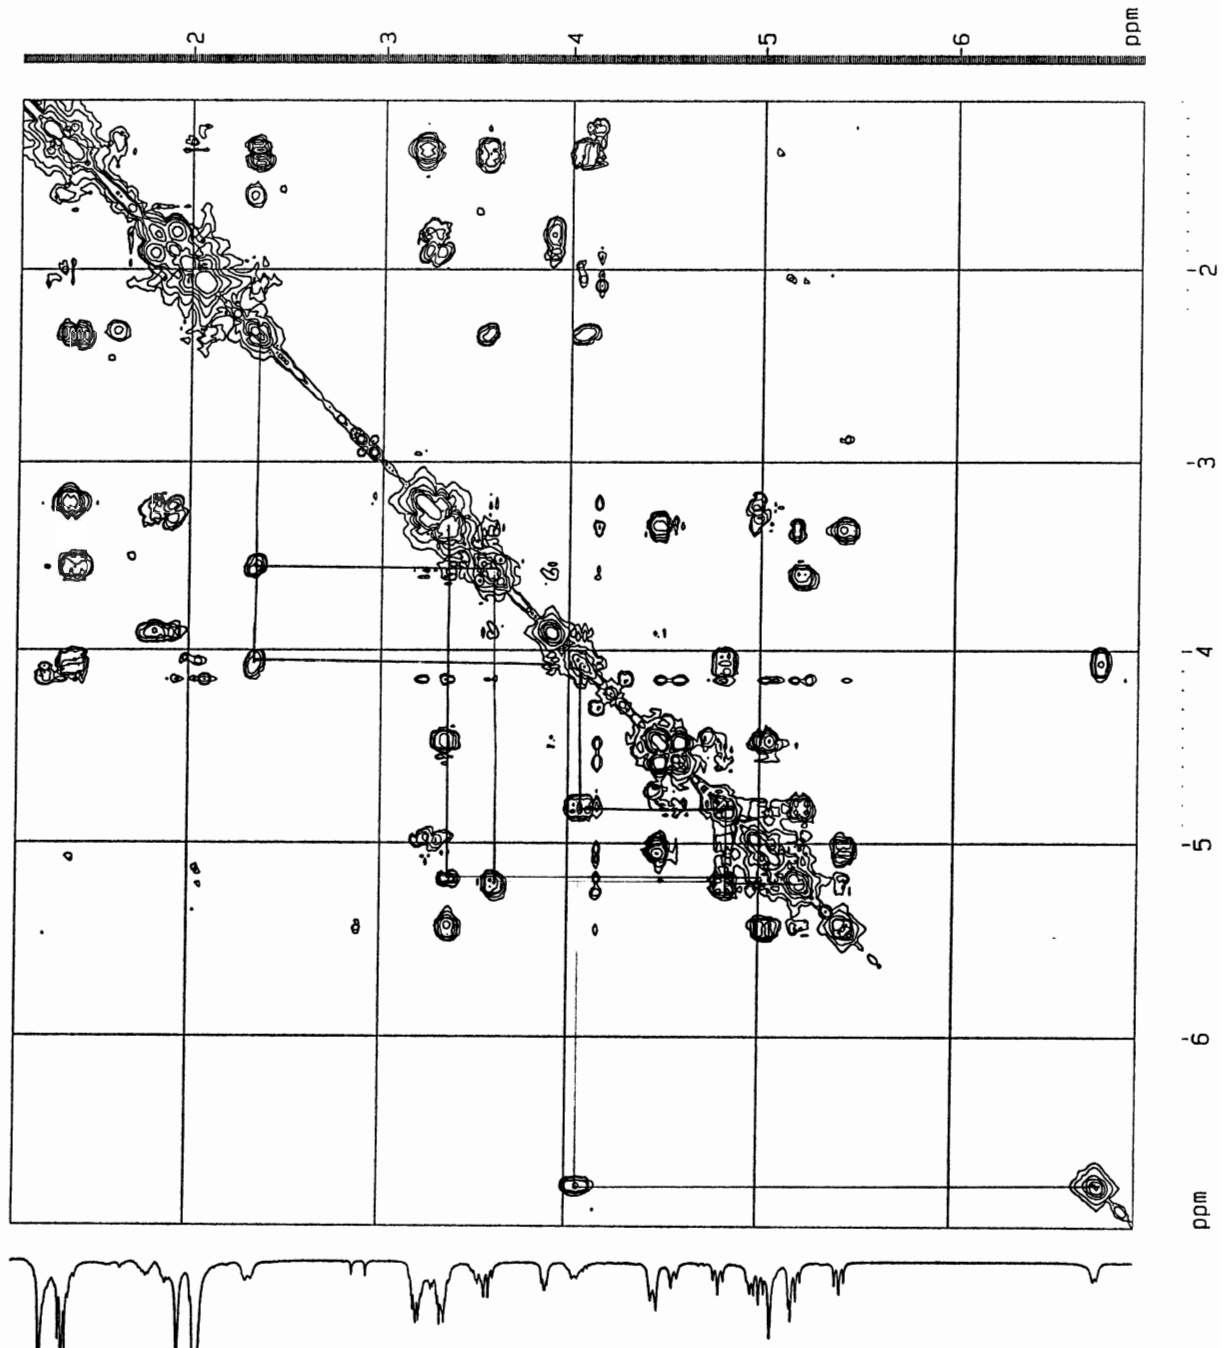

3',4',5,6-Tetra-O-acetyl-3-N-[(S)-4-(benzyloxycarbonylamino)-2-benzyloxybutanoyl]-1,2',6'-triazidoneamine (17)

Standard Protocol Experiment

Current Data Parameters  
 NAME 070705-3  
 EXPNO 1  
 PROCNO 1

F2 - Acquisition Parameters  
 Date\_ 500000  
 Time 21.28  
 INSTRUM arx400  
 PROBHD 5 mm Multinuc1  
 PULPROG zg  
 TD 32768  
 SOLVENT COC13  
 NS 8  
 DS 0  
 SWH 7246.377 Hz  
 FIDRES 0.221142 Hz  
 AQ 2.2610421 sec  
 RG 256  
 DH 69.000 usec  
 DE 96.57 usec  
 TE 298.0 K  
 D1 1.0000000 sec  
 P1 4.00 usec  
 DE 96.57 usec  
 SFO1 400.1326371 MHz  
 NUCLEUS <sup>1</sup>H

F2 - Processing parameters  
 SI 16384  
 SF 400.1300049 MHz  
 WDW EM  
 SSB 0  
 LB 0.10 Hz  
 GB 0  
 PC 1.00

1D NMR plot parameters  
 CX 20.00 cm  
 F1P 8.582 ppm  
 F1 3433.90 Hz  
 F2P -0.676 ppm  
 F2 -270.38 Hz  
 PPMCM 0.46288 ppm/cm  
 HZCM 185.21362 Hz/cm

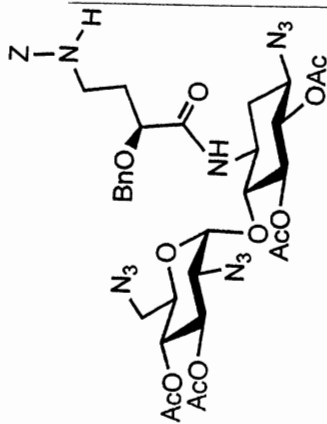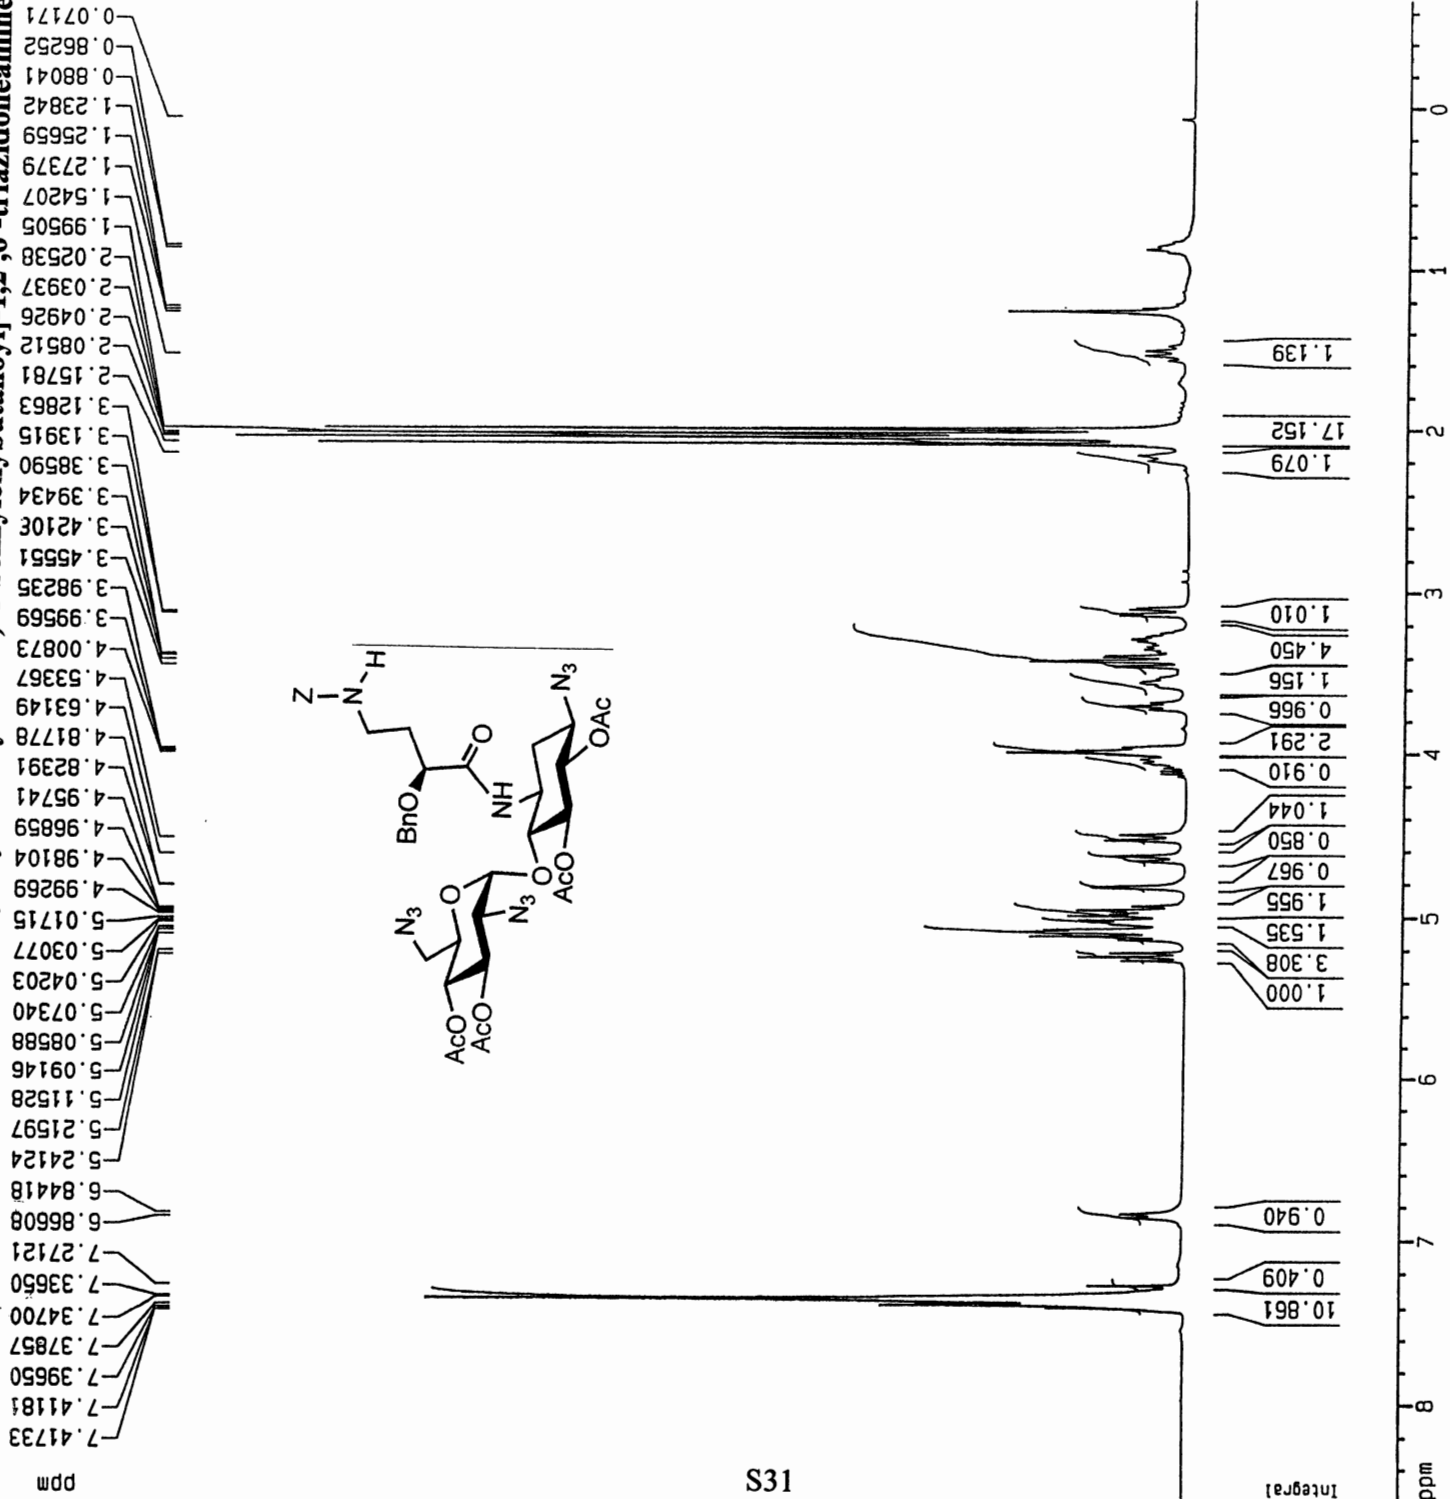

Standard 1H  
Experiment

3',4',5,6-Tetra-O-acetyl-3-N-[(S)-4-(benzyloxycarbonylamino)-2-benzyloxybutanoyl]-1,2',6'-triazidoneamine (17)

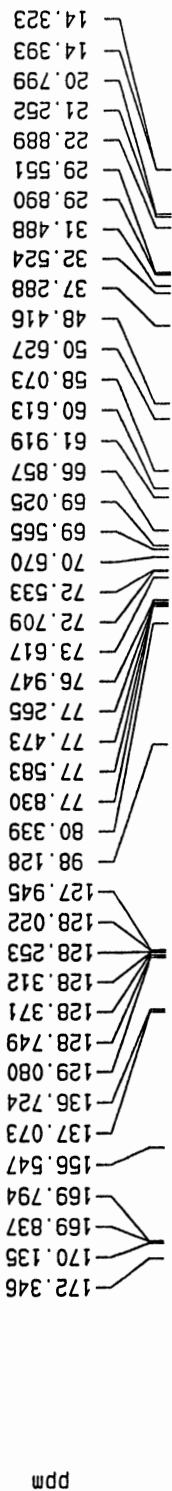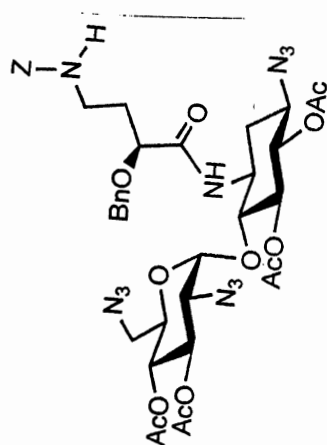

Current Data Parameters  
NAME 070706-4  
EXPNO 1  
PROCNO 1

F2 - Acquisition Parameters  
Date\_ 500000  
Time 23.02

INSTRUM arx400  
PROBHD 5 mm Multinucl  
PULPROG zgdc30  
TD 32768  
SOLVENT CDC13  
NS 20000  
DS 2

SWH 25000.000 Hz  
FIDRES 0.762939 Hz  
AQ 0.6554100 sec  
RG 49500  
DM 20.000 usec  
DE 27.14 usec  
TE 300.0 K

D12 0.00002000 sec  
DL5 20.00 dB  
CPDPRG waltz16  
P31 100.00 usec  
D1 0.40000001 sec  
P1 6.75 usec

DE 27.14 usec  
SFO1 100.6231179 MHz  
NUCLEUS 13C  
D11 0.03000000 sec

F2 - Processing parameters  
SI 16384  
SF 100.6127490 MHz  
WDW EM  
SSB 0  
LB 2.00 Hz  
GB 0  
PC 1.40

ID NMR plot parameters  
CX 20.00 cm  
F1P 206.517 ppm  
F1 20776.20 Hz  
F2P -11.523 ppm  
F2 -1159.37 Hz  
PPMCM 10.90199 ppm/cm  
HZCM 1096.87854 Hz/cm

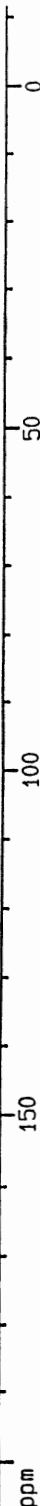



3',4',5,6-Tetra-O-acetyl-3-N-[(S)-4-(benzyloxycarbonylamino)-2-benzyloxybutanoyl]-1,2,6'-triazidoneamine (17)

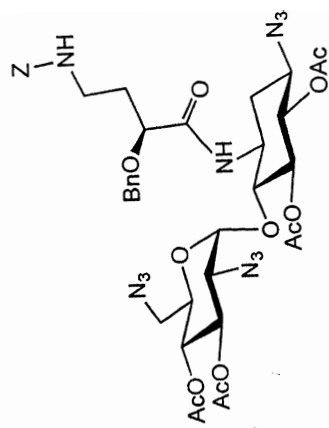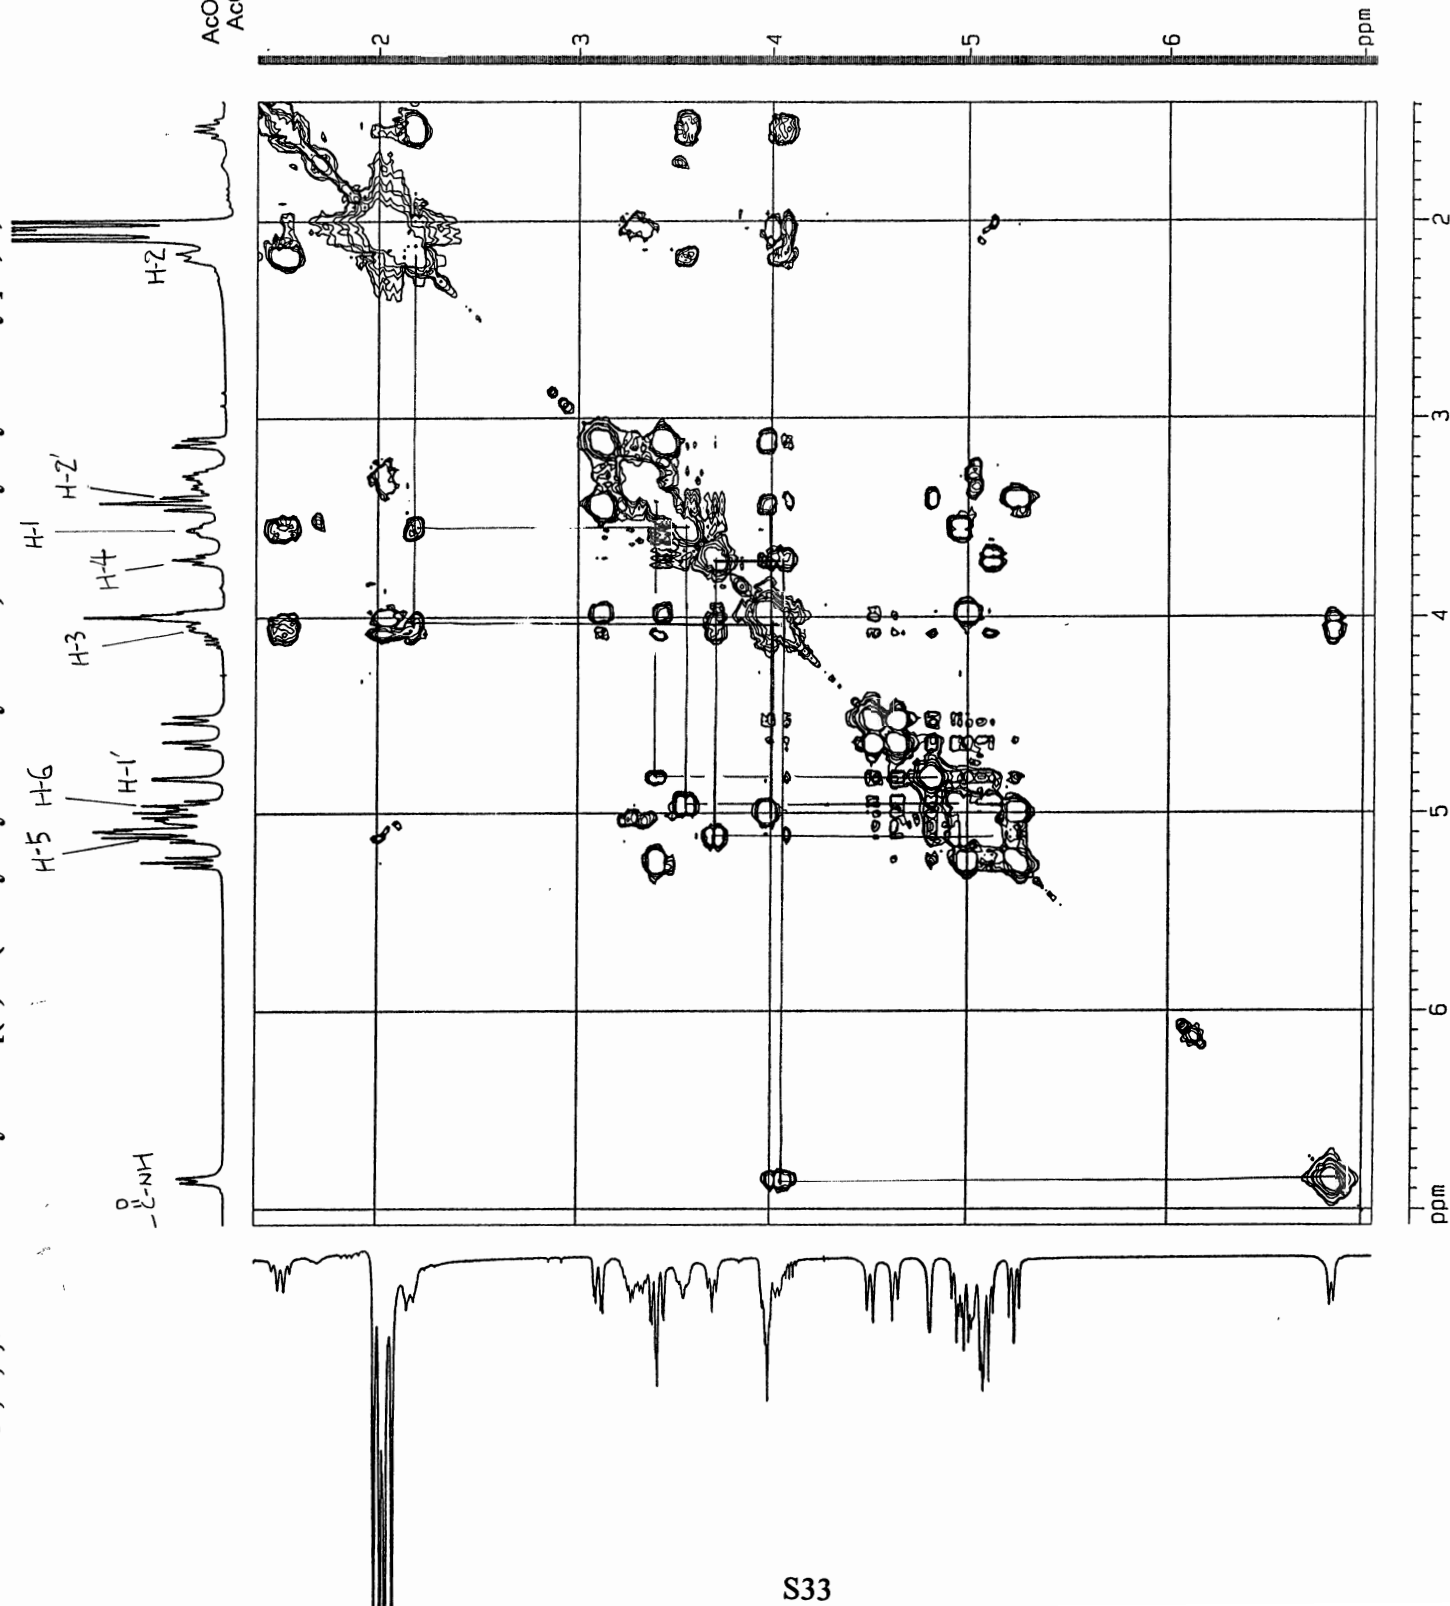

# Standard Proton Experiment

Current Data Parameters  
 NAME 090506-3  
 EXPNO 1  
 PROCNO 1

F2 - Acquisition Parameters  
 Date\_ 500000  
 Time 17.49  
 INSTRUM arx400  
 PROBHD 5 mm Multinucl  
 PULPROG zg  
 TD 32768  
 SOLVENT CDC13  
 NS 8  
 DS 0  
 SWH 7246.377 Hz  
 FIDRES 0.221142 Hz  
 AQ 2.2610421 sec  
 RG 128  
 DW 69.000 usec  
 DE 98.57 usec  
 TE 298.0 K  
 D1 1.0000000 sec  
 P1 4.00 usec  
 DE 98.57 usec  
 SFO1 400.1326371 MHz  
 NUCLEUS 1H

F2 - Processing parameters  
 SI 16384  
 SF 400.1300049 MHz  
 MDW EM  
 SSB 0  
 LB 0.10 Hz  
 GB 0  
 PC 1.00

1D NMR plot parameters  
 CX 20.00 cm  
 F1P 9.097 ppm  
 F1 3640.16 Hz  
 F2P -0.405 ppm  
 F2 -162.17 Hz  
 PPMCM 0.47514 ppm/cm  
 HZCM 190.11665 Hz/cm

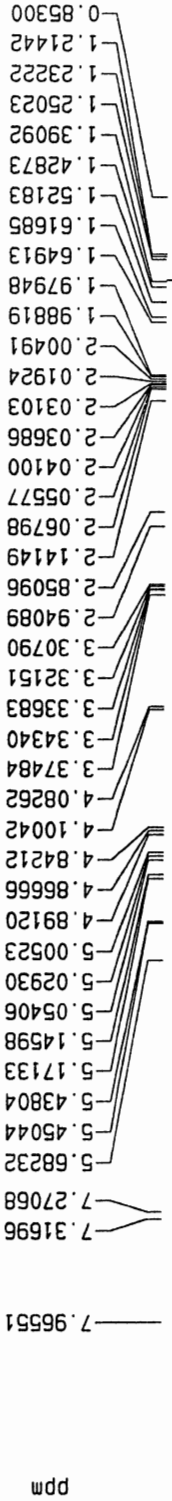

## 3',4',6-Tri-O-acetyl-2'-N-tert-butoxycarbonyl-1,3,6'-triazidoneamine (18)

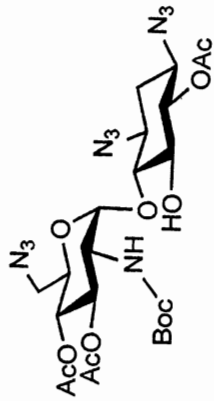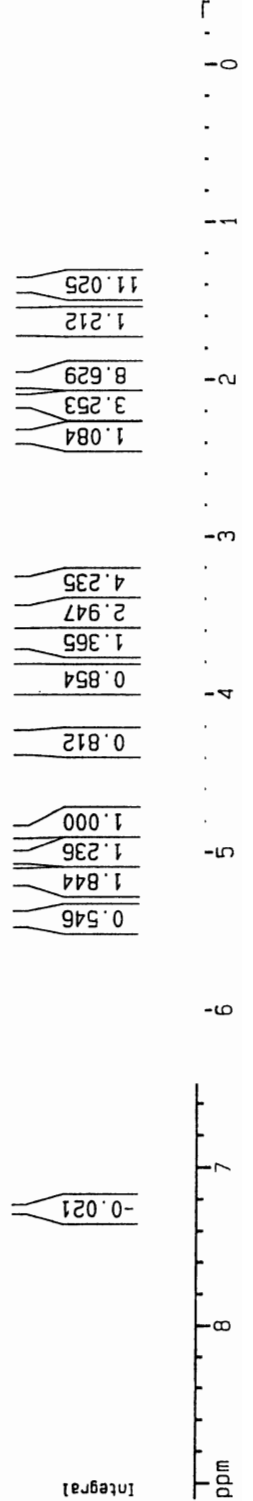

# Standard 13C Experiment

## 3',4',6-Tri-O-acetyl-2'-N-tert-butoxycarbonyl-1,3,6'-triazidoneamine (18)

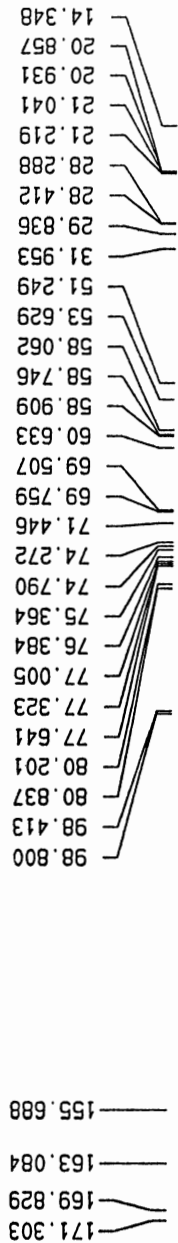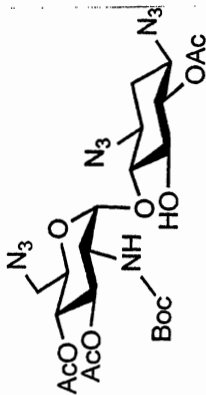

Current Data Parameters  
 NAME 091906-4  
 EXPNO 1  
 PROCNO 1

F2 - Acquisition Parameters

Date\_ 500000  
 Time 22.21  
 INSTRUM arx400  
 PROBHD 5 mm Multinucl  
 PULPROG zgdc30  
 TD 32768  
 SOLVENT CDCl3  
 NS 2694  
 DS 2  
 SWH 25000.000 Hz  
 FIDRES 0.762939 Hz  
 AQ 0.6554100 sec  
 RG 45500  
 DM 20.000 usec  
 DE 27.14 usec  
 TE 300.0 K  
 D12 0.00002000 sec  
 DL5 20.00 dB  
 CPDPRG waltz16  
 P31 100.00 usec  
 D1 0.40000001 sec  
 P1 6.75 usec  
 DE 27.14 usec  
 SFO1 100.6231179 MHz  
 NUCLEUS 13C  
 D11 0.03000000 sec

F2 - Processing parameters

SI 16384  
 SF 100.6127490 MHz  
 WDW EM  
 SSB 0  
 LB 2.00 Hz  
 GB 0  
 PC 1.40

1D NMR plot parameters

CX 20.00 cm  
 F1P 207.488 ppm  
 F1 20875.96 Hz  
 F2P -7.140 ppm  
 F2 -718.39 Hz  
 PPMCH 10.73142 ppm/cm  
 HZCH 1079.71753 Hz/cm

**3',4',6-Tri-*O*-acetyl-2'-*N*-*tert*-butoxycarbonyl-1,3,6'-triazidoneamine (18)**

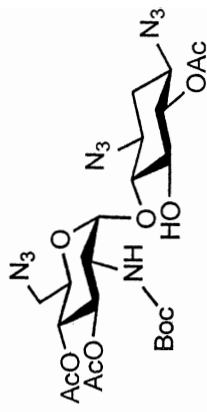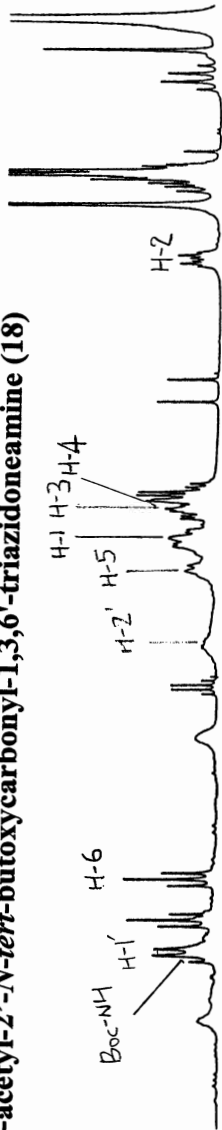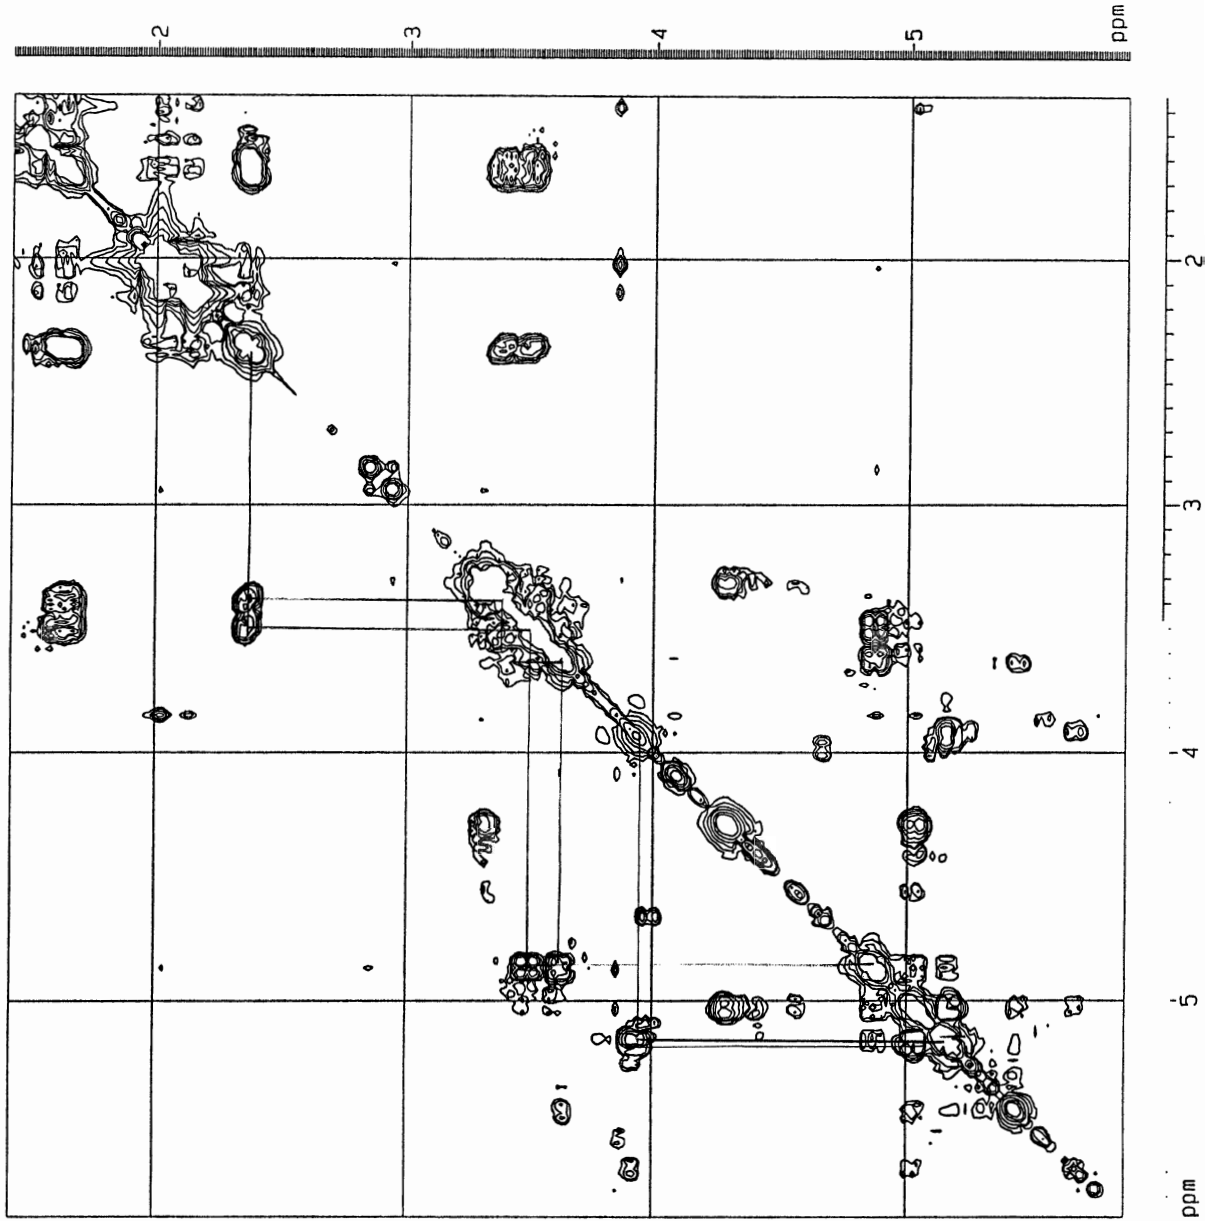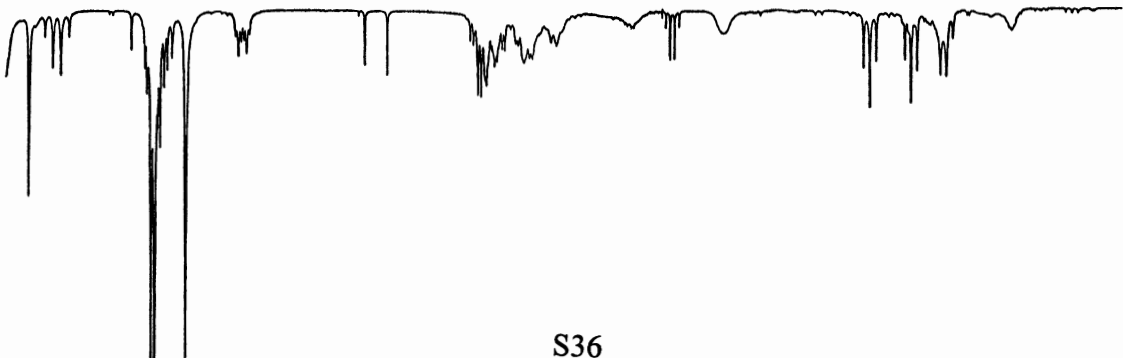

3',4',6-Tri-O-acetyl-1,3,6'-triazidoneamine (19)

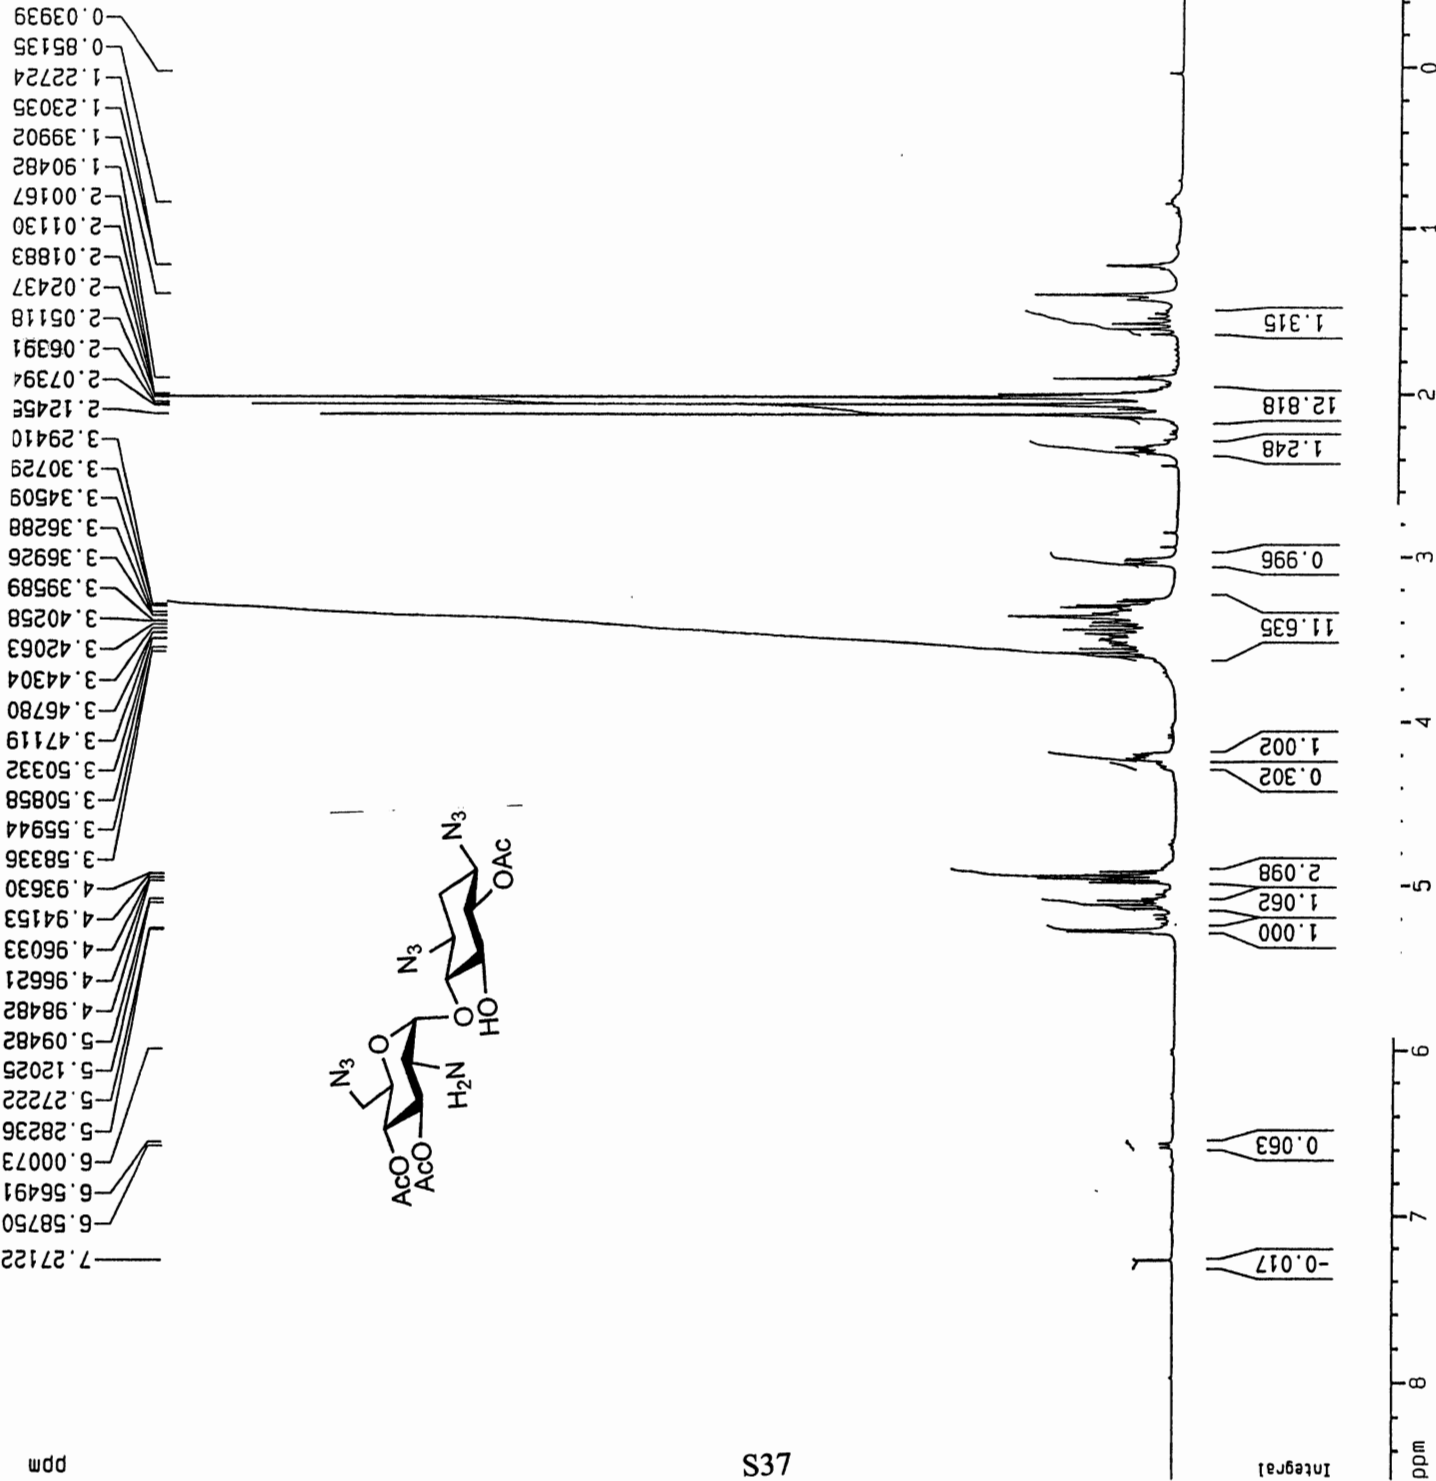

ppm

537

Integral

ppm

Standard Proton Experiment

Current Data Parameters  
 NAME 090406-2  
 EXPNO 1  
 PROCNO 1

F2 - Acquisition Parameters  
 Date\_ 500000  
 Time 11.55  
 INSTRUM arx400  
 PROBHD 5 mm Multinucl  
 PULPROG zg  
 TD 32768  
 SOLVENT CDCl3  
 NS 8  
 DS 0  
 SWH 7246.377 Hz  
 FIDRES 0.221142 Hz  
 AQ 2.2610421 sec  
 RG 90  
 DM 69.000 usec  
 DE 98.57 usec  
 TE 298.0 K  
 D1 1.00000000 sec  
 P1 4.00 usec  
 DE 98.57 usec  
 SFO1 400.1328371 MHz  
 NUCLEUS 1H

F2 - Processing parameters  
 SI 16384  
 SF 400.1300049 MHz  
 EM  
 MDW 0  
 SSB 0  
 LB 0.10 Hz  
 GB 0  
 PC 1.00

ID NMR plot parameters  
 CX 20.00 cm  
 F1P 8.567 ppm  
 F1 3428.11 Hz  
 F2P -0.552 ppm  
 F2 -220.67 Hz  
 PPMCM 0.45595 ppm/cm  
 HZCM 182.43906 Hz/cm

# Standard <sup>13</sup>C Experiment

## 3',4',6-Tri-O-acetyl-1,3,6'-triazidoneamine (19)

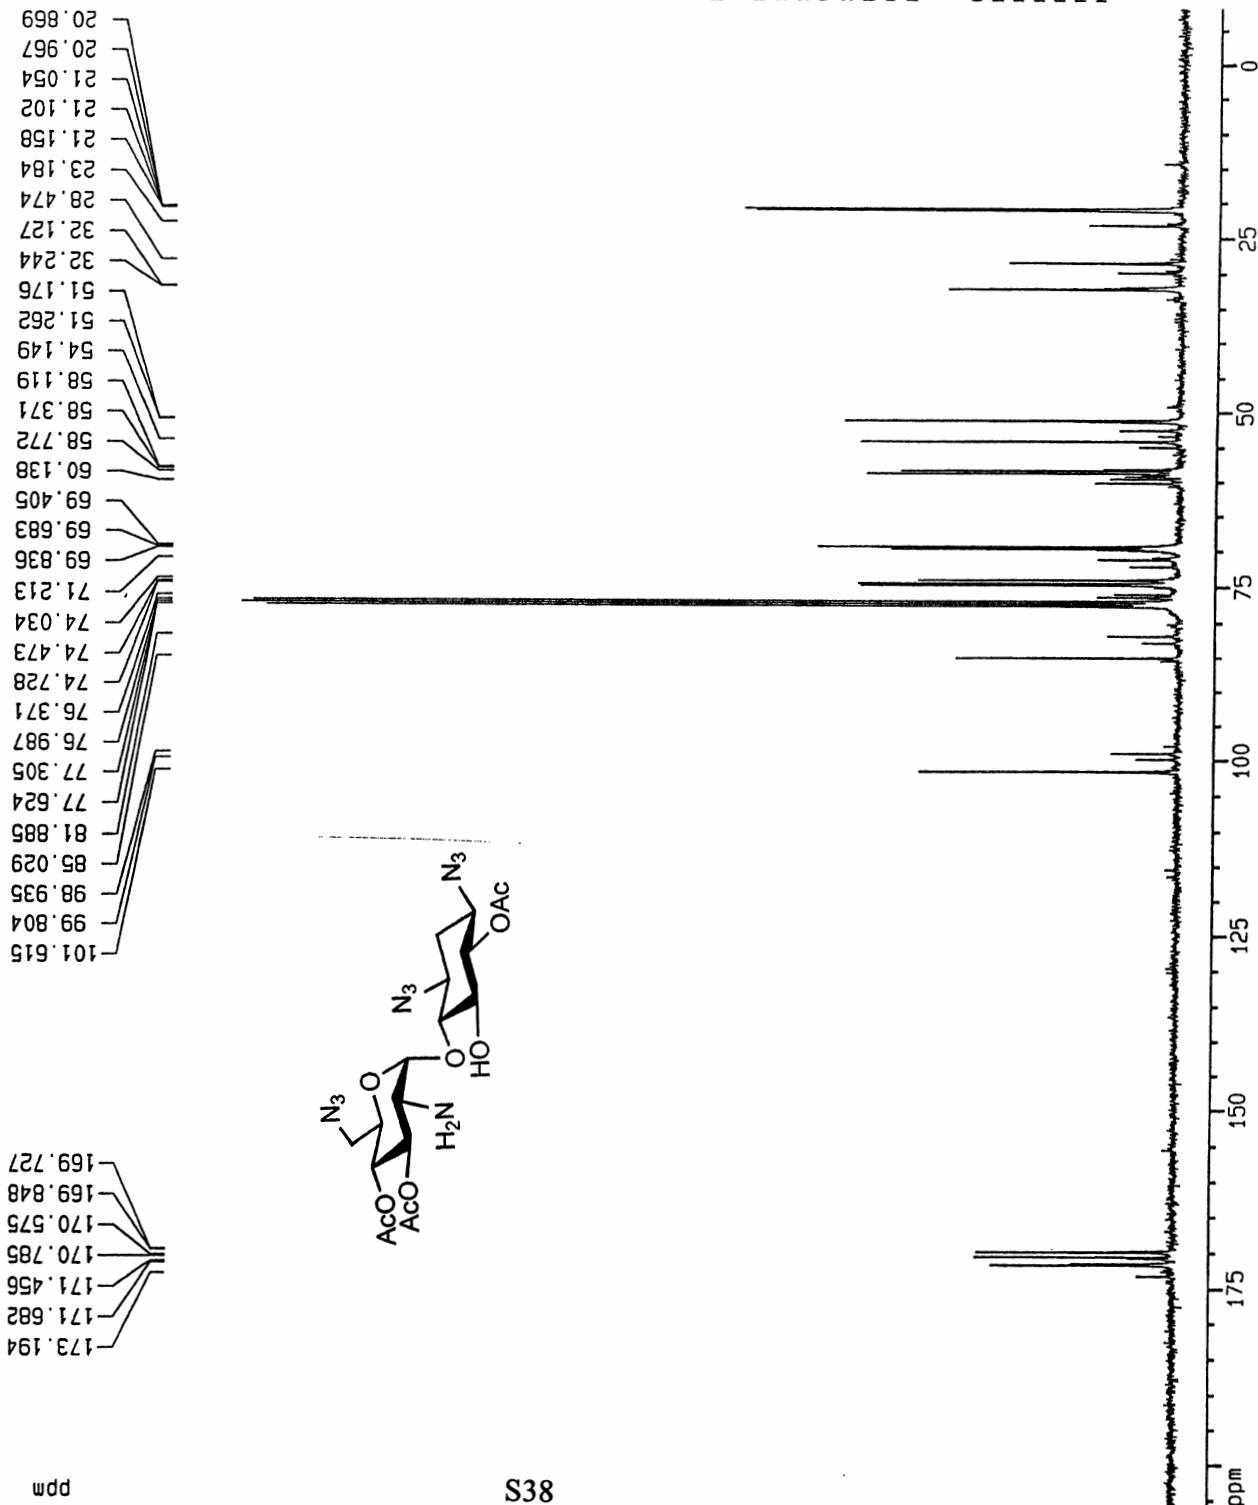

Current Data Parameters  
 NAME 091906-2  
 EXPNO 1  
 PROCNO 1

F2 - Acquisition Parameters  
 Date\_ 500000  
 Time 20.35

INSTRUM arx400  
 PROBHD 5 mm Multinucl  
 PULPROG zgpg30  
 TD 32768  
 SOLVENT CDCl3  
 NS 6441  
 DS 2  
 SWH 25000.000 Hz  
 FIDRES 0.762939 Hz  
 AQ 0.6554100 sec  
 RG 45500  
 DW 20.000 usec  
 DE 27.14 usec  
 TE 300.0 K  
 D12 0.00002000 sec  
 DL5 20.00 dB  
 CPOPRG waltz16  
 P31 100.00 usec  
 D1 0.40000001 sec  
 P1 6.75 usec  
 DE 27.14 usec  
 SFO1 100.6231179 MHz  
 NUCLEUS 13C  
 D11 0.03000000 sec

F2 - Processing parameters  
 SI 16384  
 SF 100.6127490 MHz  
 MDW EM  
 SSB 0  
 LB 2.00 Hz  
 GB 0  
 PC 1.40

1D NMR plot parameters  
 CX 20.00 cm  
 F1P 205.733 ppm  
 F1 20659.37 Hz  
 F2P -8.143 ppm  
 F2 -819.30 Hz  
 PPMCM 10.68381 ppm/cm  
 HZCM 1075.93335 Hz/cm

3',4',6-Tri-O-acetyl-1,3,6'-triazidoneamine (19)

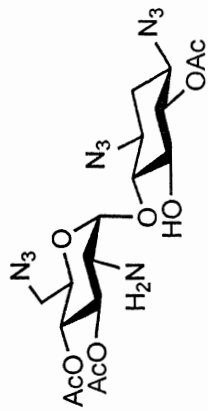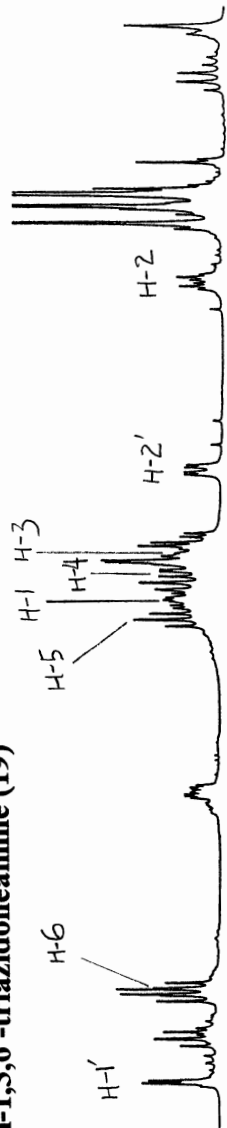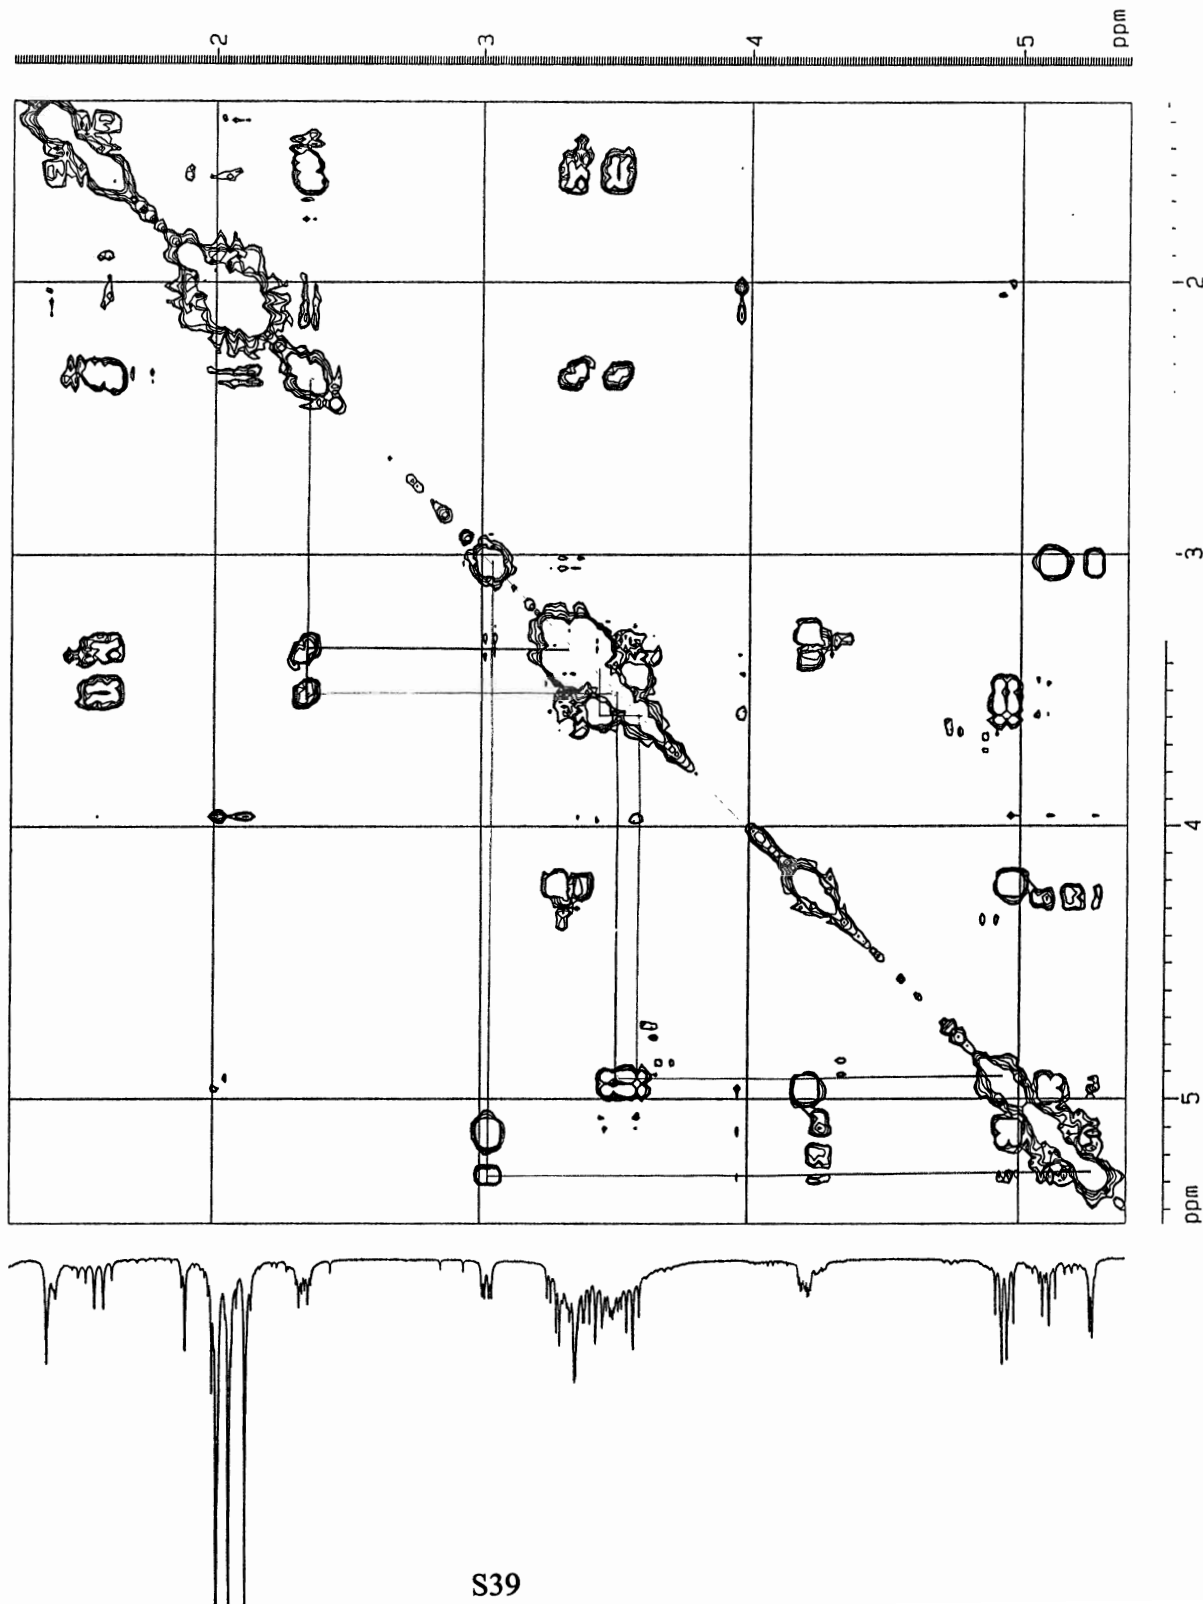

3',4',6,2'',5'',3'',4''-Hepta-O-acetyl-1-N-tert-butoxycarbonyl-3,2',6',2''',6''',2''',6'''-pentaazidoneomycin (21)

Standard Proton Experiment

Current Data Parameters  
 NAME 012906-1  
 EXPNO 1  
 PROCNO 1

F2 - Acquisition Parameters

Date\_ 500000  
 Time 9.16  
 INSTRUM arx400  
 PROBHD 5 mm Multinuc1  
 PULPROG zg  
 TO 32768  
 SOLVENT CDC13  
 NS 8  
 DS 0  
 SHH 7246.377 Hz  
 FIDRES 0.22142 Hz  
 AQ 2.2610421 sec  
 RG 512  
 DM 69.000 usec  
 DE 98.57 usec  
 TE 298.0 K  
 D1 1.00000000 sec  
 P1 4.00 usec  
 DE 98.57 usec  
 SFO1 400.1328371 MHz  
 NUCLEUS 1H

F2 - Processing parameters  
 SI 16384  
 SF 400.1300049 MHz  
 MDW EM  
 SSB 0  
 LB 0.10 Hz  
 GB 0  
 PC 1.00

1D NMR plot parameters  
 CX 20.00 cm  
 F1P 8.603 ppm  
 F1 3442.43 Hz  
 F2P -0.420 ppm  
 F2 -167.95 Hz  
 PPMCH 0.45115 ppm/cm  
 HZCM 180.51930 Hz/cm

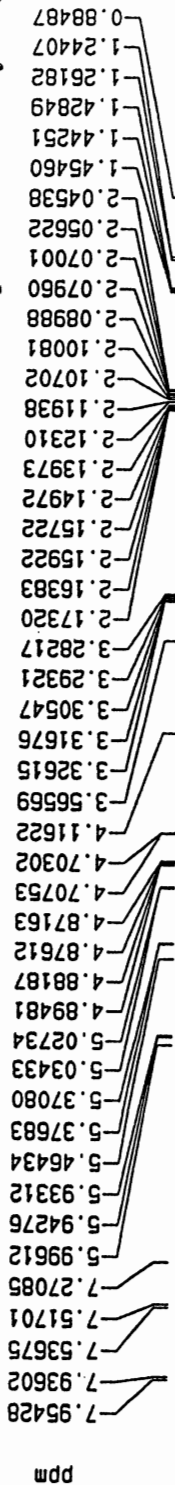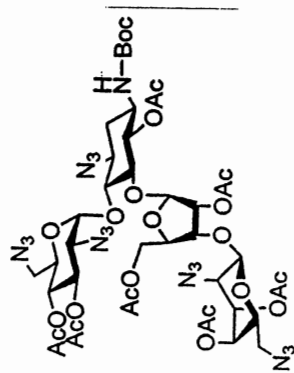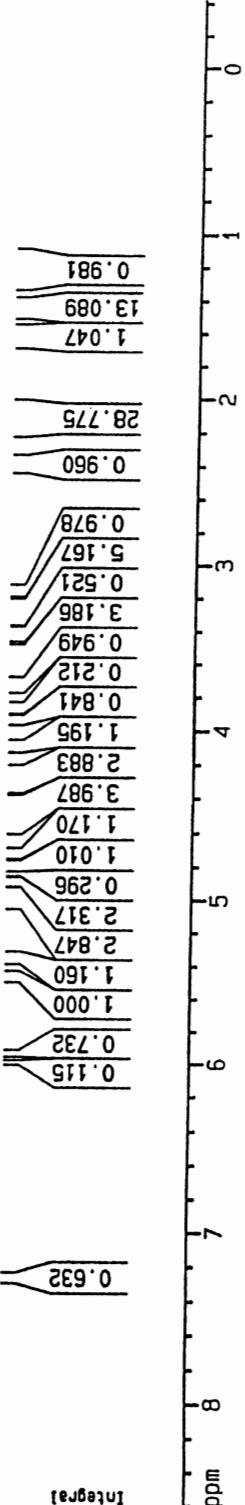



# Standard <sup>13</sup>C Experiment

## 3',4',6,2'',5'',3''',4''',-Hepta-O-acetyl-1-N-tert-butoxycarbonyl-3,2',6',2''',6''',-pentaazidoneomycin (21)

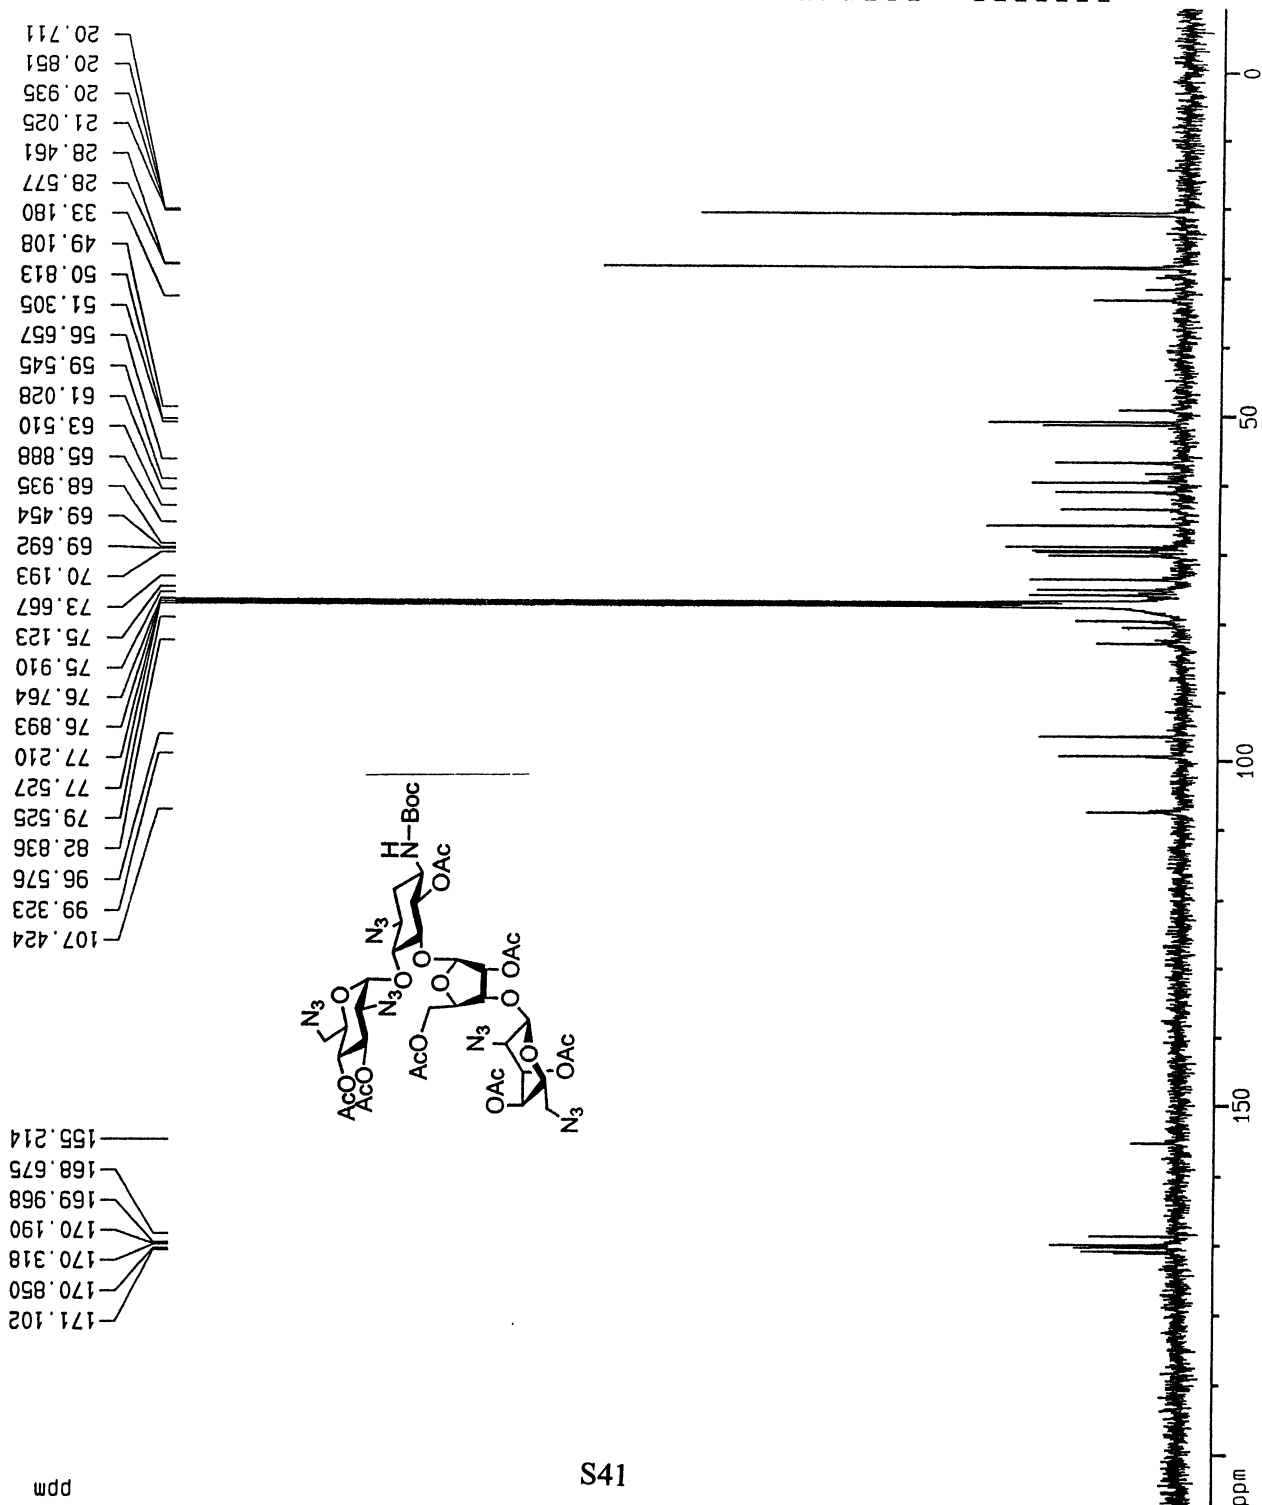

Current Data Parameters  
 NAME 062206-2  
 EXPNO 1  
 PROCNO 1

### F2 - Acquisition Parameters

Date\_ 500000  
 Time 21.07  
 INSTRUM arx400  
 PROBHD 5 mm Multinucl  
 PULPROG zgpg30  
 TD 32768  
 SOLVENT CDCl<sub>3</sub>  
 NS 14708  
 DS 2  
 SWH 25000.000 Hz  
 FIDRES 0.762939 Hz  
 AQ 0.6554100 sec  
 RG 45500  
 DW 20.000 usec  
 DE 27.14 usec  
 TE 300.0 K  
 D12 0.0002000 sec  
 DL5 20.00 dB  
 CPOPRG waltz16  
 P31 100.00 usec  
 D1 0.40000001 sec  
 P1 6.75 usec  
 DE 27.14 usec  
 SF01 100.6231179 MHz  
 NUCLEUS <sup>13</sup>C  
 D11 0.03000000 sec

F2 - Processing parameters  
 SI 16384  
 SF 100.6127490 MHz  
 MDW EM  
 SSB 0  
 LB 2.00 Hz  
 GB 0  
 PC 1.40

1D NMR plot parameters  
 CX 20.00 cm  
 F1P 207.395 ppm  
 F1 20866.54 Hz  
 F2P -9.474 ppm  
 F2 -953.25 Hz  
 PPMCM 10.84345 ppm/cm  
 HZCM 1090.98926 Hz/cm

3',4',6,2'',5'',3''',4''',4''',-Hepta-O-acetyl-1-N-tert-butoxycarbonyl-3,2',6'',2''',6''',6''',-pentaazidoneomycin (21)

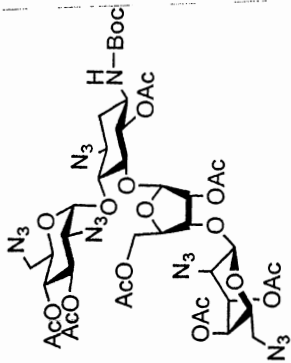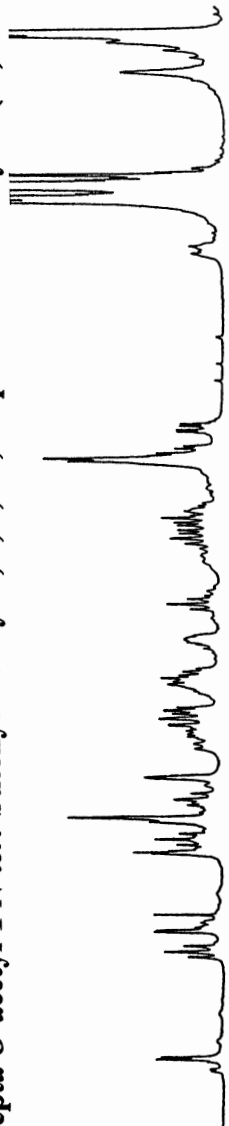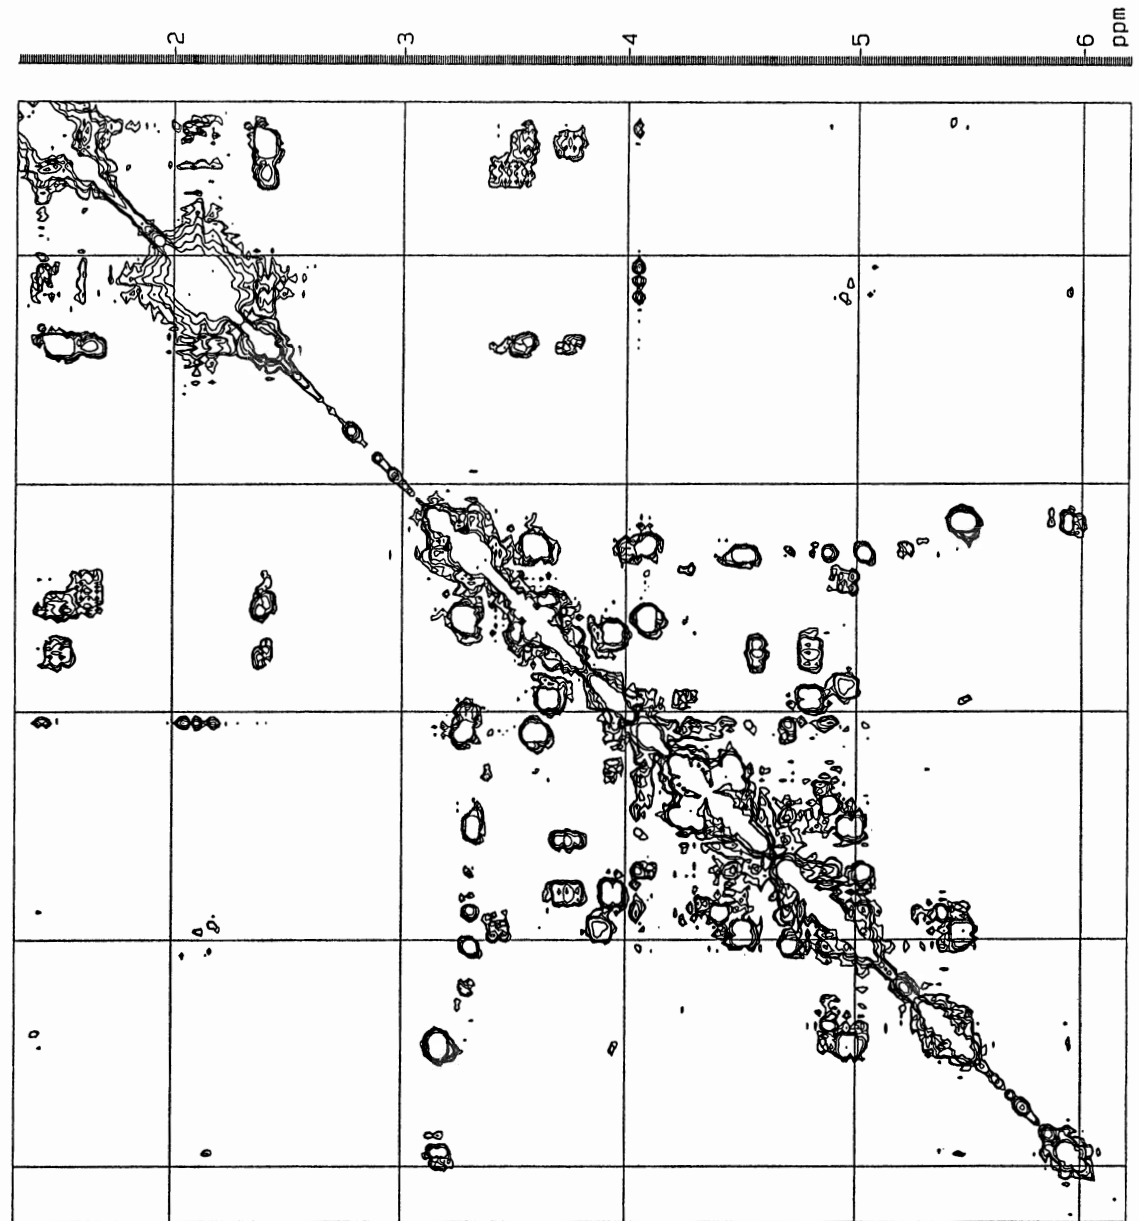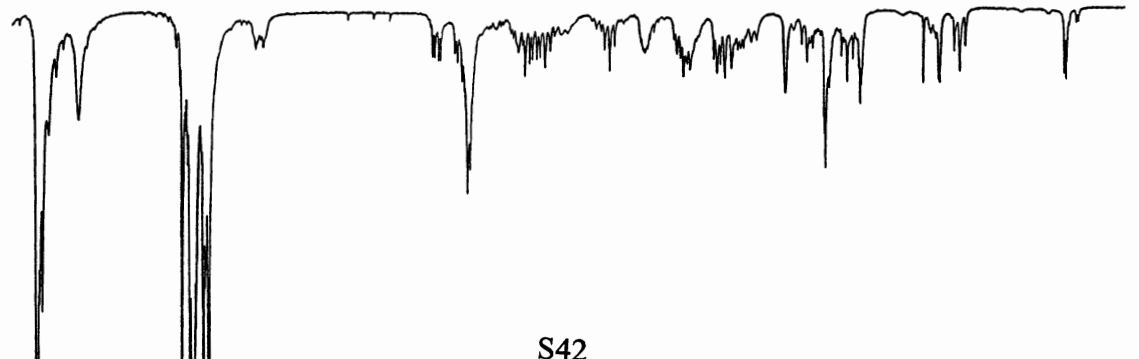

3',4',6,2'',5''',3''',4''',4''',-Hepta-O-acetyl-1-N-[(S)-4-(benzyloxycarbonylamino)-2-hydroxybutanoyl]-3,2',6',2''',6''',2''',6''',-pentaazidoneomycin (23)

Standard Proton Experiment

Current Data Parameters  
 NAME 022406-1  
 EXPNO 1  
 PROCNO 1

F2 - Acquisition Parameters

Date\_ 500000  
 Time 16.52  
 INSTRUM arx400  
 PROBHD 5 mm Multinuc1  
 PULPROG zg  
 TD 32768  
 SOLVENT CDC13  
 NS 8  
 DS 0  
 SWH 7246.377 Hz  
 FIDRES 0.221142 Hz  
 AQ 2.2610421 sec  
 RG 360  
 DM 69.000 usec  
 DE 98.57 usec  
 TE 298.0 K  
 D1 1.00000000 sec  
 P1 4.00 usec  
 DE 98.57 usec  
 SFO1 400.1326371 MHz  
 NUCLEUS 1H

F2 - Processing parameters

SI 16384  
 SF 400.1300049 MHz  
 MDM EM  
 SSB 0  
 LB 0.10 Hz  
 GB 0  
 PC 1.00

1D NMR plot parameters

CX 20.00 cm  
 F1P 6.817 ppm  
 F1 3527.78 Hz  
 F2P -0.420 ppm  
 F2 -167.95 Hz  
 PPMCM 0.46182 ppm/cm  
 HZCM 184.78688 Hz/cm

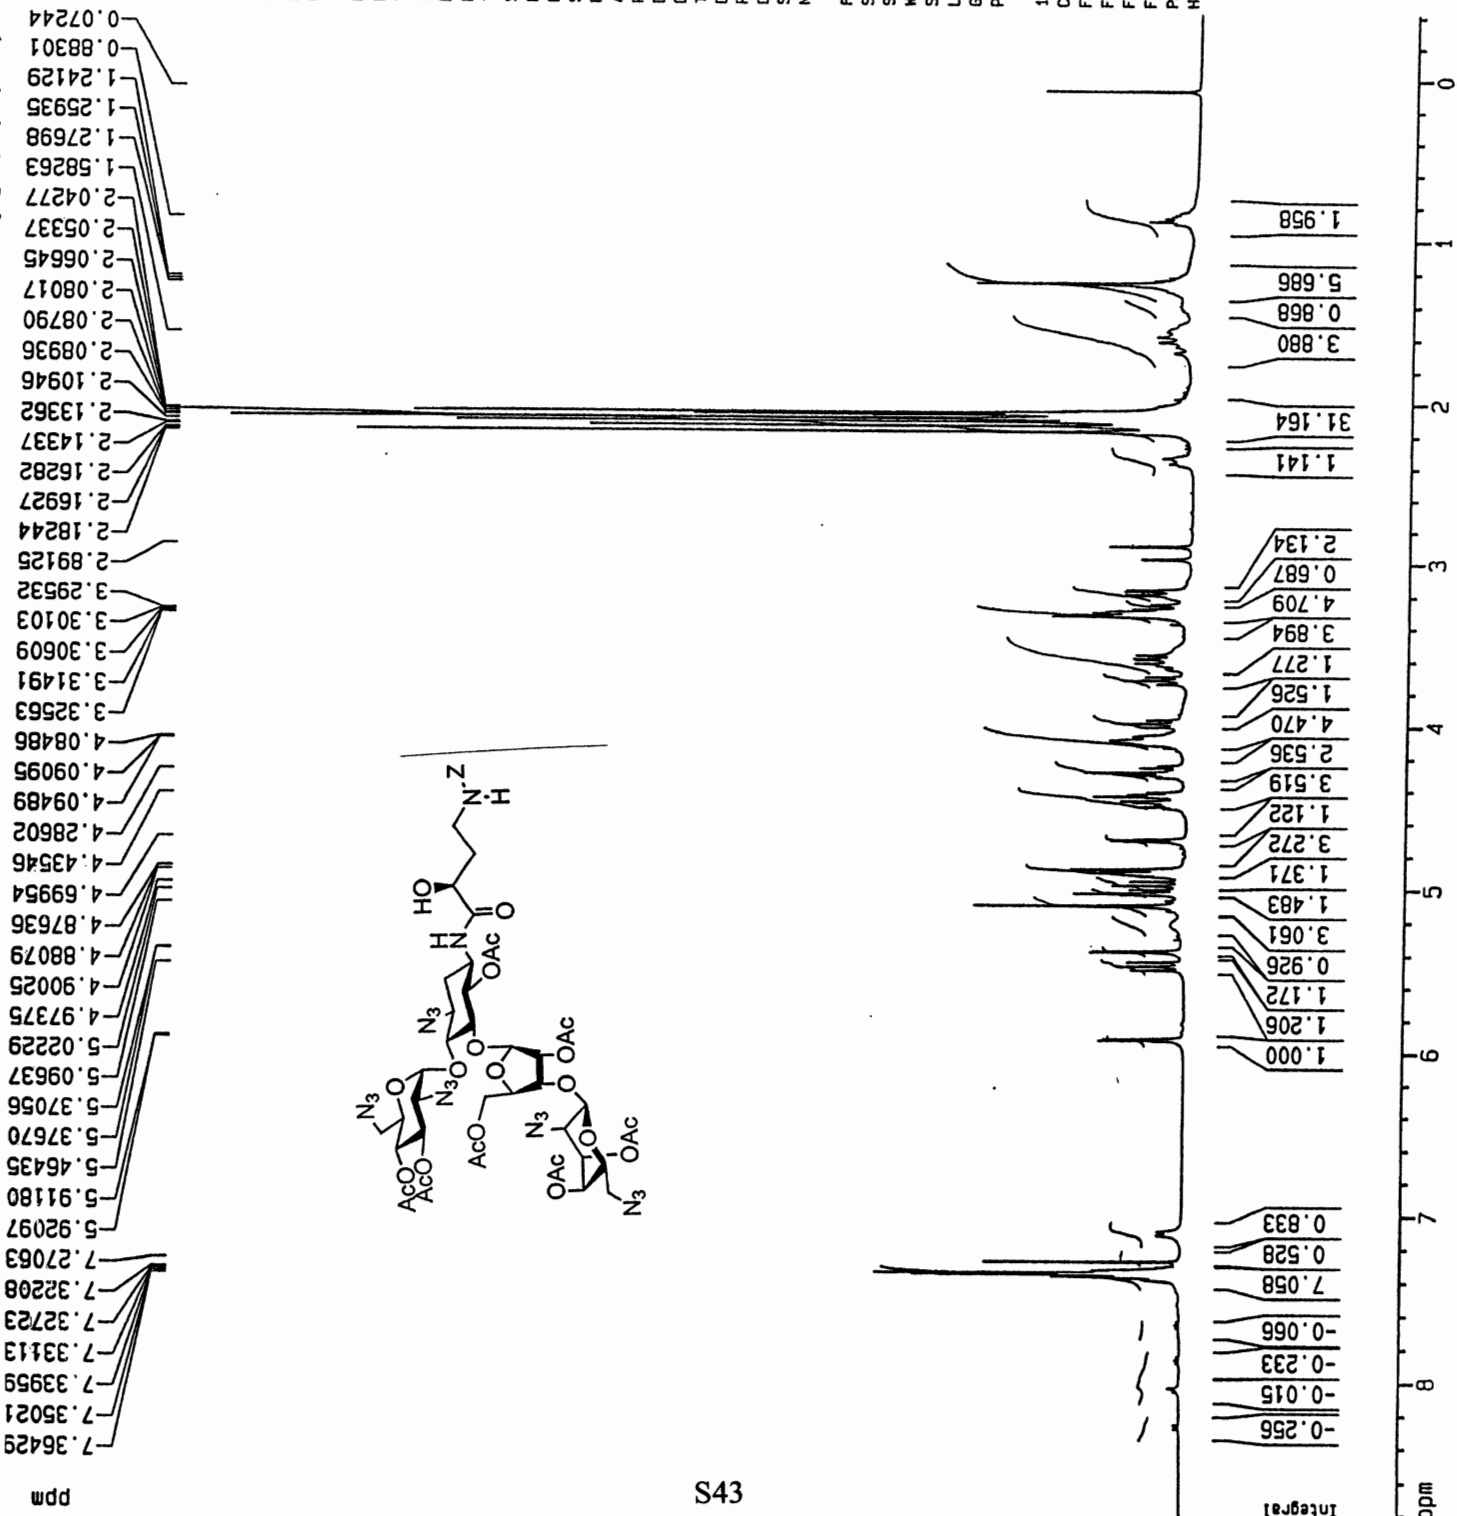



3',4',6,2'',5'',3''',4''''-Hepta-O-acetyl-1-N-[(S)-4-(benzyloxycarbonylamino)-2-hydroxybutanoyl]-3,2',6'',2''',6''''-pentaazidoneomycin (23)

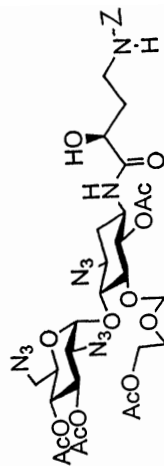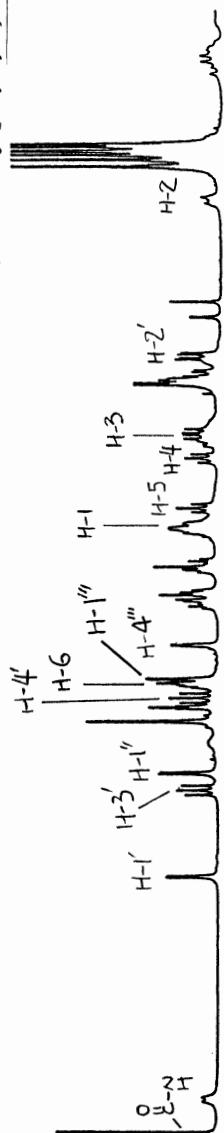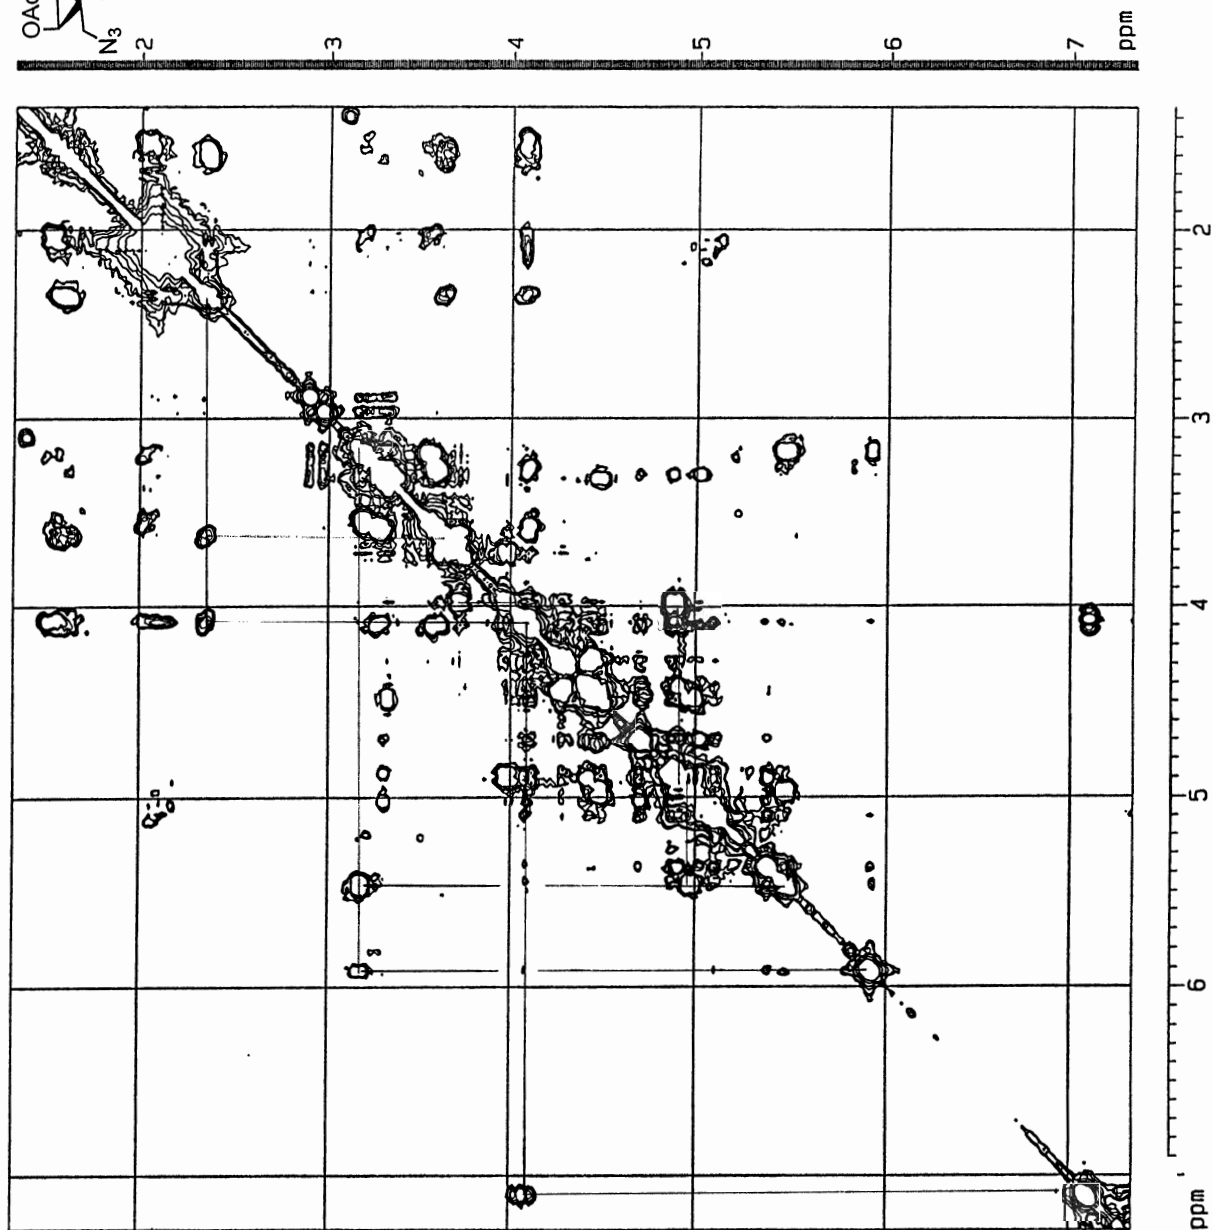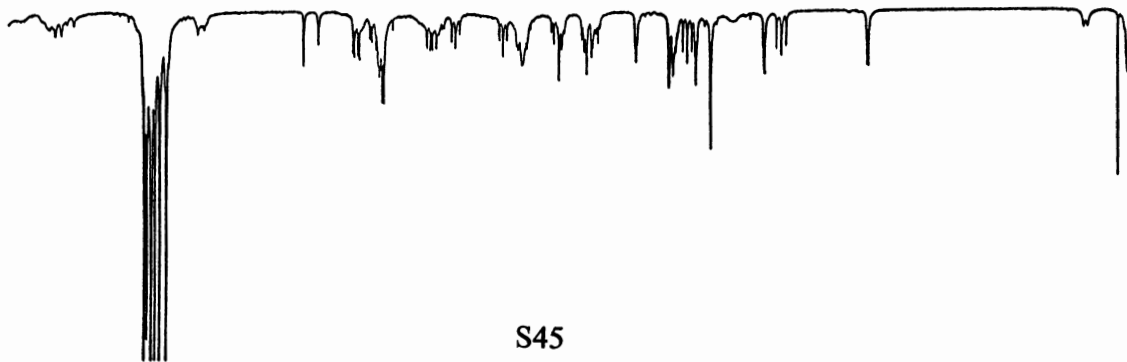

1-N-[(S)-4-amino-2-hydroxybutanoyl]neomycin (neokacin)

Standard Proton Experiment

Current Data Parameters  
 NAME 022006-1  
 EXPNO 1  
 PROCNO 1

F2 - Acquisition Parameters

Date\_ 500000  
 Time 17.04  
 INSTRUM ary400  
 PROBHD 5 mm Multinuc1  
 PULPROG zg  
 TD 32768  
 SOLVENT D2O  
 NS 8  
 DS 0  
 SMH 7246.377 Hz  
 FIDRES 0.221142 Hz  
 AQ 2.2610421 sec  
 RG 512  
 DW 69.000 usec  
 DE 98.57 usec  
 TE 298.0 K  
 D1 1.0000000 sec  
 P1 4.00 usec  
 DE 98.57 usec  
 SF01 400.1328371 MHz  
 NUCLEUS 1H

F2 - Processing parameters

SI 16384  
 SF 400.1300049 MHz  
 MDW EM  
 SSB 0  
 LB 0.10 Hz  
 GB 0  
 PC 1.00  
 1D NMR plot parameters  
 CX 20.00 cm  
 F1P 8.177 ppm  
 F1 3271.73 Hz  
 F2P -0.548 ppm  
 F2 -219.17 Hz  
 PPMCM 0.43622 ppm/cm  
 HZCM 174.54465 Hz/cm

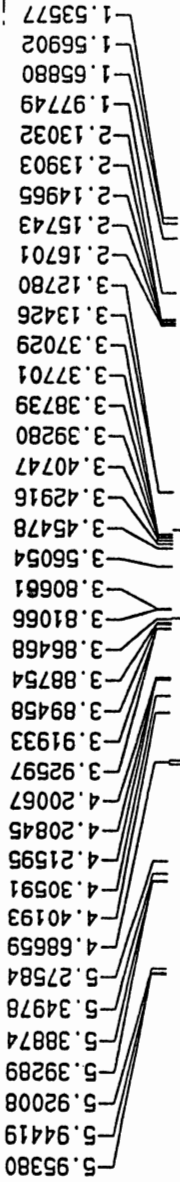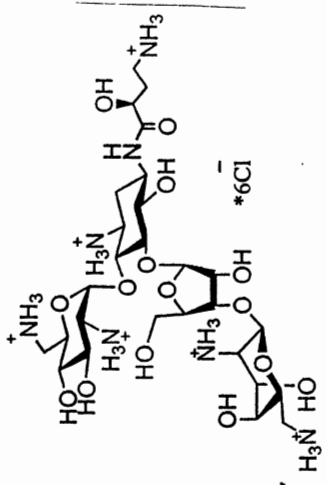

ppm

Integral

ppm

# Standard 13C Experiment

## 1-N-[(S)-4-amino-2-hydroxybutanoyl]neomycin (neokacin)

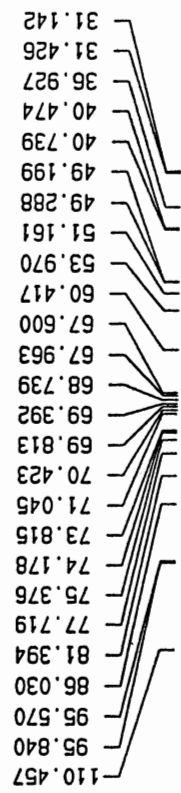

175.809

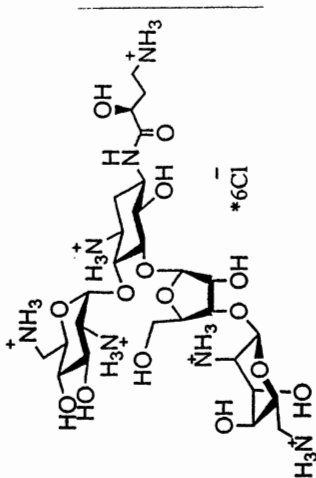

Current Data Parameters  
 NAME 022006-2  
 EXPNO 1  
 PROCNO 1

F2 - Acquisition Parameters  
 Date\_ 500000  
 Time 0.01  
 INSTRUM arx400  
 PROBHD 5 mm Multinucl  
 PULPROG zgpg30  
 TD 32768  
 SOLVENT D2O  
 NS 40000  
 DS 2  
 SWH 25000.000 Hz  
 FIDRES 0.762939 Hz  
 AQ 0.6554100 sec  
 RG 45500  
 DM 20.000 usec  
 DE 27.14 usec  
 TE 300.0 K  
 D12 0.0002000 sec  
 DLS 20.00 dB  
 CPDPRG waltz16  
 P31 100.00 usec  
 D1 0.4000001 sec  
 P1 6.75 usec  
 DE 27.14 usec  
 SF01 100.6231179 MHz  
 NUCLEUS 13C  
 D11 0.03000000 sec

F2 - Processing parameters  
 SI 16384  
 SF 100.6127450 MHz  
 WDW EM  
 SSB 0  
 LB 2.00 Hz  
 GB 0  
 PC 1.40

1D NMR plot parameters  
 CX 20.00 cm  
 F1P 227.296 ppm  
 F1 22868.89 Hz  
 F2P -21.181 ppm  
 F2 -2131.10 Hz  
 PPMCH 12.42367 ppm/cm  
 HZCM 1249.99968 Hz/cm

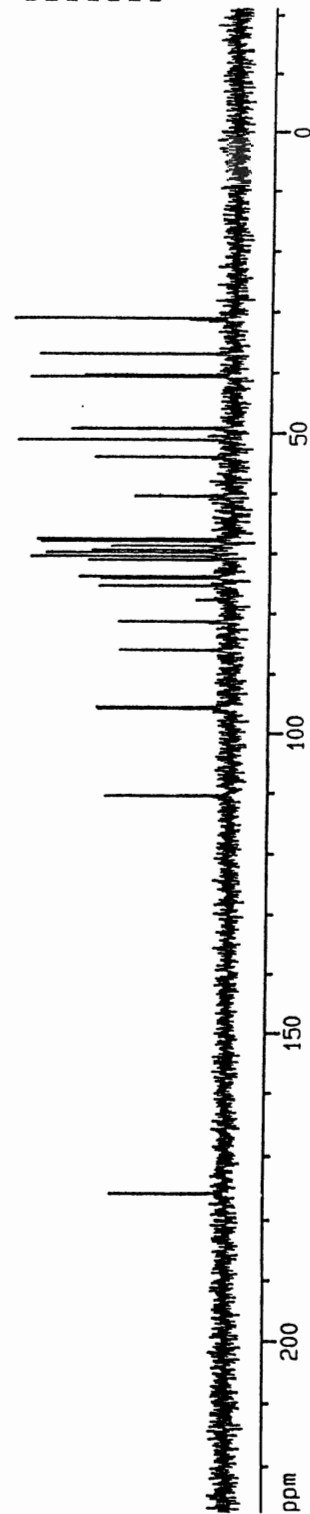

**5-O-(2,3,5-Tri-O-acetyl-β-D-ribofuranosyl)-6,3',4'-Tri-O-acetyl-1,3,2',6'-tetraazidoneamine (25)**

**Standard Proton Experiment**

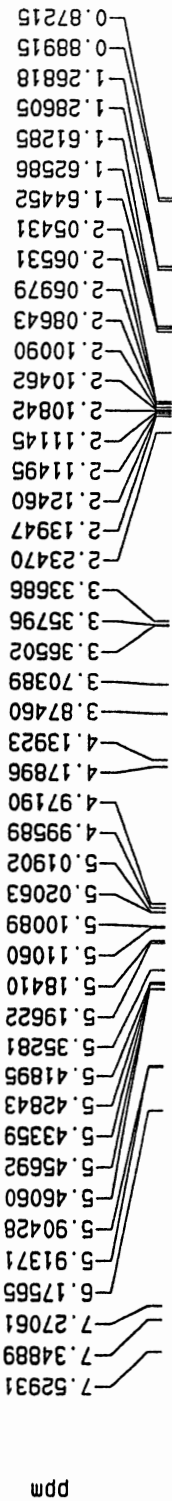

Current Data Parameters  
 NAME 071405-1  
 EXPNO 1  
 PROCNO 1

F2 - Acquisition Parameters  
 Date\_ 500000  
 Time 11.30  
 INSTRUM arx400  
 PROBHD 5 mm Multinucl  
 PULPROG zg  
 TD 32768  
 SOLVENT CDCl3  
 NS 8  
 DS 0  
 SMH 7246.377 Hz  
 FIDRES 0.221142 Hz  
 AQ 2.2610421 sec  
 RG 2048  
 DW 69.000 usec  
 DE 98.57 usec  
 TE 298.0 K  
 D1 1.00000000 sec  
 P1 4.00 usec  
 DE 98.57 usec  
 SF01 400.1328371 MHz  
 NUCLEUS 1H

F2 - Processing parameters  
 SI 16384  
 SF 400.1300049 MHz  
 MDW EM  
 SSB 0  
 LB 0.10 Hz  
 GB 0  
 PC 1.00

1D NMR plot parameters  
 CX 20.00 cm  
 F1P 8.403 ppm  
 F1 3362.30 Hz  
 F2P -0.314 ppm  
 F2 -125.61 Hz  
 PPMCH 0.43585 ppm/cm  
 HZCH 174.39565 Hz/cm

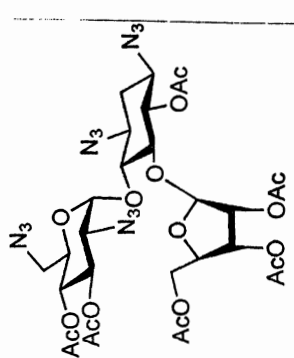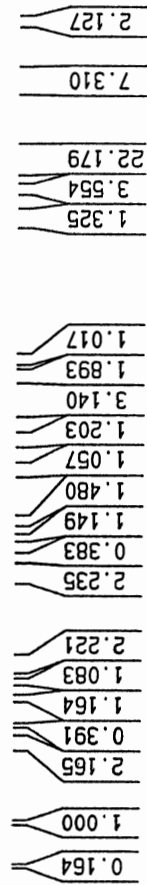



# Standard <sup>13</sup>C Experiment

## 5-O-(2,3,5-Tri-O-acetyl-β-D-ribofuranosyl)-6,3',4'-Tri-O-acetyl-1,3,2',6'-tetraazidoneamine (25)

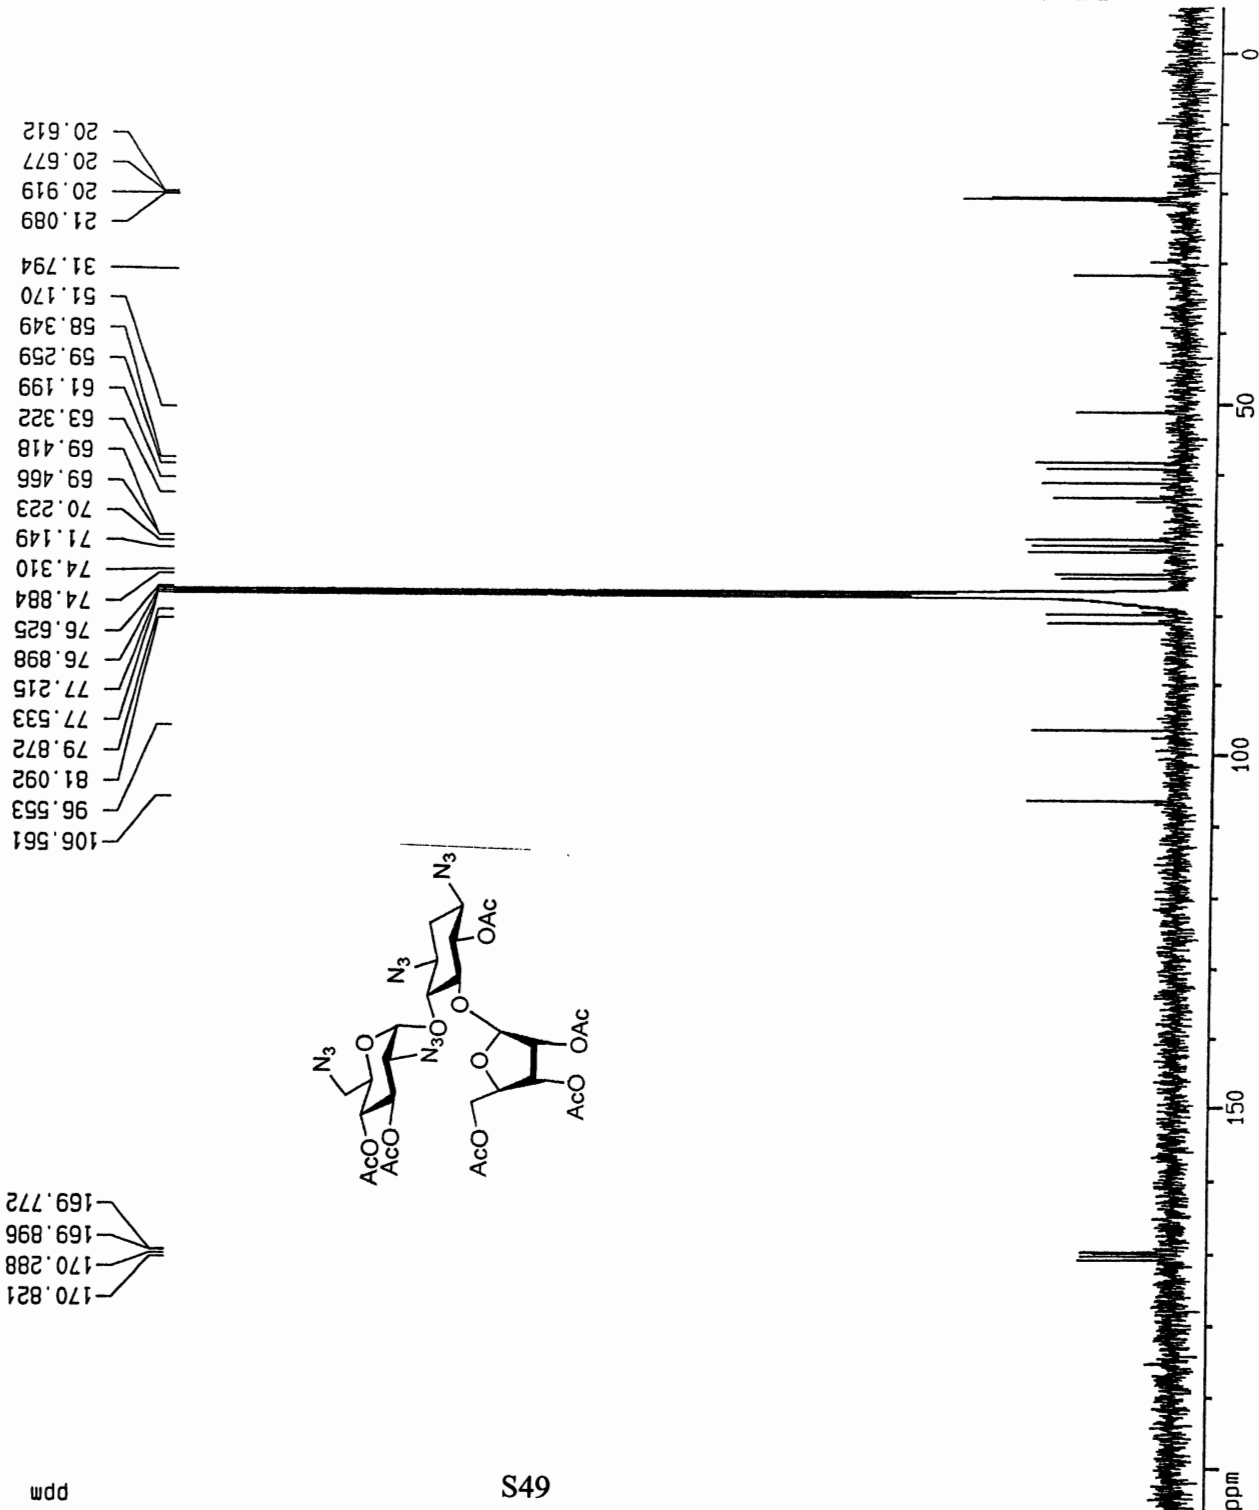

Current Data Parameters  
 NAME 071906-2  
 EXPNO 1  
 PROCNO 1

F2 - Acquisition Parameters  
 Date\_ 500000  
 Time 0.58  
 INSTRUM arx400  
 PROBHD 5 mm Multinucl  
 PULPROG zgpg30  
 TO 32768  
 SOLVENT CDC13  
 NS 30000  
 DS 2  
 SWH 25000.000 Hz  
 FIDRES 0.762939 Hz  
 AQ 0.6554100 sec  
 RG 45500  
 DM 20.000 usec  
 DE 27.14 usec  
 TE 300.0 K  
 D12 0.00002000 sec  
 DL5 20.00 dB  
 CPDPRG waltz16  
 P31 100.00 usec  
 D1 0.40000001 sec  
 P1 6.75 usec  
 DE 27.14 usec  
 SFO1 100.6231179 MHz  
 NUCLEUS <sup>13</sup>C  
 D11 0.03000000 sec

F2 - Processing parameters  
 SI 16384  
 SF 100.6127490 MHz  
 WDW EM  
 SSB 0  
 LB 2.00 Hz  
 GB 0  
 PC 1.40

1D NMR plot parameters  
 CX 20.00 cm  
 F1P 205.733 ppm  
 F1 20699.37 Hz  
 F2P -6.639 ppm  
 F2 -667.93 Hz  
 PPMCM 10.61859 ppm/cm  
 HZCM 1068.36536 Hz/cm

5-O-(2,3,5-Tri-O-acetyl- $\beta$ -D-ribofuranosyl)-6,3',4'-Tri-O-acetyl-1,3,2',6'-tetraazidoneamine (25)

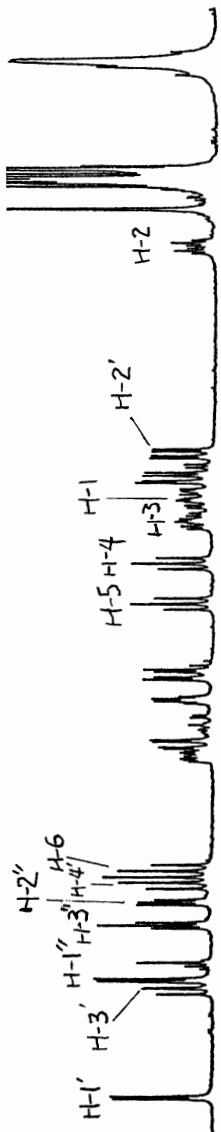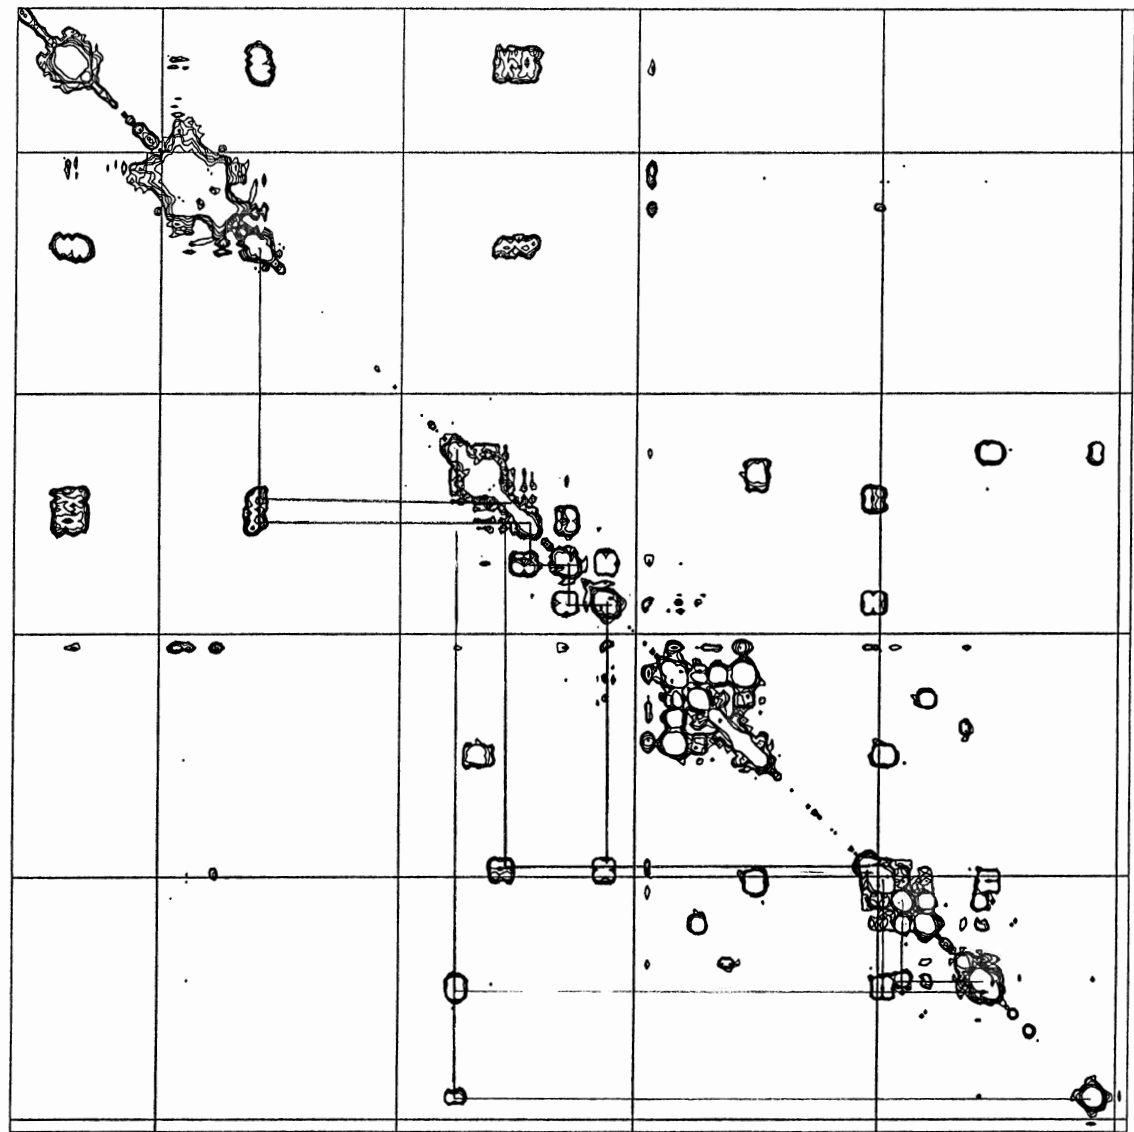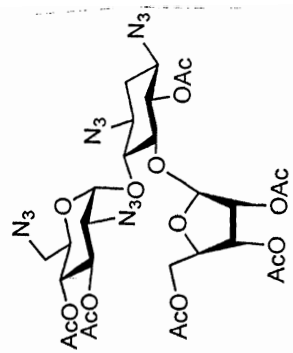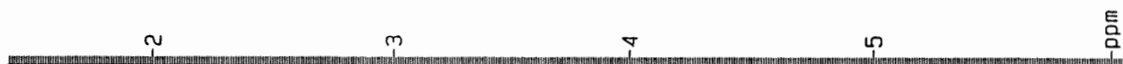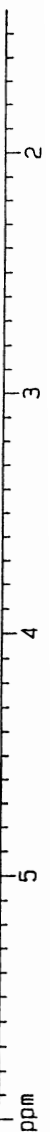

**5-O-(2,3,5-Tri-O-acetyl-D-ribofuranosyl)-1-N-tert-butoxycarbonyl-6,3',4'-Tri-O-acetyl-3,2',6'-triazidoneamine (26)**  
**Standard Bruker Experiment**

Current Data Parameters  
 NAME 071606-1  
 EXPNO 1  
 PROCNO 1

F2 - Acquisition Parameters  
 Date\_ 500000  
 Time 13.15  
 INSTRUM arx400  
 PROBHD 5 mm Multinucl  
 PULPROG zg  
 TO 32768  
 SOLVENT CDC13  
 DS 8  
 NS 0  
 SMH 7246.377 Hz  
 FIDRES 0.221142 Hz  
 AQ 2.2610421 sec  
 RG 256  
 DW 69.000 usec  
 DE 98.57 usec  
 TE 298.0 K  
 D1 1.0000000 sec  
 P1 4.00 usec  
 DE 98.57 usec  
 SF01 400.1328371 MHz  
 NUCLEUS 1H

F2 - Processing parameters  
 SI 16384  
 SF 400.1300049 MHz  
 MDM EM  
 SSB 0  
 LB 0.10 Hz  
 GB 0  
 PC 1.00

1D NMR plot parameters  
 CX 20.00 cm  
 F1P 8.330 ppm  
 F1 3333.05 Hz  
 F2P -0.625 ppm  
 F2 -249.92 Hz  
 PPMCM 0.44773 ppm/cm  
 HZCM 179.14857 Hz/cm

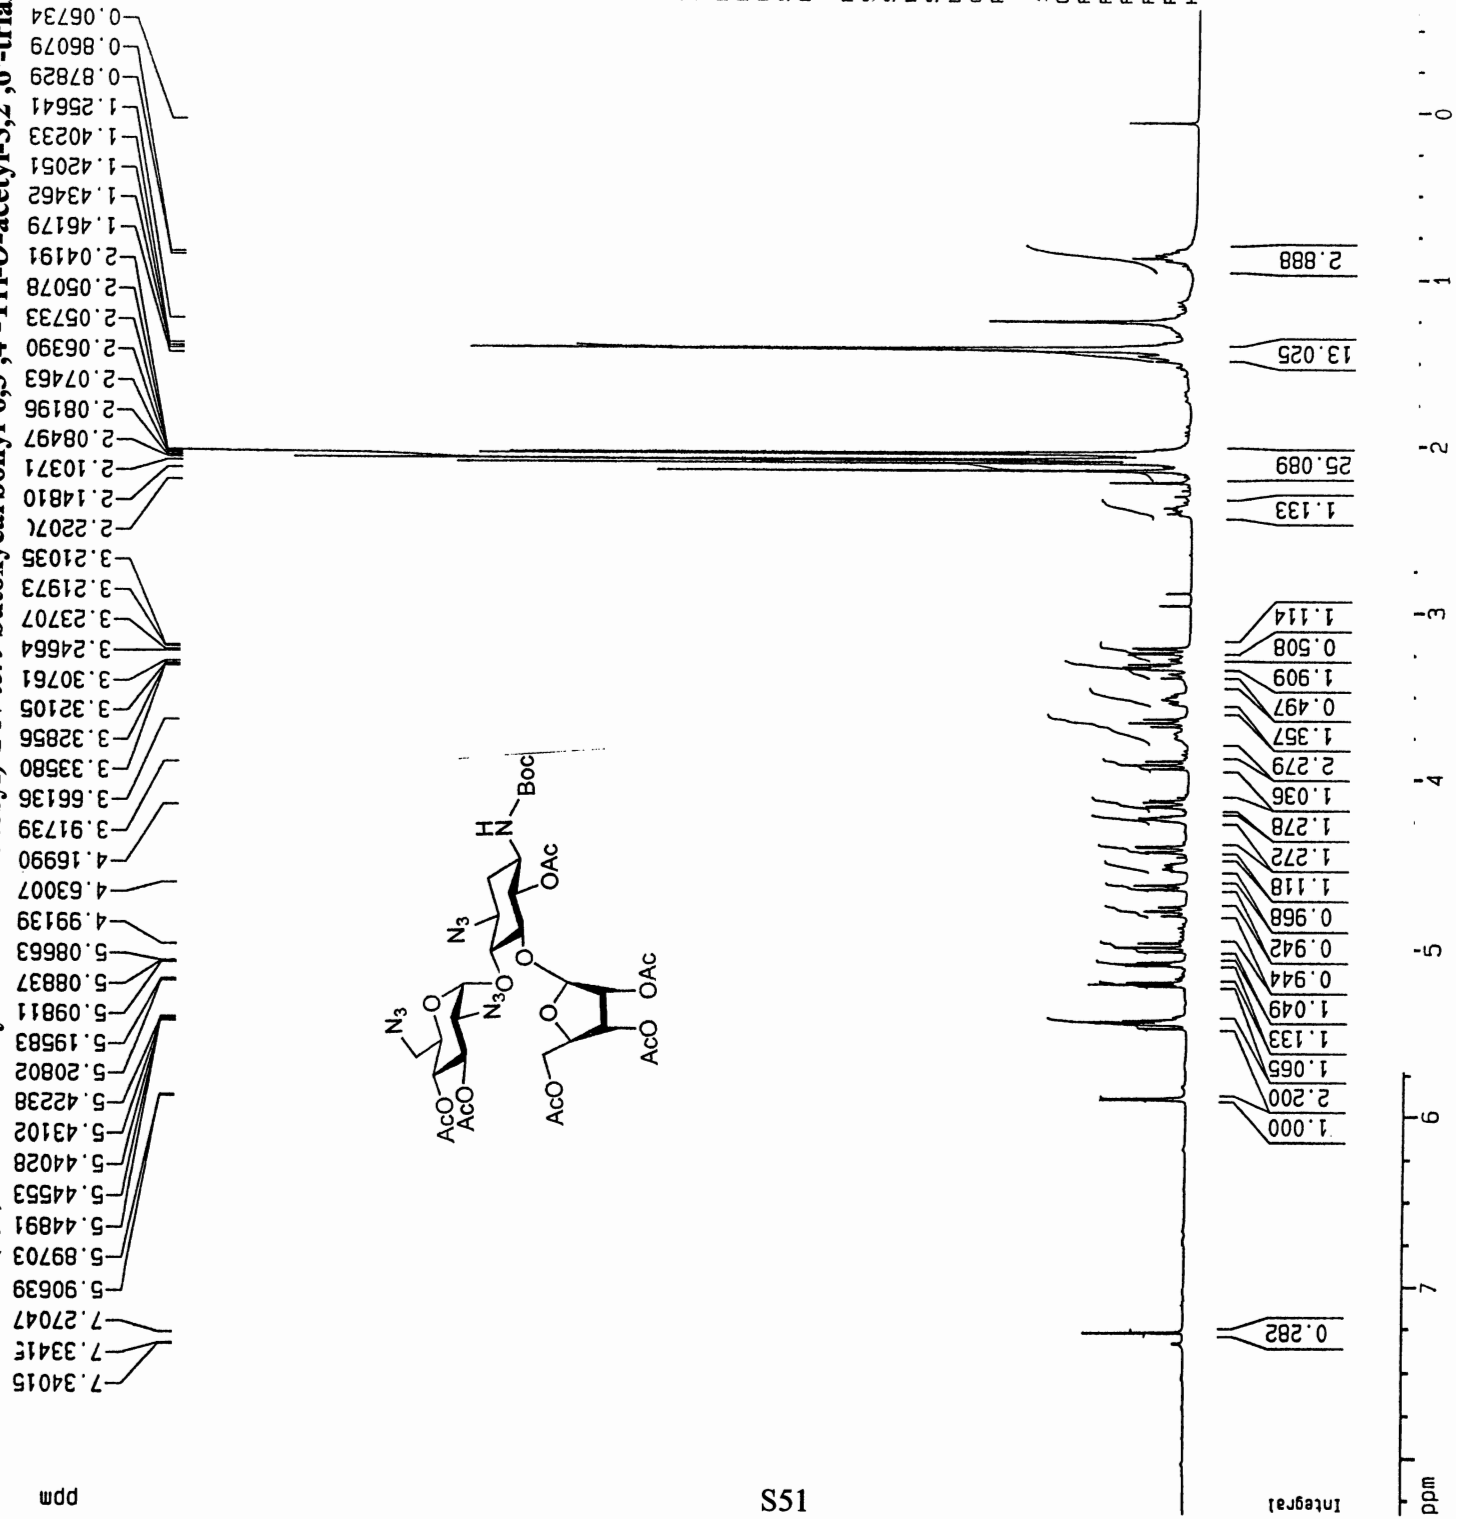

ppm

S51

Integral

ppm

Standard 13C  
Experiment

5-O-(2,3,5-Tri-O-acetyl-D-ribofuranosyl)-1-N-tert-butoxycarbonyl-6,3',4'-Tri-O-acetyl-3,2',6'-triazidoneamine (26)

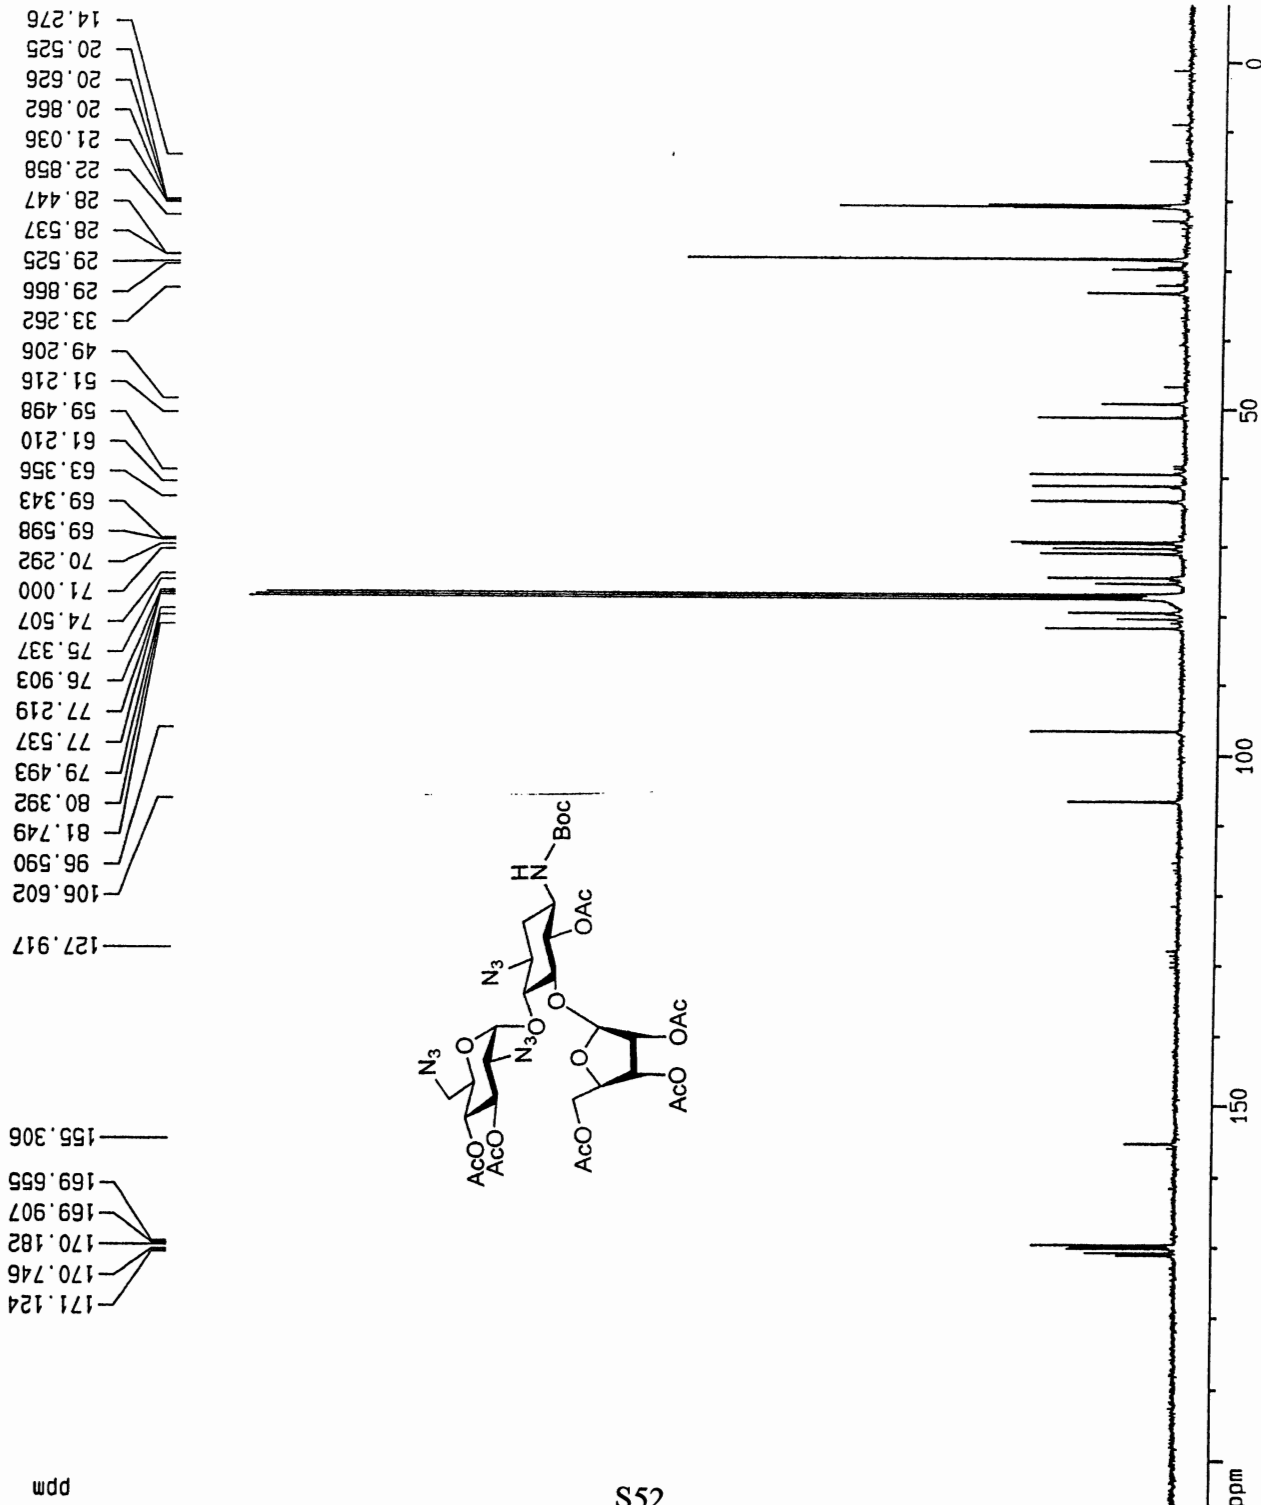

| Current Data Parameters |          |
|-------------------------|----------|
| NAME                    | 071606-2 |
| EXPNO                   | 1        |
| PROCNO                  | 1        |

  

| F2 - Acquisition Parameters |                 |
|-----------------------------|-----------------|
| Date_                       | 500000          |
| Time                        | 15.42           |
| INSTRUM                     | arx400          |
| PROBHD                      | 5 mm Multinucl  |
| PULPROG                     | zgdc30          |
| TD                          | 32768           |
| SOLVENT                     | CDCl3           |
| NS                          | 20000           |
| DS                          | 2               |
| SWH                         | 25000.000 Hz    |
| FIDRES                      | 0.762939 Hz     |
| AQ                          | 0.6554100 sec   |
| RG                          | 45500           |
| DM                          | 20.000 usec     |
| DE                          | 27.14 usec      |
| TE                          | 300.0 K         |
| D12                         | 0.00002000 sec  |
| DLS                         | 20.00 dB        |
| CPDPRG                      | waltz16         |
| P31                         | 100.00 usec     |
| D1                          | 0.40000001 sec  |
| P1                          | 6.75 usec       |
| DE                          | 27.14 usec      |
| SFO1                        | 100.6231179 MHz |
| NUCLEUS                     | 13C             |
| D11                         | 0.03000000 sec  |

  

| F2 - Processing parameters |                 |
|----------------------------|-----------------|
| SI                         | 16384           |
| SF                         | 100.6127490 MHz |
| WDW                        | EM              |
| SSB                        | 0               |
| LB                         | 2.00 Hz         |
| GB                         | 0               |
| PC                         | 1.40            |

  

| 1D NMR plot parameters |                  |
|------------------------|------------------|
| CX                     | 20.00 cm         |
| F1P                    | 206.485 ppm      |
| F1                     | 20775.05 Hz      |
| F2P                    | -8.394 ppm       |
| F2                     | -844.53 Hz       |
| PPMCM                  | 10.74396 ppm/cm  |
| HZCM                   | 1080.97888 Hz/cm |

5-O-(2,3,5-Tri-O-acetyl-D-ribofuranosyl)-1-N-tert-butoxycarbonyl-6,3',4'-Tri-O-acetyl-3,2',6'-triazidoneamine (26)

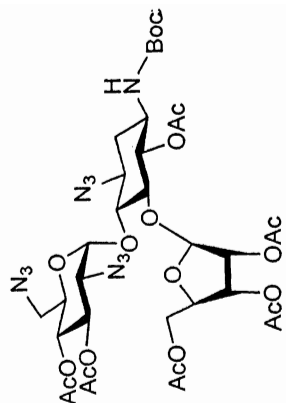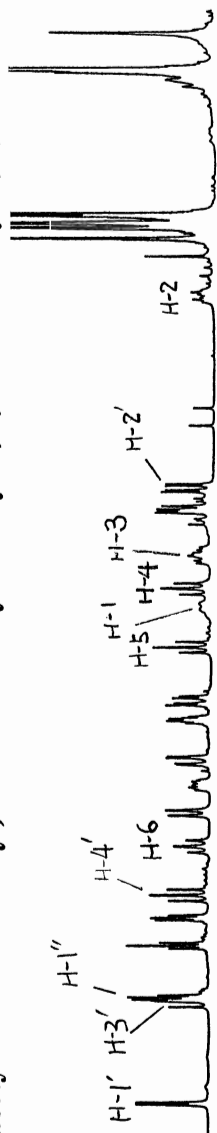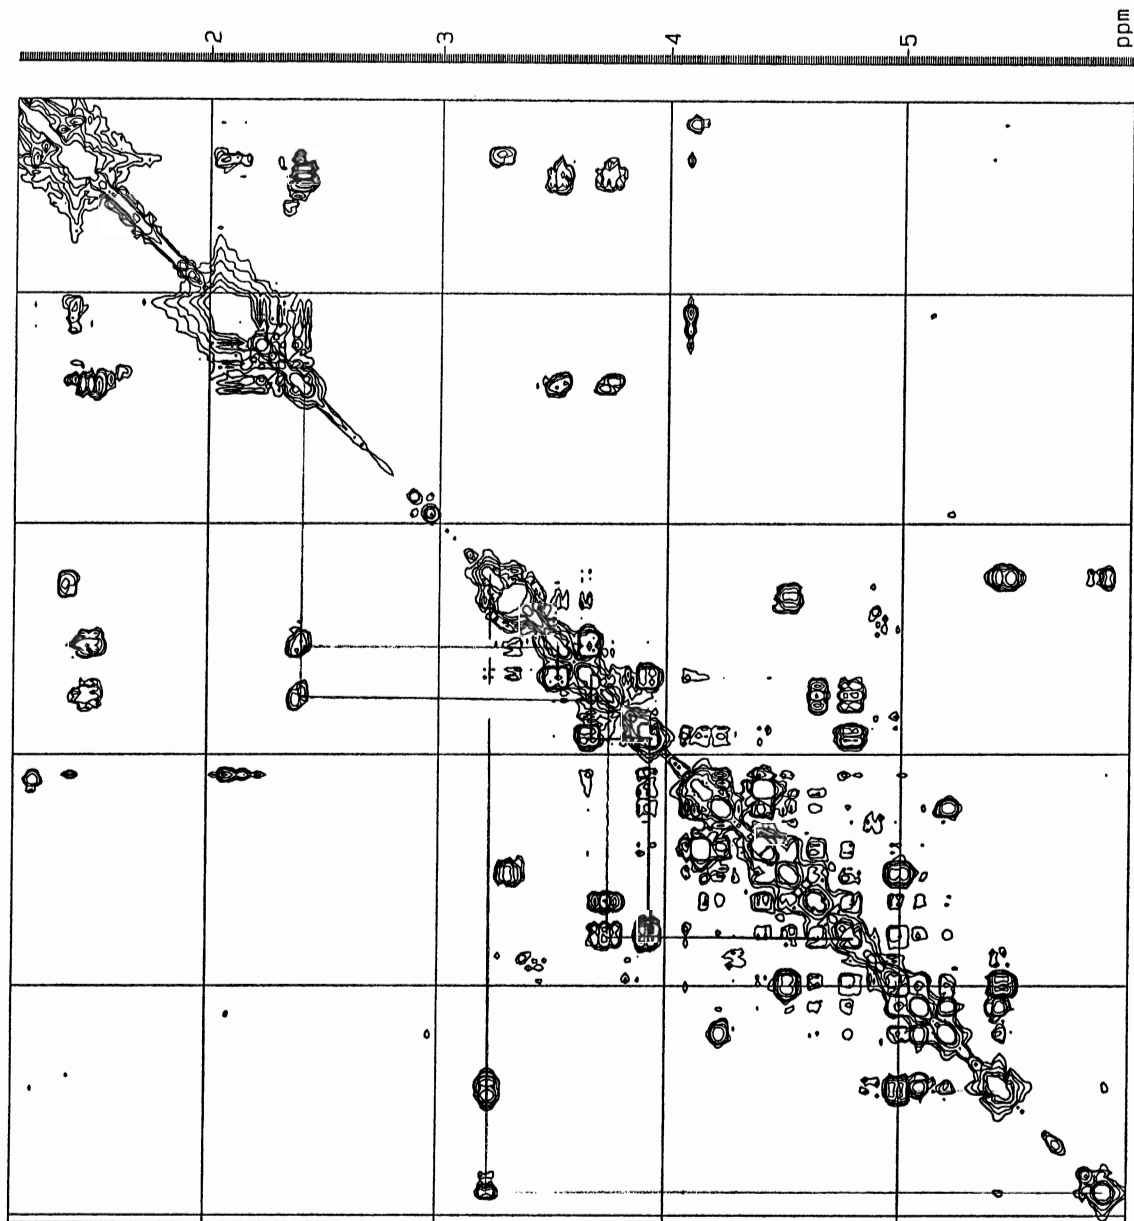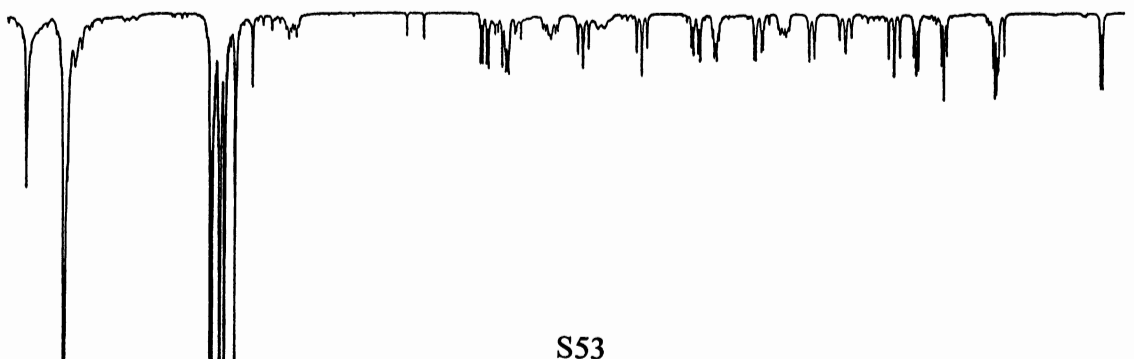

5-O-(2,3,5-Tri-O-acetyl-β-D-ribofuranosyl)-1-N-[(S)-4-(benzyloxycarbonylamino)-2-hydroxybutanoyl]-6,3',4'-Tri-O-acetyl-3,2',6'-triazidoneamine (27)

Standard Brucon Experiment

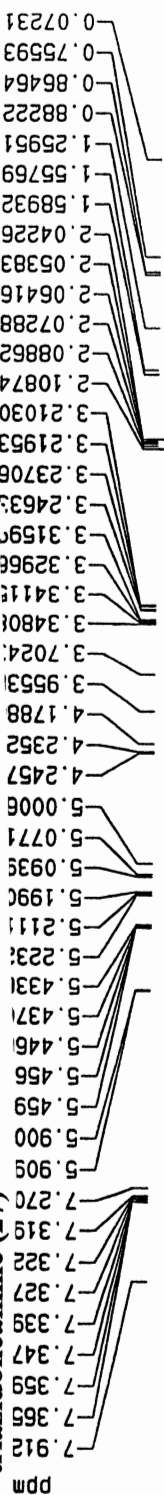

Current Data Parameters  
 NAME 080306-4  
 EXPNO 1  
 PROCNO 1

F2 - Acquisition Parameters  
 Date\_ 500000  
 Time 20.31  
 INSTRUM arx400  
 PROBHD 5 mm Multinuc1  
 PULPROG zg  
 TD 32768  
 SOLVENT CDC13  
 NS 8  
 DS 0

SMH 7246.377 Hz  
 FIDRES 0.221142 Hz  
 AQ 2.2610421 sec  
 RG 360  
 DW 69.000 usec  
 DE 98.57 usec  
 TE 298.0 K  
 D1 1.0000000 sec  
 P1 4.00 usec  
 DE 98.57 usec  
 SF01 400.1328371 MHz  
 NUCLEUS 1H

F2 - Processing parameters  
 SI 16384  
 SF 400.1300049 MHz  
 MDW EM  
 SSB 0  
 LB 0.10 Hz  
 GB 0  
 PC 1.00

1D NMR plot parameters  
 CX 20.00 cm  
 F1P 9.408 ppm  
 F1 3764.47 Hz  
 F2P -1.100 ppm  
 F2 -440.04 Hz  
 PPMCH 0.52539 ppm/cm  
 HZCM 210.22536 Hz/cm

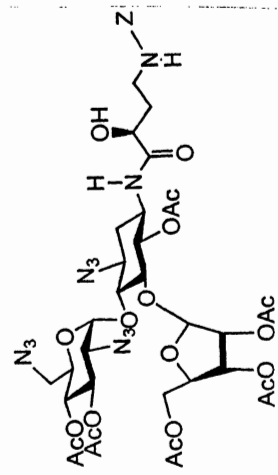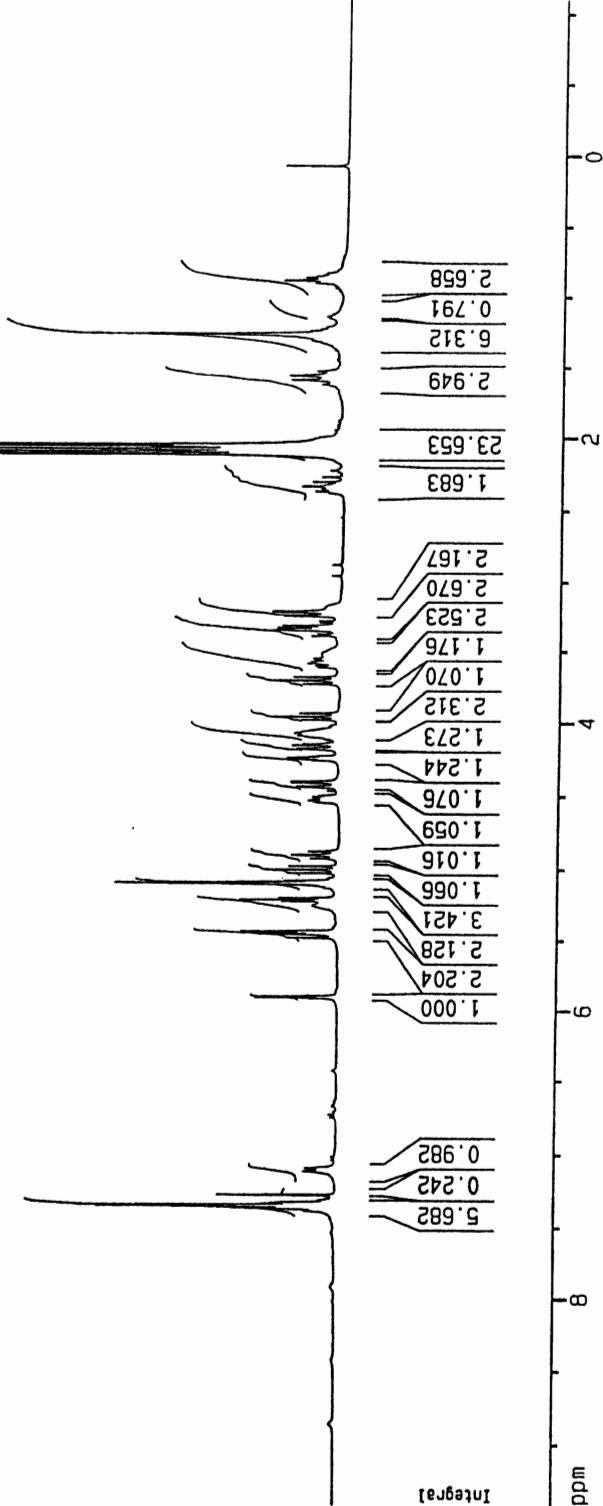

Standard 13C  
Experiment

5-O-(2,3,5-Tri-O-acetyl-β-D-ribofuranosyl)-1-N-(S)-4-(benzyloxycarbonylamino)-2-hydroxybutanoyl-6,3',4'-Tri-O-acetyl-3,2',6'-  
triazidoneamine (27)

| Current Data Parameters | EXPNO | PROCNO |
|-------------------------|-------|--------|
| NAME                    | 1     | 1      |
| 080306-5                |       |        |

| F2 - Acquisition Parameters |                 |
|-----------------------------|-----------------|
| Date_                       | 500000          |
| Time                        | 23.10           |
| INSTRUM                     | arx400          |
| PROBHD                      | 5 mm Multinucl  |
| PULPROG                     | zgpg30          |
| TD                          | 32768           |
| SOLVENT                     | CDC13           |
| NS                          | 30000           |
| DS                          | 2               |
| SWH                         | 25000.000 Hz    |
| FIDRES                      | 0.762939 Hz     |
| AQ                          | 0.6554100 sec   |
| RG                          | 45500           |
| DM                          | 20.000 usec     |
| DE                          | 27.14 usec      |
| TE                          | 300.0 K         |
| D12                         | 0.00002000 sec  |
| DLS                         | 20.00 dB        |
| CPDPRG                      | waltz16         |
| P31                         | 100.00 usec     |
| D1                          | 0.40000001 sec  |
| P1                          | 6.75 usec       |
| DE                          | 27.14 usec      |
| SF01                        | 100.6231179 MHz |
| NUCLEUS                     | 13C             |
| D11                         | 0.03000000 sec  |

| F2 - Processing parameters |                 |
|----------------------------|-----------------|
| SI                         | 16384           |
| SF                         | 100.6127490 MHz |
| WDW                        | EM              |
| SSB                        | 0               |
| LB                         | 2.00 Hz         |
| GB                         | 0               |
| PC                         | 1.40            |

| 1D NMR plot parameters |                  |
|------------------------|------------------|
| CX                     | 20.00 cm         |
| F1P                    | 209.243 ppm      |
| F1                     | 21052.55 Hz      |
| F2P                    | -10.901 ppm      |
| F2                     | -1096.80 Hz      |
| PPHOM                  | 11.00723 ppm/cm  |
| HZCM                   | 1107.46729 Hz/cm |

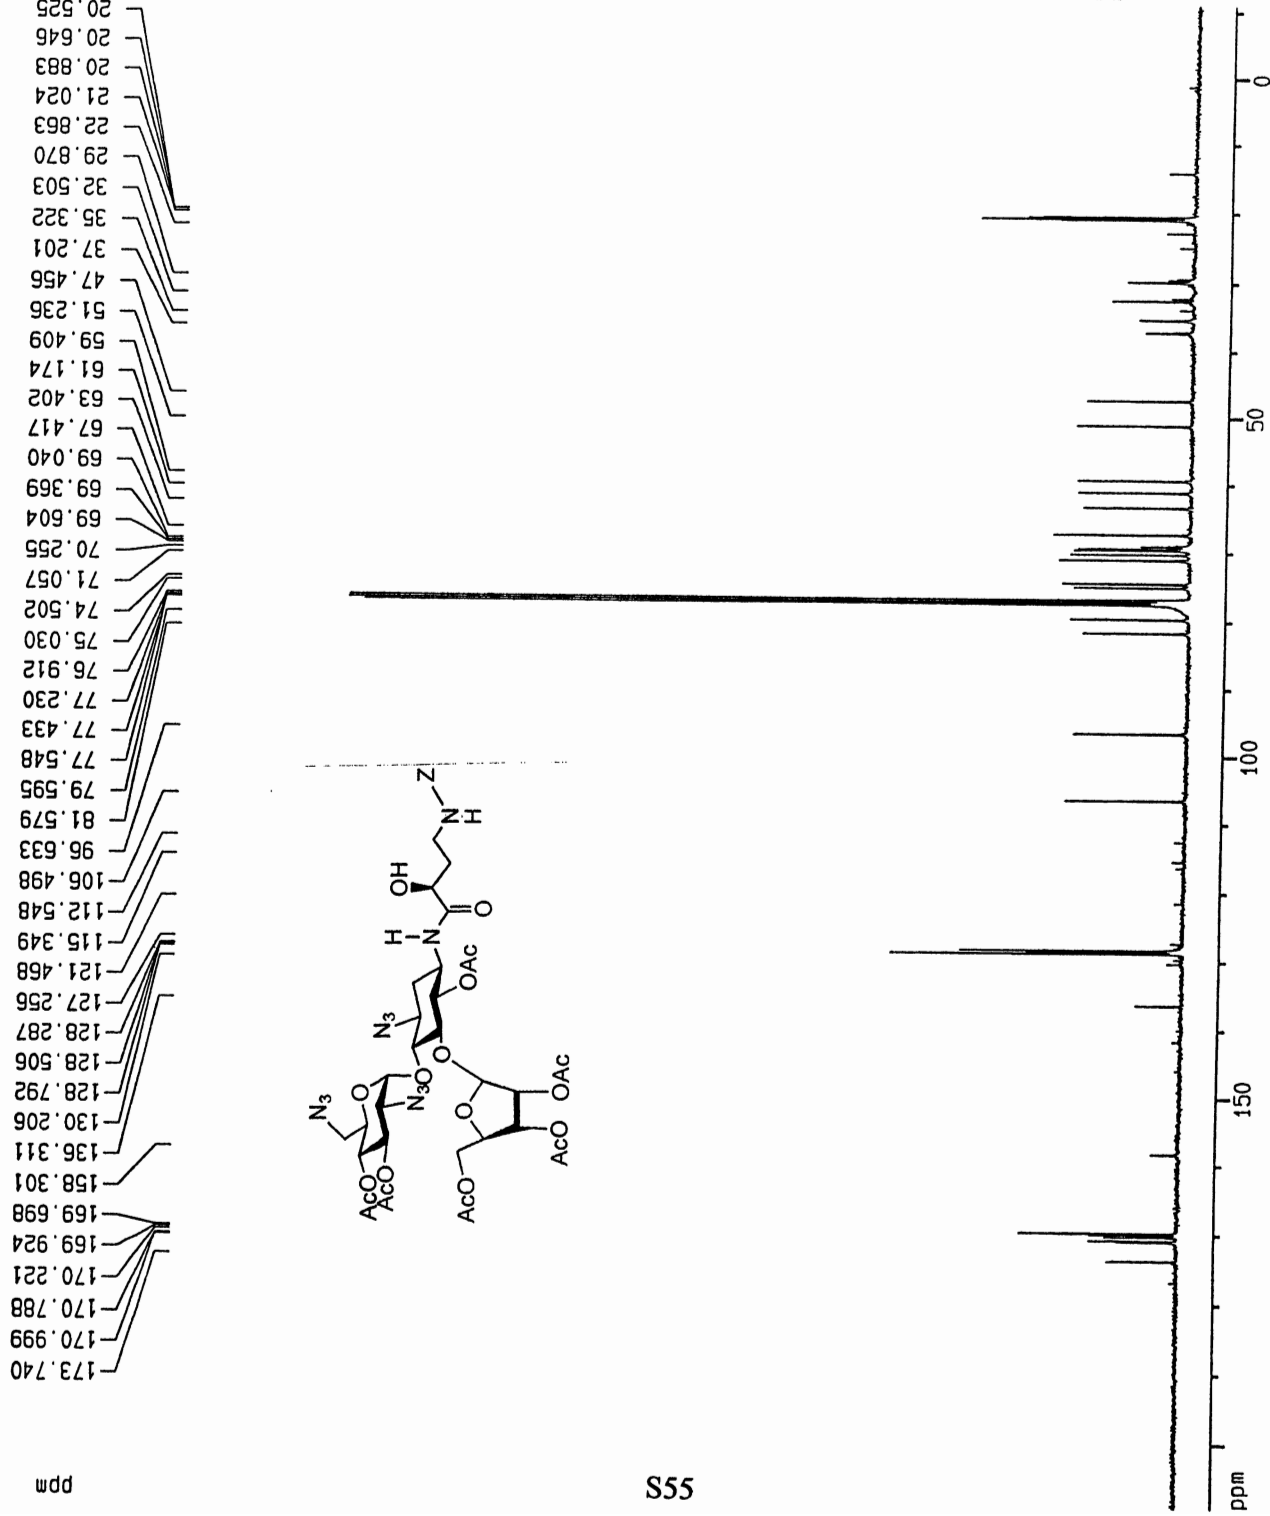

**5-O-(2,3,5-Tri-O-acetyl- $\beta$ -D-ribofuranosyl)-1-N-[(S)-4-(benzyloxycarbonylamino)-2-hydroxybutanoyl]-6,3',4'-Tri-O-acetyl-3,2',6'-triazidoneamine (27)**

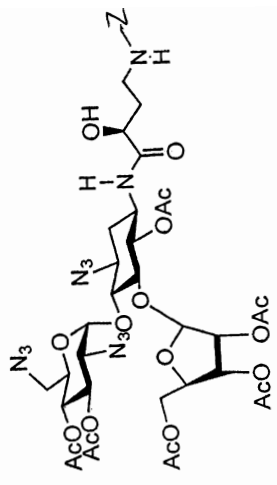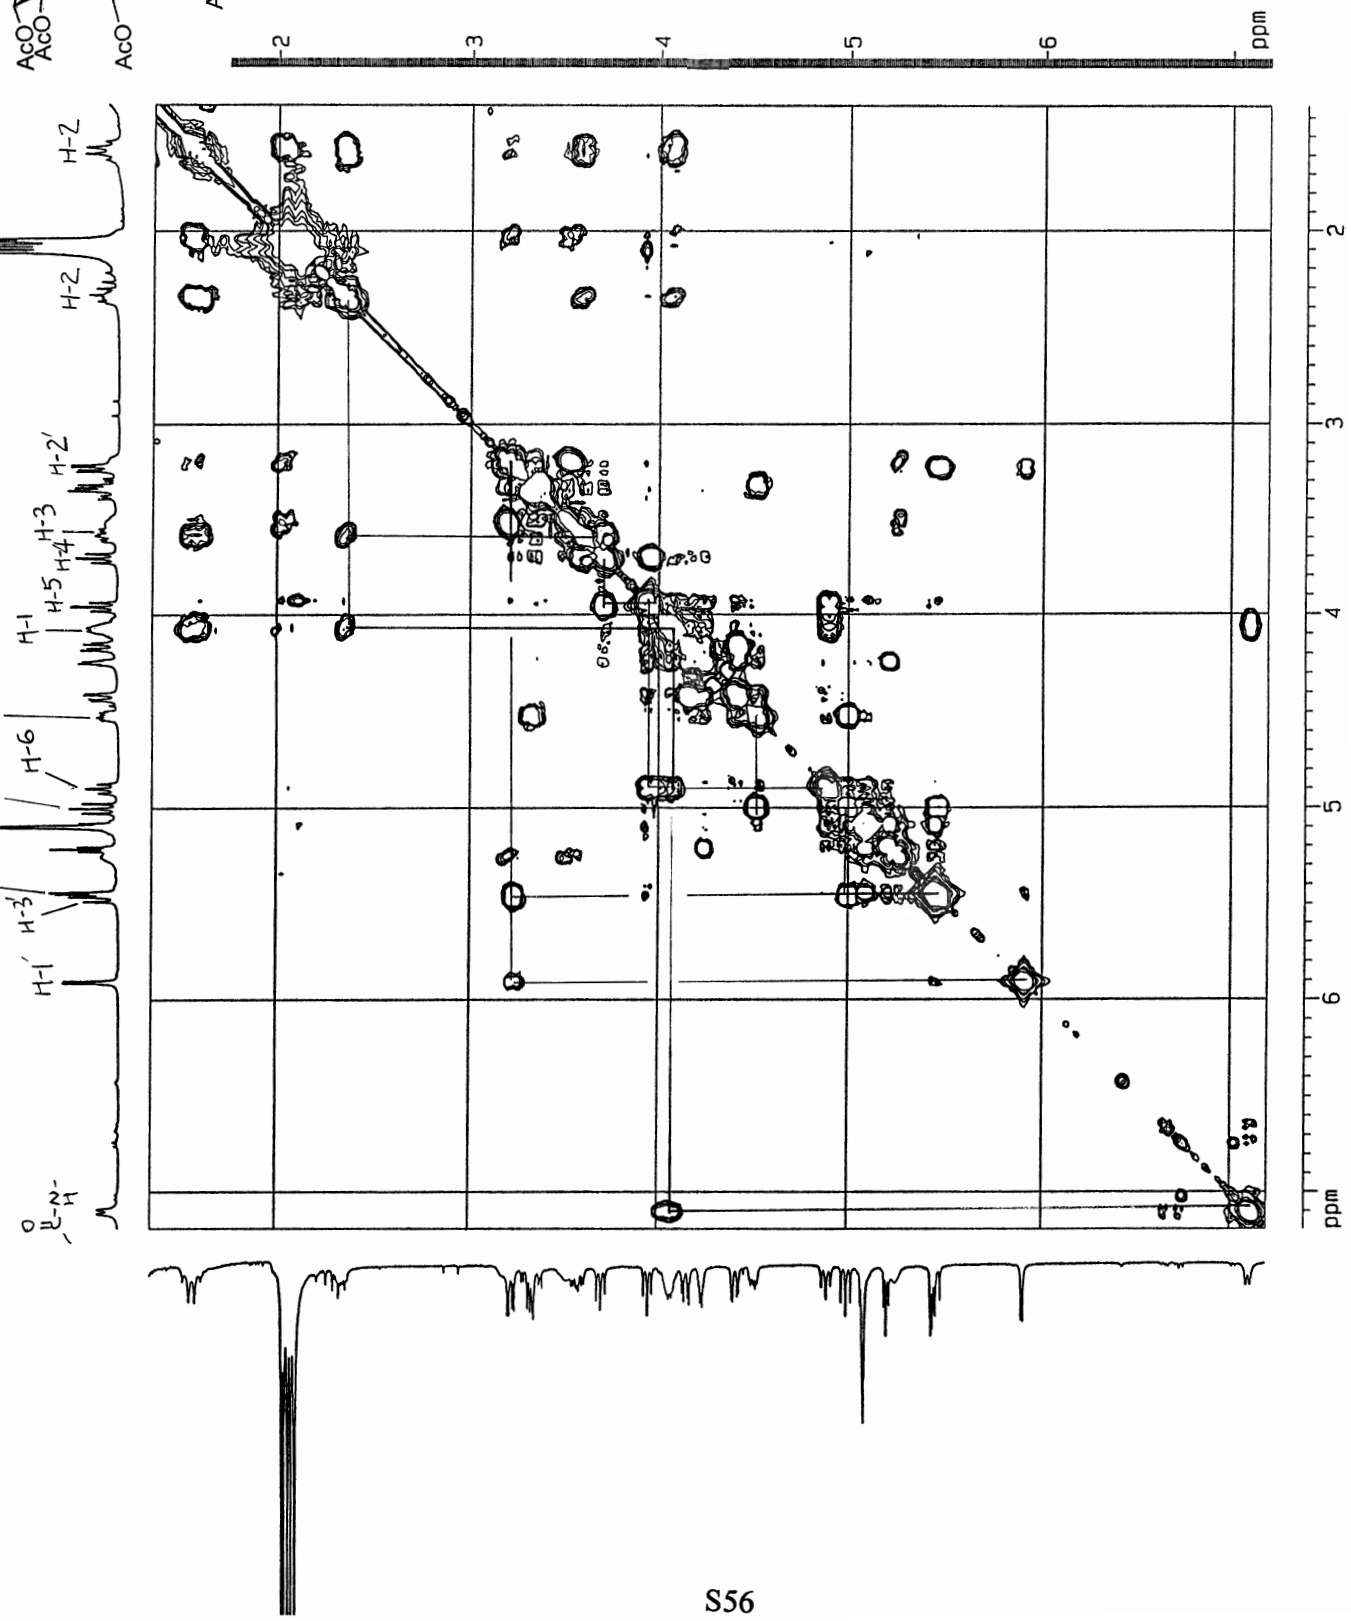



5-O-(β-D-ribofuranosyl)-1-N-[(S)-4-amino-2-hydroxybutanoyl]neamine (Butirosin B)

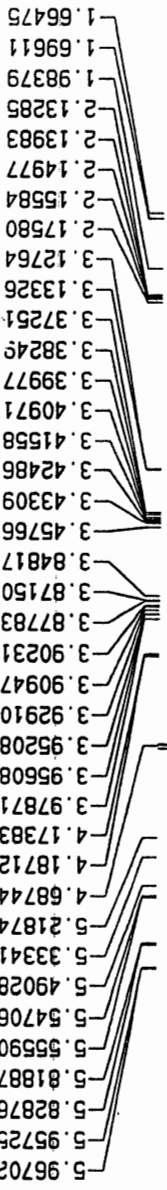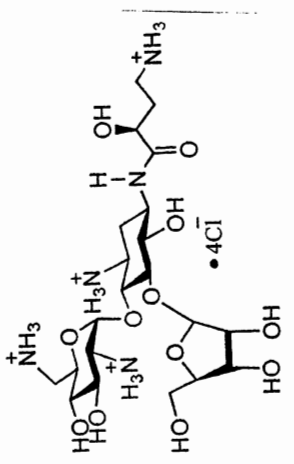

Standard Protocol Experiment

Current Data Parameters  
 NAME 122005-1  
 EXPNO 1  
 PROCNO 1

F2 - Acquisition Parameters  
 Date\_ 500000  
 Time 19.32  
 INSTRUM arx400  
 PROBHD 5 mm Multinuc1  
 PULPROG zg9  
 TD 32768  
 SOLVENT D2O  
 NS 8  
 DS 0  
 SWH 7246.377 Hz  
 FIDRES 0.221142 Hz  
 AQ 2.2610421 sec  
 RG 512  
 DM 69.000 usec  
 DE 98.57 usec  
 TE 298.0 K  
 D1 1.0000000 sec  
 P1 4.00 usec  
 DE 98.57 usec  
 SFO1 400.1328371 MHz  
 NUCLEUS 1H

F2 - Processing parameters  
 SI 16384  
 SF 400.1300049 MHz  
 WDW EM  
 SSB 0  
 LB 0.10 Hz  
 GB 0  
 PC 1.00

1D NMR plot parameters  
 CX 20.00 cm  
 F1P 8.198 ppm  
 F1 3280.26 Hz  
 F2P -0.356 ppm  
 F2 -142.35 Hz  
 PPMCH 0.42769 ppm/cm  
 HZCH 171.13057 Hz/cm

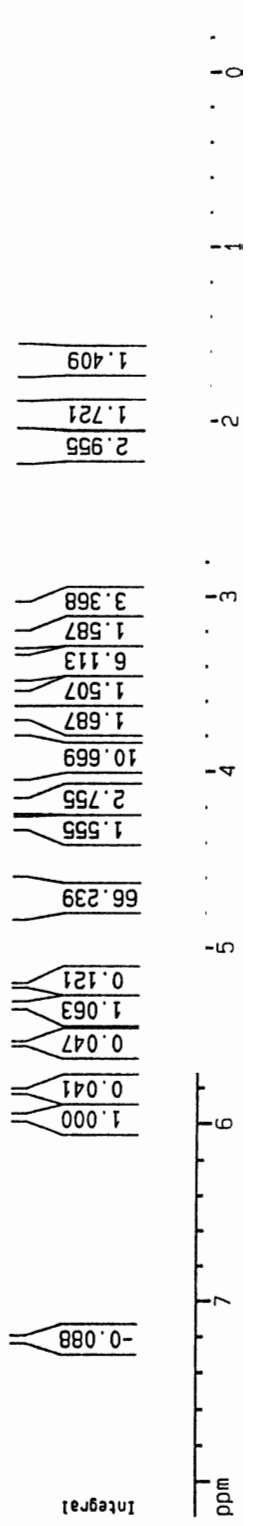

Standard <sup>13</sup>C  
Experiment

5-O-(β-D-ribofuranosyl)-1-N-[(S)-4-amino-2-hydroxybutanoyl]neamine (Butirosin B)

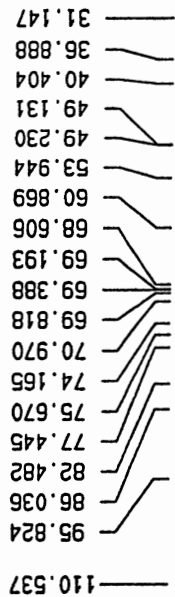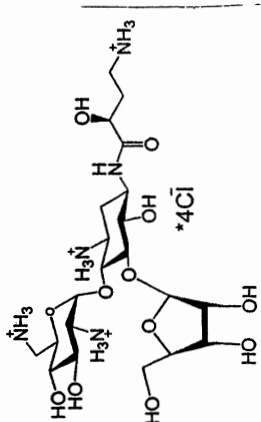

Current Data Parameters  
 NAME 122005-2  
 EXPNO 1  
 PROCNO 1

F2 - Acquisition Parameters  
 Date\_ 500000  
 Time 23.57  
 INSTRUM arx400  
 PROBHD 5 mm Multinucl  
 PULPROG zgpg30  
 TD 32768  
 SOLVENT D2O  
 NS 32768  
 DS 2  
 SMH 25000.000 Hz  
 FIDRES 0.762939 Hz  
 AQ 0.6554100 sec  
 RG 45500  
 DM 20.000 usec  
 DE 27.14 usec  
 TE 300.0 K  
 D12 0.00002000 sec  
 DL5 20.00 dB  
 CPDPRG waltz16  
 P31 100.00 usec  
 D1 0.40000001 sec  
 P1 6.75 usec  
 DE 27.14 usec  
 SFO1 100.6231179 MHz  
 NUCLEUS 13C  
 D11 0.03000000 sec

F2 - Processing parameters  
 SI 16384  
 SF 100.6127490 MHz  
 WDW EM  
 SSB 0  
 LB 2.00 Hz  
 GB 0  
 PC 1.40

1D NMR plot parameters  
 CX 20.00 cm  
 F1P 201.834 ppm  
 F1 20307.06 Hz  
 F2P -8.304 ppm  
 F2 -835.46 Hz  
 PPMCM 10.50688 ppm/cm  
 HZCM 1057.12598 Hz/cm

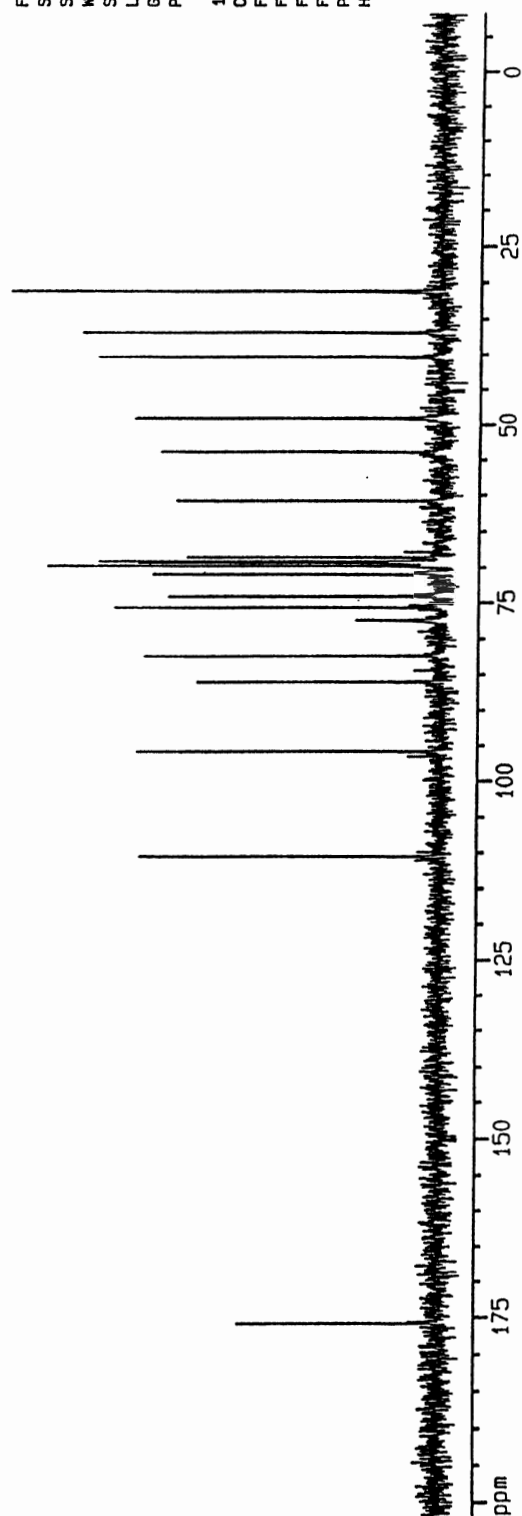

ppm

S58

6-O-(3-Azido-2,4,6-tri-O-benzyl-3-deoxy- $\alpha$ -D-glucopyranosyl)-1-N-(S)-4-(benzyloxycarbonylamino)-2-benzyloxybutanoyl-3,2,6'-  
 triazidoneamine (29a)  
 Standard Proton  
 Experiment

Current Data Parameters  
 NAME 022206-1  
 EXPNO 1  
 PROCNO 1

F2 - Acquisition Parameters

Date\_ 500000  
 Time 17.53  
 INSTRUM arx400  
 PROBHD 5 mm Multinucl  
 PULPROG zg  
 TD 32768  
 SOLVENT CDCl3  
 NS 8  
 DS 0  
 SWH 7246.377 Hz  
 FIDRES 0.221142 Hz  
 AQ 2.2610421 sec  
 RG 128  
 DM 69.000 usec  
 DE 98.57 usec  
 TE 298.0 K  
 D1 1.00000000 sec  
 P1 4.00 usec  
 DE 98.57 usec  
 SFO1 400.1328371 MHz  
 NUCLEUS 1H

F2 - Processing parameters

SI 16384  
 SF 400.1300049 MHz  
 WDW EM  
 SSB 0  
 LB 0.10 Hz  
 GB 0  
 PC 1.00

1D NMR plot parameters  
 CX 20.00 cm  
 F1P 9.073 ppm  
 F1 3630.21 Hz  
 F2P -0.377 ppm  
 F2 -150.88 Hz  
 PPMCM 0.47248 ppm/cm  
 HZCM 189.05446 Hz/cm

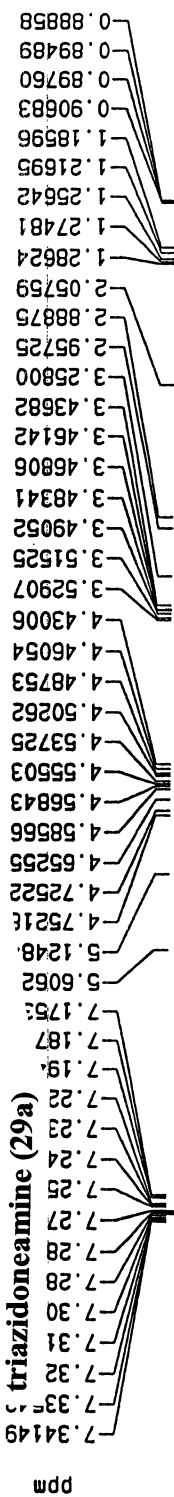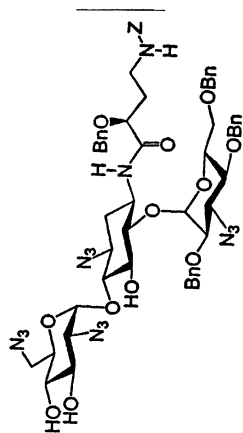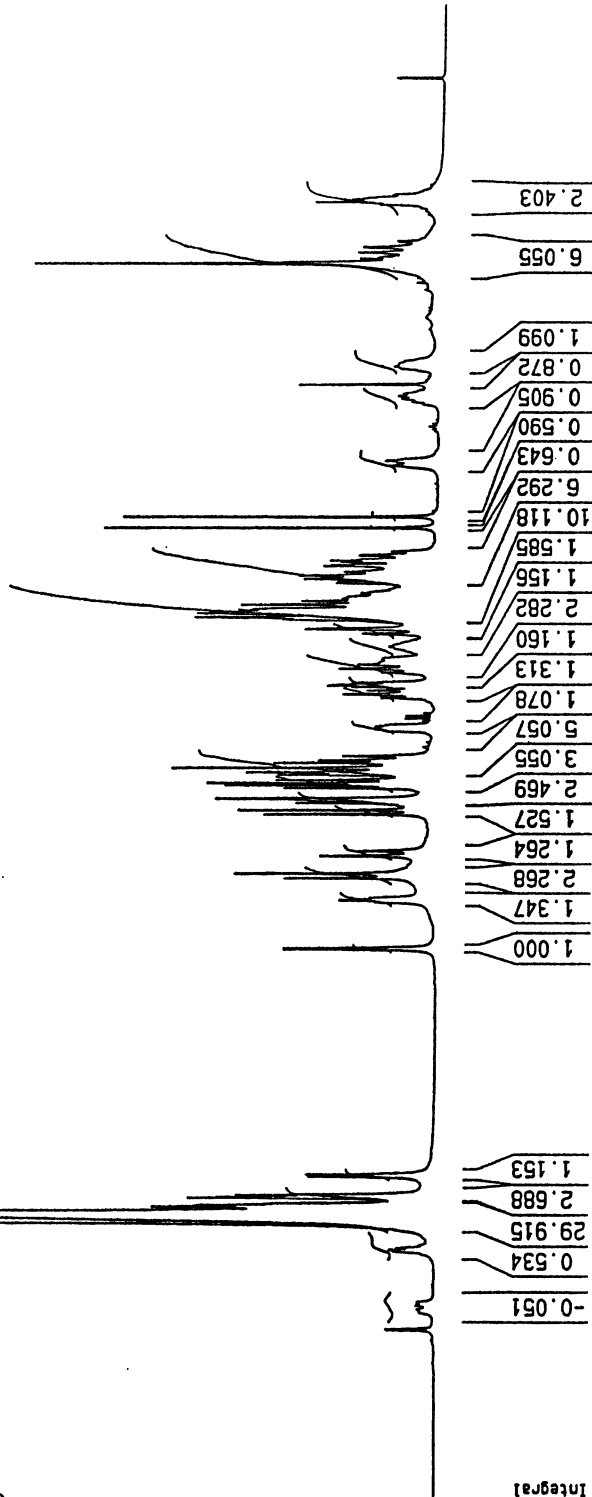

Standard 13C  
Experiment

6-O-(3-Azido-2,4,6-tri-O-benzyl-3-deoxy- $\alpha$ -D-glucopyranosyl)-1-N-[(S)-4-(benzyloxycarbonylamino)-2-benzyloxybutanoyl]-3,2'6'-  
triazidoneamine (29a)

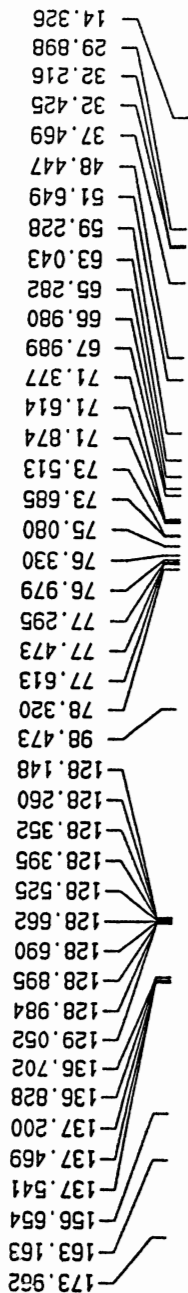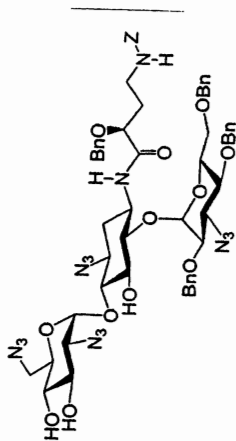

Current Data Parameters  
NAME 022206-2  
EXPNO 1  
PROCNO 1

F2 - Acquisition Parameters

Date\_ 500000  
Time 18.34  
INSTRUM arx400  
PROBHD 5 mm Multinucl  
PULPROG zgpg30  
TD 32768  
SOLVENT COC13  
NS 15220  
DS 2  
SWH 25000.000 Hz  
FIDRES 0.762939 Hz  
AQ 0.6554100 sec  
RG 45500  
DM 20.000 usec  
DE 27.14 usec  
TE 300.0 K  
D12 0.0002000 sec  
DL5 20.00 dB  
CPDPRG waltz16  
P31 100.00 usec  
D1 0.4000001 sec  
P1 6.75 usec  
DE 27.14 usec  
SF01 100.6231179 MHz  
NUCLEUS 13C  
D11 0.03000000 sec

F2 - Processing parameters

SI 16384  
SF 100.6127490 MHz  
WDW EM  
SSB 0  
LB 2.00 Hz  
GB 0  
PC 1.40

ID NMR plot parameters

CX 20.00 cm  
F1P 207.395 ppm  
F1 20866.54 Hz  
F2P -6.255 ppm  
F2 -629.34 Hz  
PPMCM 10.68246 ppm/cm  
HZCM 1074.79382 Hz/cm

6-O-(4-O-((R)-3-Azido-2-((R)-3-azido-2-benzoyloxypropoxy)propyl)-2,3-di-O-benzyl-6-deoxy- $\alpha$ -D-glucopyranosyl)-1-N-(S)-4-

Standard Proton Experiment

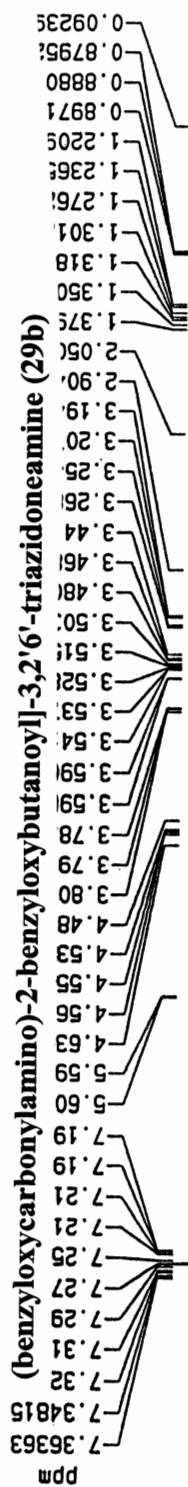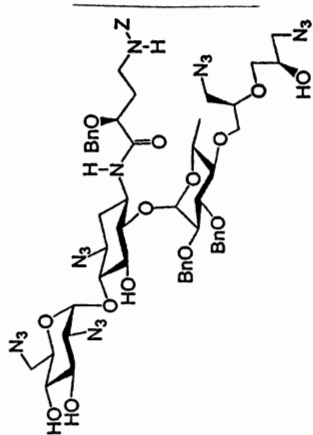

Current Data Parameters  
 NAME 032106-4  
 EXPNO 1  
 PROCNO 1

F2 - Acquisition Parameters  
 Date\_ 500000  
 Time 17.06  
 INSTRUM arx400  
 PROBRD 5 mm Multinucl  
 PULPROG zg  
 TD 32768  
 SOLVENT CDC13  
 NS 8  
 DS 0  
 SWH 7246.377 Hz  
 FIDRES 0.221142 Hz  
 AQ 2.2610421 sec  
 RG 180  
 DM 69.000 usec  
 DE 98.57 usec  
 TE 298.0 K  
 D1 1.0000000 sec  
 P1 4.00 usec  
 DE 98.57 usec  
 SFO1 400.1326371 MHz  
 NUCLEUS  $^1\text{H}$

F2 - Processing parameters  
 SI 16384  
 SF 400.1300049 MHz  
 WDW EM  
 SSB 0  
 LB 0.10 Hz  
 GB 0  
 PC 1.00

1D NMR plot parameters  
 CX 20.00 cm  
 F1P 8.667 ppm  
 F1 3468.04 Hz  
 F2P -0.804 ppm  
 F2 -321.59 Hz  
 PPMCH 0.47355 ppm/cm  
 HZCM 189.48123 Hz/cm

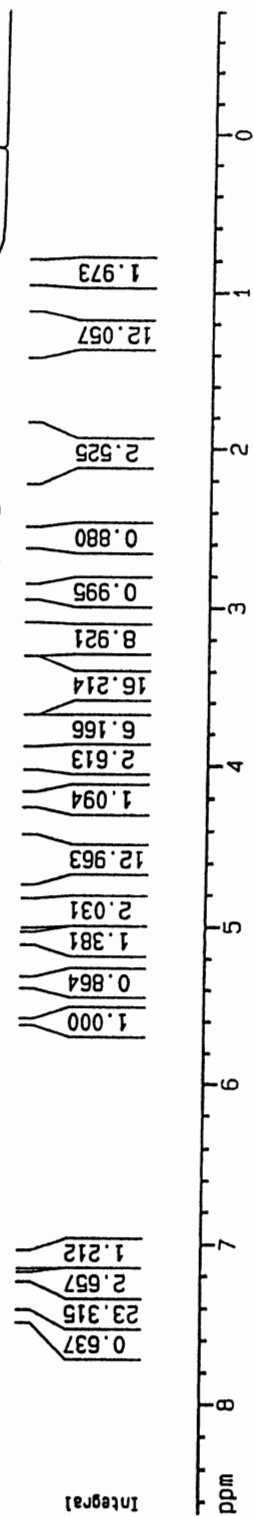

**6-O-(4-O-(R)-3-Azido-2-(R)-3-azido-2-benzoyloxypropoxypropyl)-2,3-di-O-benzyl-6-deoxy- $\alpha$ -D-glucopyranosyl)-1-N-(S)-4-(benzyloxycarbonylamino)-2-benzoyloxybutanoyl]-3,2'6'-triazidoneamine (29b)**

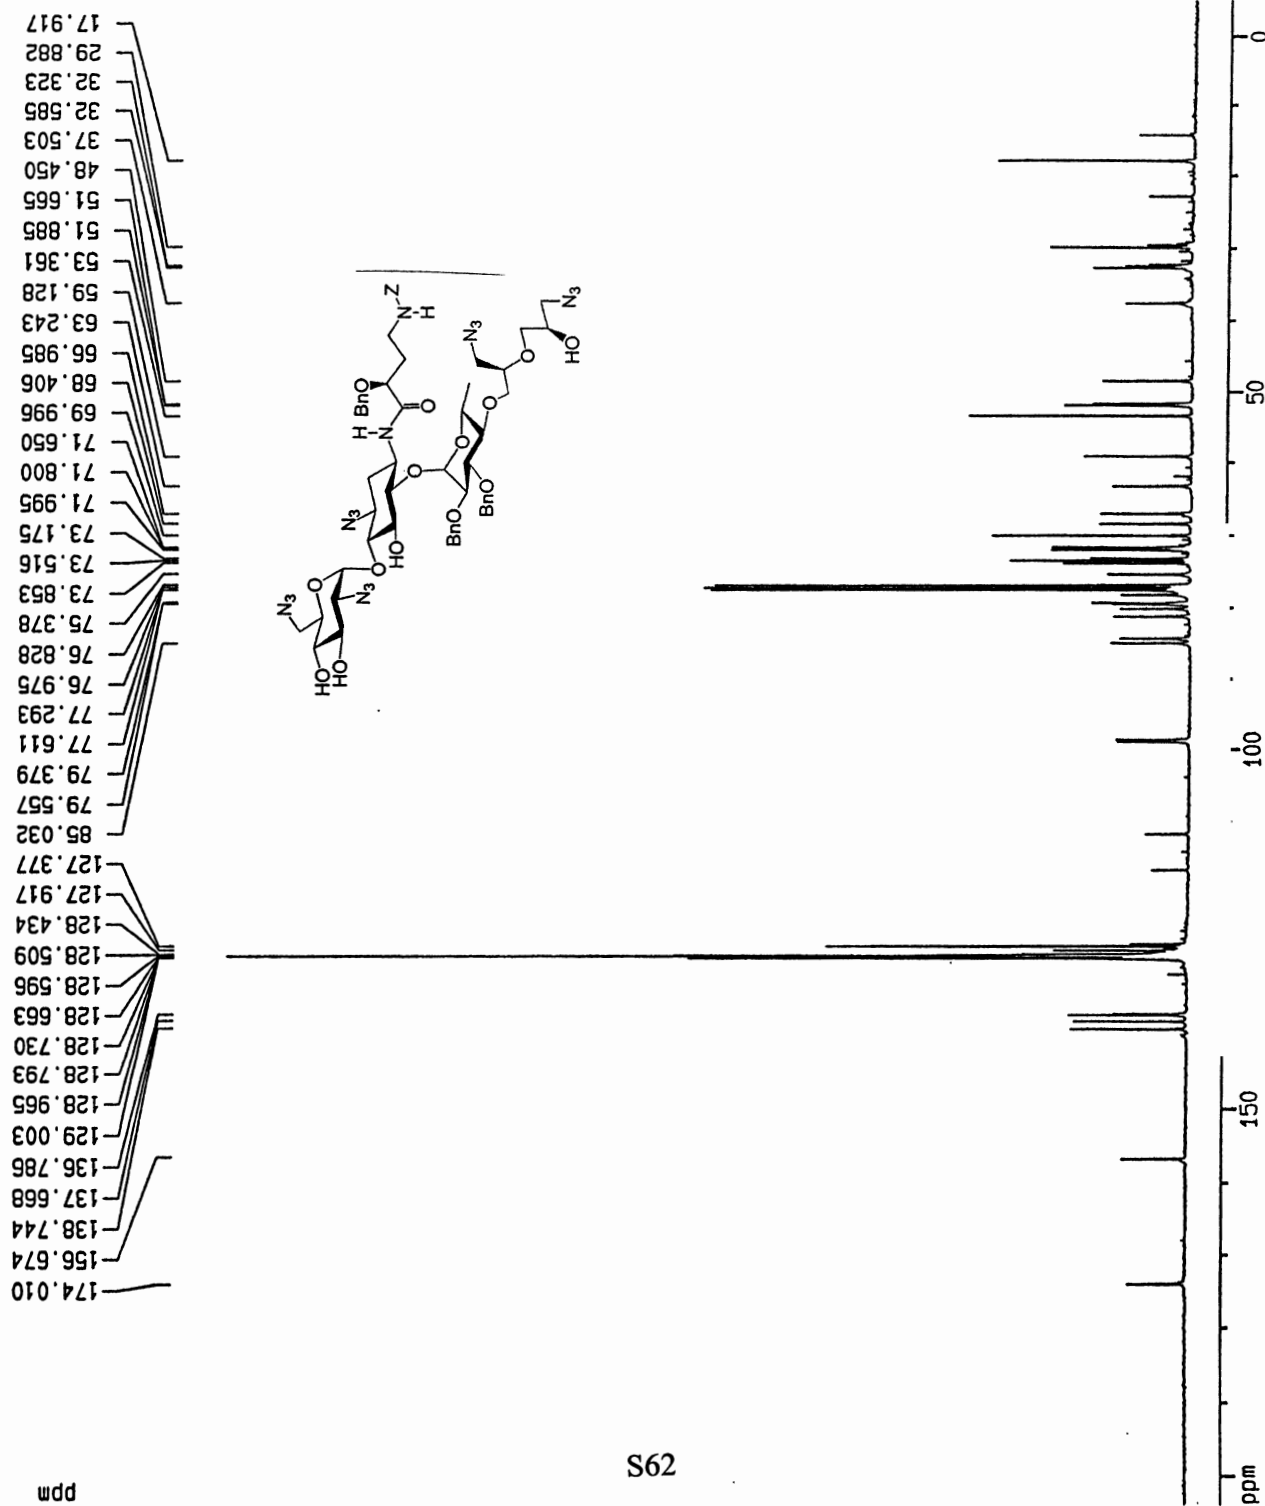

Current Data Parameters  
 NAME 032106-7  
 EXPNO 1  
 PROCNO 1

F2 - Acquisition Parameters

Date\_ 500000  
 Time 19.26  
 INSTRUM arx400  
 PROBHD 5 mm Multinucl  
 PULPROG zgpg30  
 TD 32768  
 SOLVENT CDC13  
 NS 40000  
 DS 2  
 SWH 25000.000 Hz  
 FIDRES 0.762939 Hz  
 AQ 0.6554100 sec  
 RG 45500  
 DM 20.000 usec  
 DE 27.14 usec  
 TE 300.0 K  
 D12 0.00002000 sec  
 DLS 20.00 dB  
 CPDPRG Waltz16  
 P31 100.00 usec  
 D1 0.40000001 sec  
 P1 6.75 usec  
 DE 27.14 usec  
 SF01 100.6231179 MHz  
 NUCLEUS 13C  
 D11 0.03000000 sec

F2 - Processing parameters

SI 16384  
 SF 100.6127490 MHz  
 WDW EM  
 SSB 0  
 LB 2.00 Hz  
 GB 0  
 PC 1.40

1D NMR plot parameters

CX 20.00 cm  
 F1P 203.883 ppm  
 F1 20513.18 Hz  
 F2P -5.084 ppm  
 F2 -511.55 Hz  
 PPHCM 10.44835 ppm/cm  
 HZCM 1051.23669 Hz/cm

6-O-(3-Azido-2,4-di-O-benzyl-3-deoxy- $\alpha$ -D-xylopyranosyl)-1-N-[(S)-4-(benzyloxycarbonylamino)-2-benzyloxybutanoyl]-3,2,6'-  
 triazidoneamine (29c)

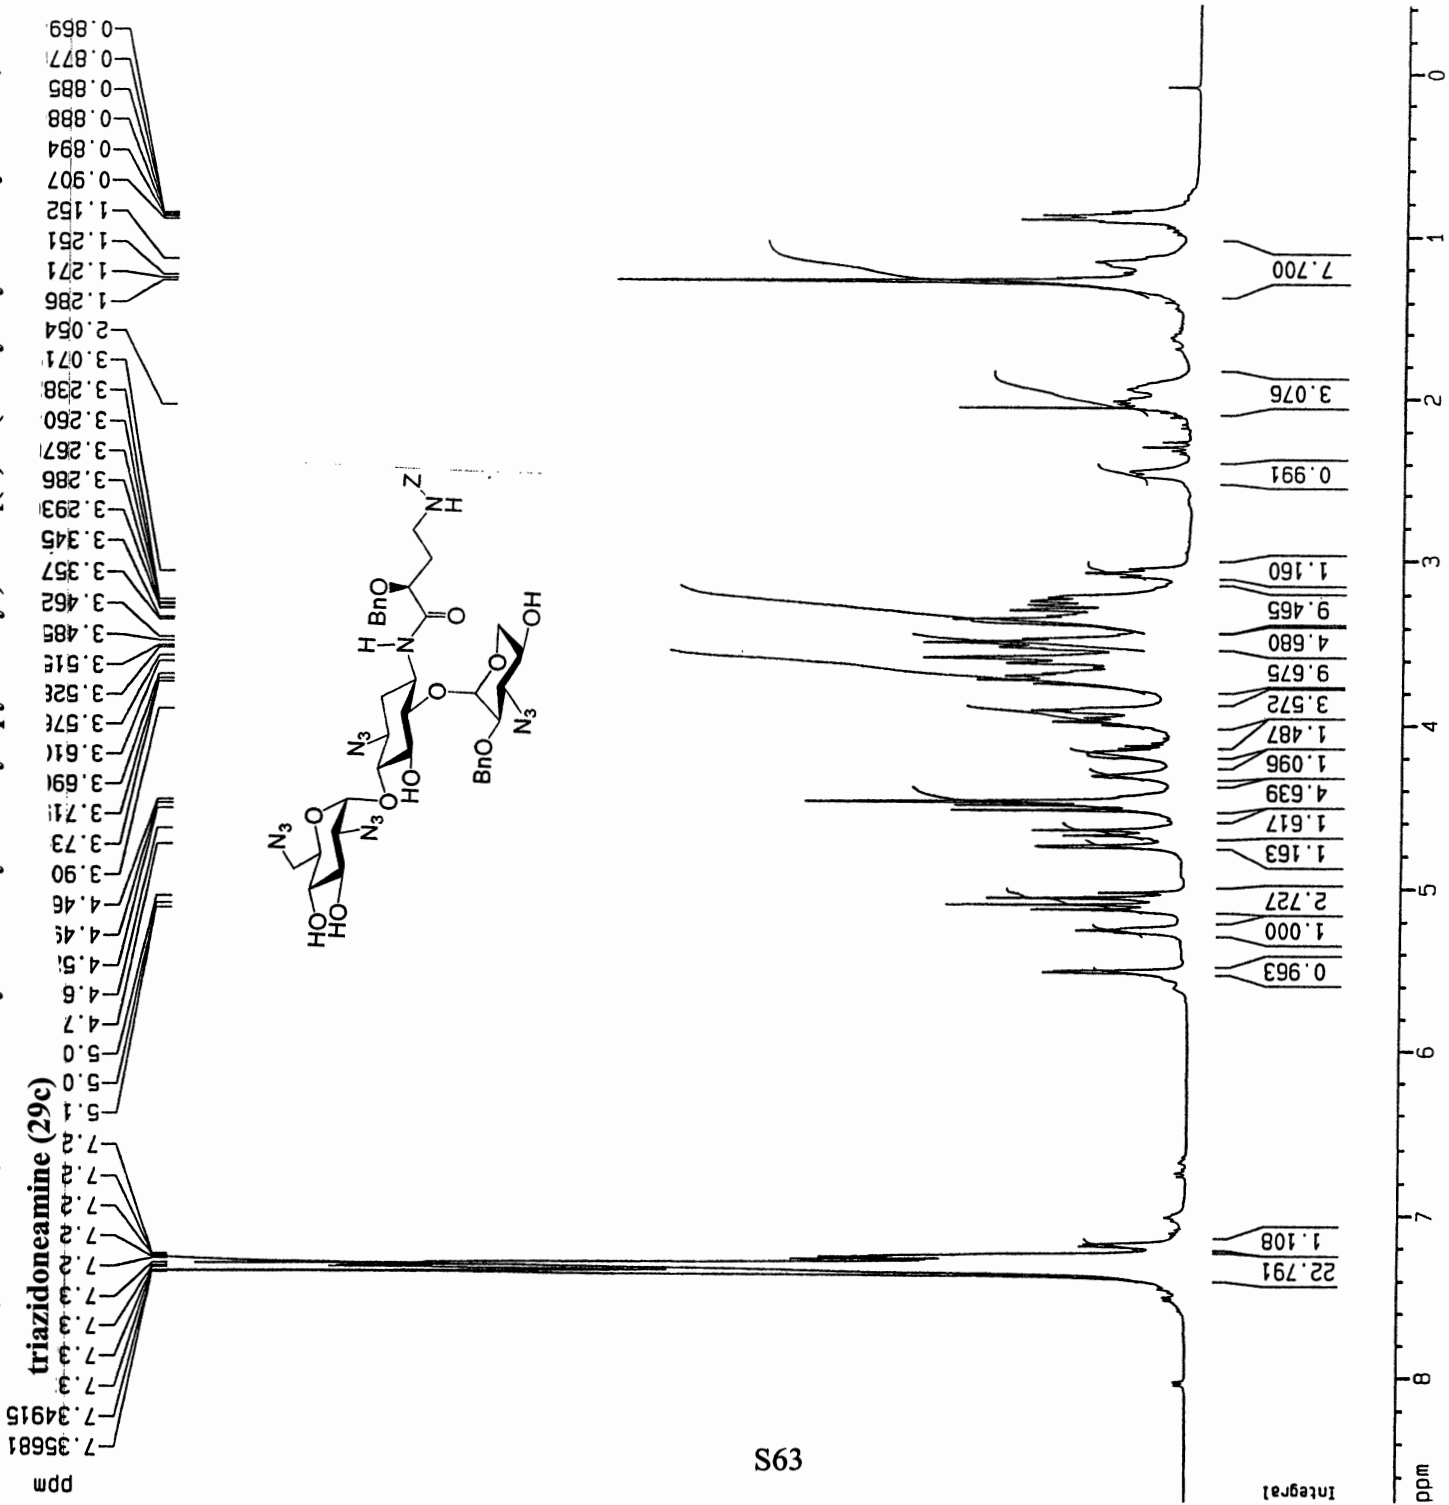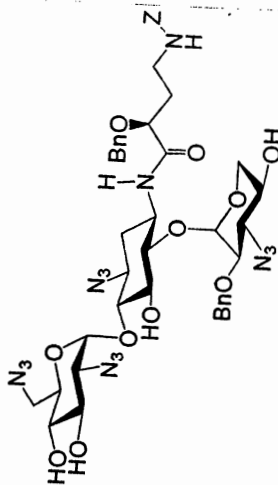

Current Data Parameters  
 NAME 081006-6  
 EXPNO 1  
 PROCNO 1

F2 - Acquisition Parameters  
 Date\_ 500000  
 Time 19.00  
 INSTRUM arx400  
 PROBHD 5 mm Multinucl  
 PULPROG zg  
 TD 32768  
 SOLVENT CDCl3  
 NS 8  
 DS 0  
 SMH 7246.377 Hz  
 FIDRES 0.221142 Hz  
 AQ 2.2610421 sec  
 RG 256  
 DW 69.000 usec  
 DE 98.57 usec  
 TE 298.0 K  
 D1 1.00000000 sec  
 P1 4.00 usec  
 DE 98.57 usec  
 SFO1 400.1326371 MHz  
 NUCLEUS 1H

F2 - Processing parameters  
 SI 16384  
 SF 400.1300049 MHz  
 MDM EM  
 SSB 0  
 LB 0.10 Hz  
 GB 0  
 PC 1.00

1D NMR plot parameters  
 CX 20.00 cm  
 F1P 8.750 ppm  
 F1 3501.23 Hz  
 F2P -0.424 ppm  
 F2 -169.49 Hz  
 PPMCH 0.45869 ppm/cm  
 HZCM 183.53587 Hz/cm

**6-O-(3-Azido-2,4-di-O-benzyl-3-deoxy- $\alpha$ -D-xylopyranosyl)-1-N-[(S)-4-(benzyloxycarbonylamino)-2-benzyloxybutanoyl]-3,2'6'-  
 triazidoneamine (29c)**

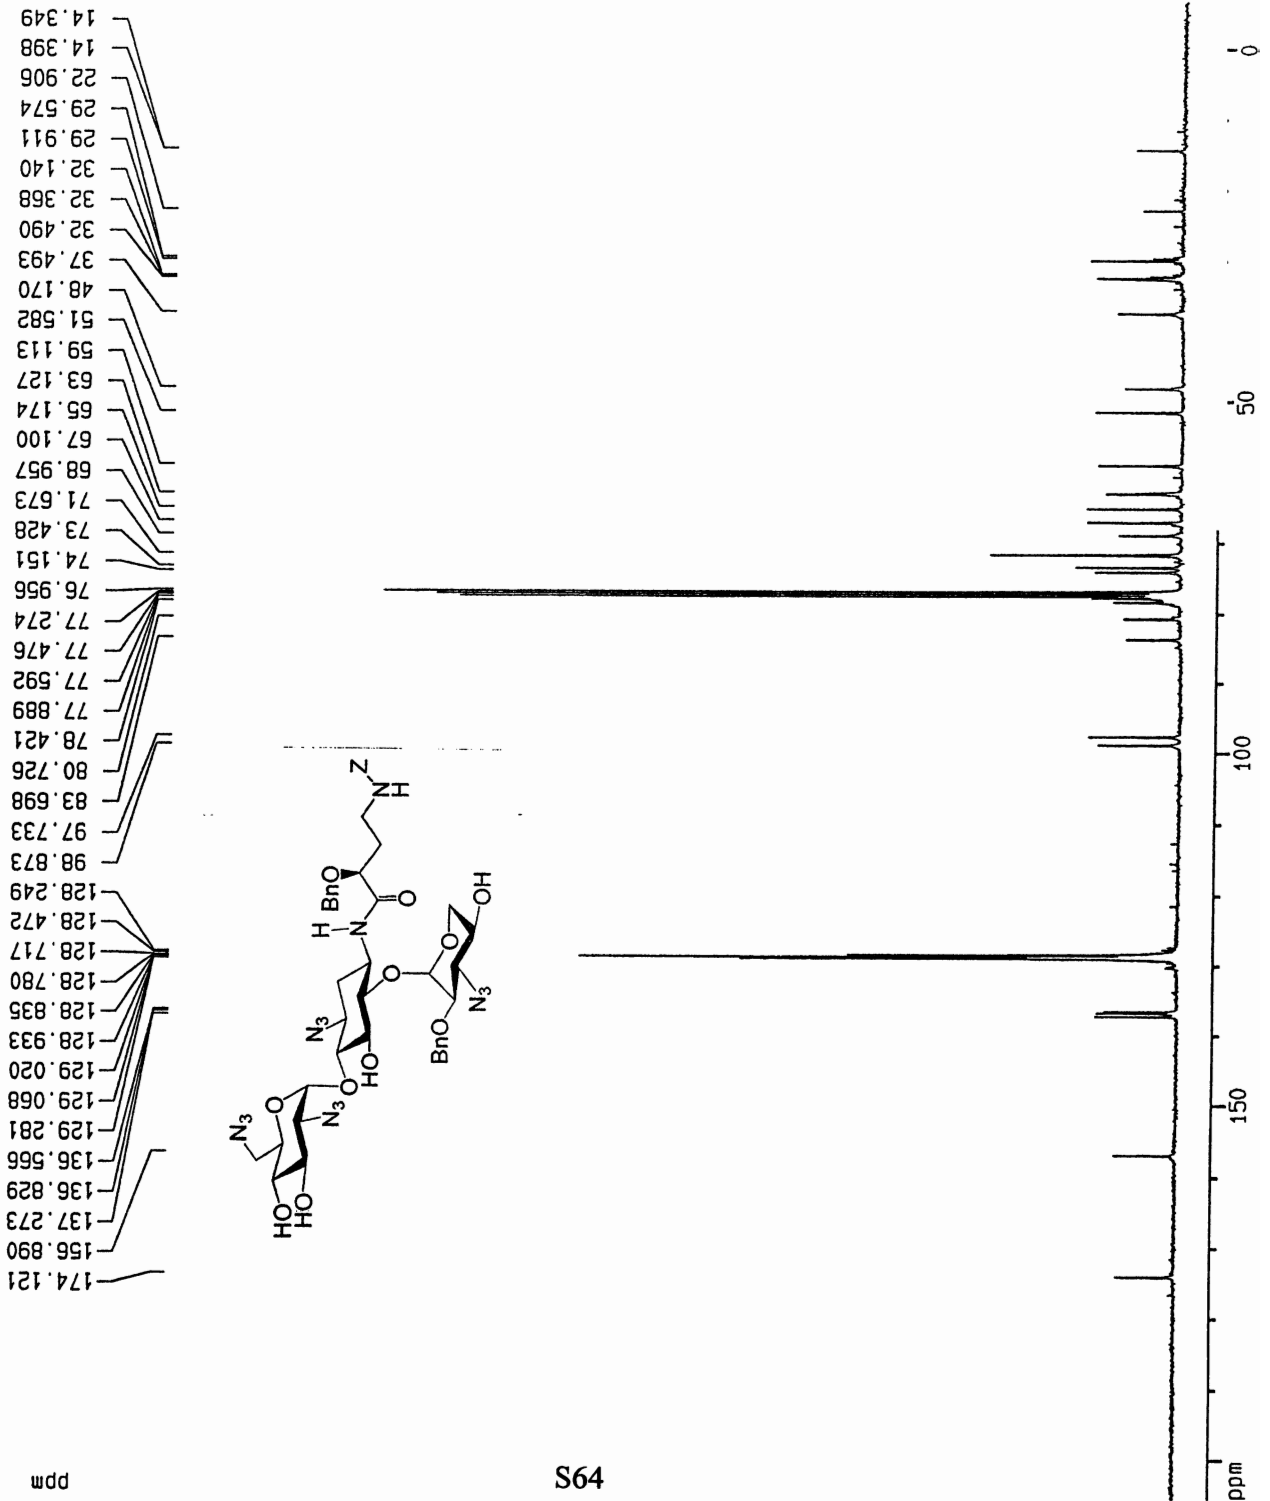



6-O-(3-Amino-3-deoxy-β-D-glucopyranosyl)-1-N-[(S)-4-amino-2-hydroxybutanoyl]neamine (JLN007)

Standard Proton Experiment

Current Data Parameters  
 NAME 030406-2  
 EXPNO 1  
 PROCNO 1

F2 - Acquisition Parameters  
 Date\_ 500000  
 Time 18.22  
 INSTRUM arx400  
 PROBHD 5 mm Multinuc1  
 PULPROG zg  
 TD 32768  
 SOLVENT D2O  
 NS 8  
 DS 0  
 SMH 7246.377 Hz  
 FIDRES 0.221142 Hz  
 AQ 2.2610421 sec  
 RG 256  
 DM 69.000 usec  
 DE 98.57 usec  
 TE 298.0 K  
 D1 1.00000000 sec  
 P1 4.00 usec  
 DE 96.57 usec  
 SFO1 400.1326371 MHz  
 NUCLEUS 1H

F2 - Processing parameters  
 SI 16384  
 SF 400.1300049 MHz  
 WDW EM  
 SSB 0  
 LB 0.10 Hz  
 GB 0  
 PC 1.00

1D NMR plot parameters  
 CX 20.00 cm  
 F1P 8.923 ppm  
 F1 3570.46 Hz  
 F2P -0.420 ppm  
 F2 -167.96 Hz  
 PPMCM 0.46715 ppm/cm  
 HZCM 186.92070 Hz/cm

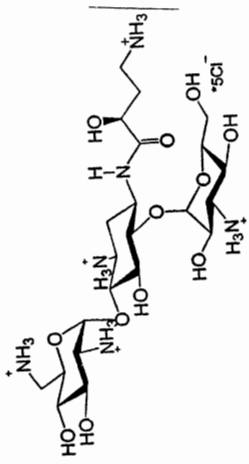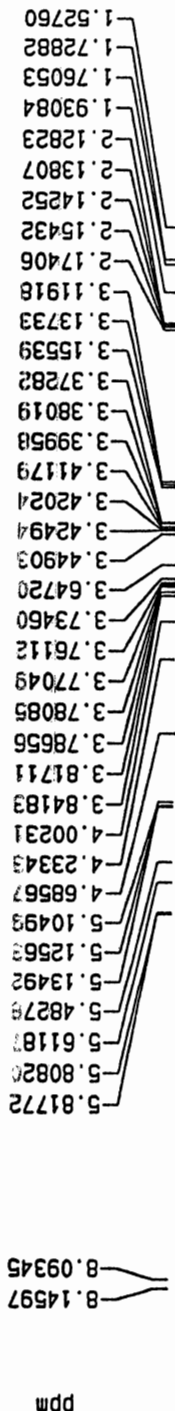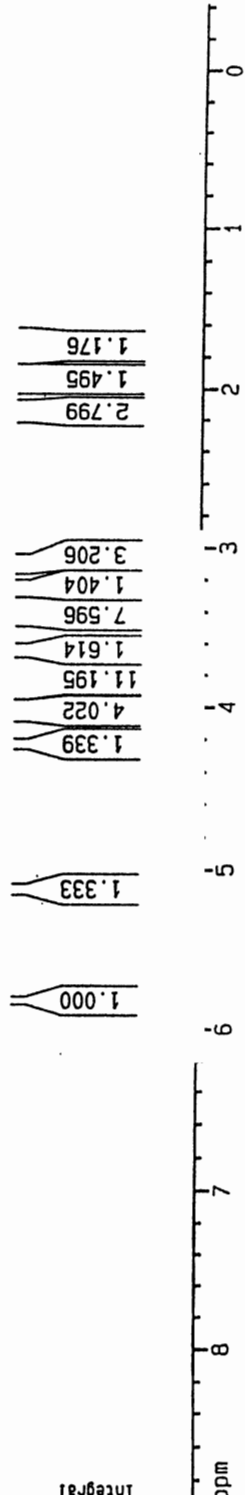

Standard 13C  
Experiment

6-O-(3-Amino-3-deoxy-β-D-glucopyranosyl)-1-N-(S)-4-amino-2-hydroxybutanoyl]neamine (JLN007)

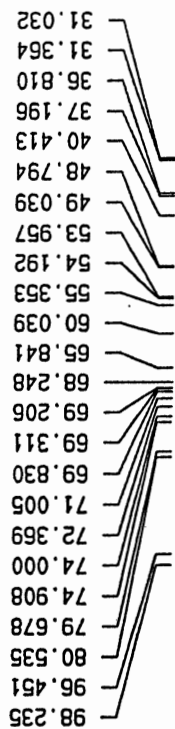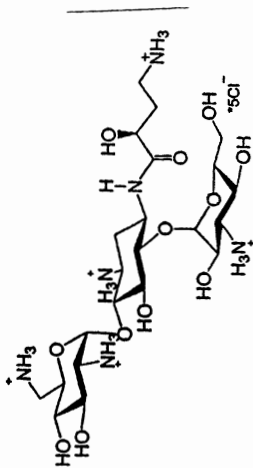

Current Data Parameters  
NAME 030406-3  
EXPNO 1  
PROCNO 1

F2 - Acquisition Parameters  
Date\_ 500000  
Time 21.36  
INSTRUM arx400  
PROBHD 5 mm Multinuc1  
PULPROG zgpg30  
TD 32768  
SOLVENT D2O  
NS 40000  
DS 2  
SWH 25000.000 Hz  
FIDRES 0.762939 Hz  
AQ 0.16554100 sec  
RG 45500  
DM 20.000 usec  
DE 27.14 usec  
TE 300.0 K  
D12 0.00002000 sec  
DL5 20.00 dB  
CPDPRG waltz16  
P31 100.00 usec  
D1 0.40000001 sec  
P1 6.75 usec  
DE 27.14 usec  
SF01 100.6231179 MHz  
NUCLEUS 13C  
D11 0.03000000 sec

F2 - Processing parameters  
SI 16384  
SF 100.6127490 MHz  
MCM EM  
SSB 0  
LB 2.00 Hz  
GB 0  
PC 1.40

1D NMR plot parameters  
CX 20.00 cm  
F1P 227.296 ppm  
F1 22868.89 Hz  
F2P -21.181 ppm  
F2 -2131.10 Hz  
PPMCM 12.42387 ppm/cm  
HZCM 1249.99988 Hz/cm

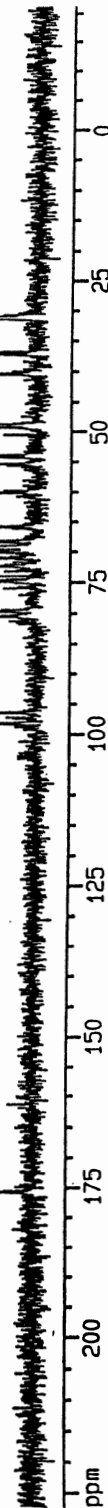

6-O-(4-O-((R)-3-Amino-2-((R)-3-Amino-2-hydroxypropoxy)propyl)-6-deoxy- $\alpha$ -D-glucopyranosyl)-1-N-(S)-4-amino-2-

hydroxybutanoyl]neamine (JLN033)

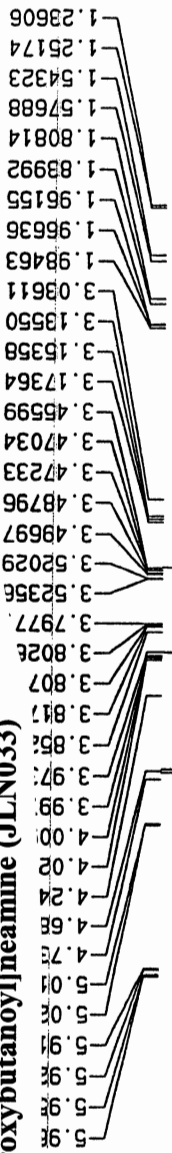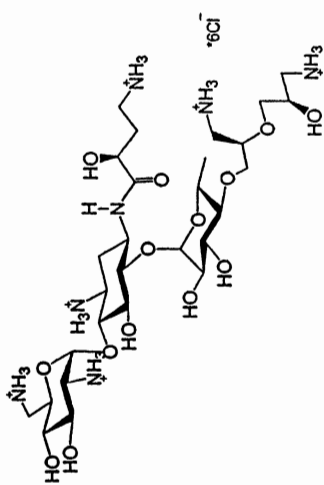

Standard Proton Experiment

Current Data Parameters  
 NAME 051006-1  
 EXPNO 1  
 PROCNO 1

F2 - Acquisition Parameters  
 Date\_ 500000  
 Time 11.53  
 INSTRUM arx400  
 PROBHD 5 mm Multinucl  
 PULPROG zg  
 TD 32768  
 SOLVENT D2O  
 NS 8  
 DS 0  
 SWH 7246.377 Hz  
 FIDRES 0.221142 Hz  
 AQ 2.2610421 sec  
 RG 360  
 DW 69.000 usec  
 DE 98.57 usec  
 TE 298.0 K  
 D1 1.00000000 sec  
 P1 4.00 usec  
 DE 98.57 usec  
 SFO1 400.1328371 MHz  
 NUCLEUS 1H

F2 - Processing parameters  
 SI 16384  
 SF 400.1300049 MHz  
 MDM EM  
 SSB 0  
 LB 0.10 Hz  
 GB 0  
 PC 1.00

1D NMR plot parameters  
 CX 20.00 cm  
 F1P 8.625 ppm  
 F1 3450.97 Hz  
 F2P -0.569 ppm  
 F2 -227.70 Hz  
 PPMCH 0.45968 ppm/cm  
 HZCM 183.93336 Hz/cm

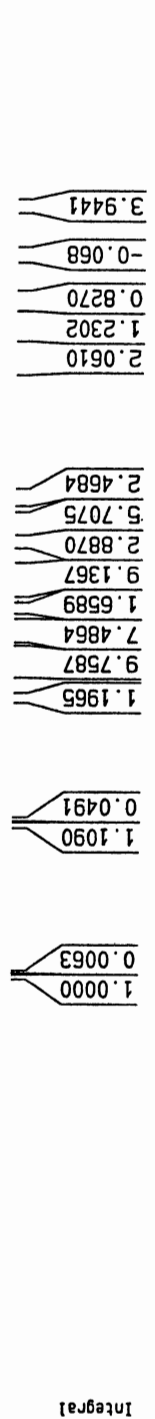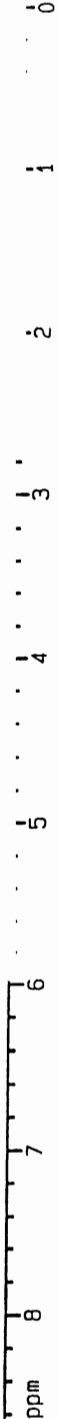

**6-O-(4-O-((R)-3-Amino-2-((R)-3-Amino-2-hydroxypropoxy)propyl)-6-deoxy- $\alpha$ -D-glucopyranosyl)-1-N-[(S)-4-amino-2-hydroxybutanoyl]neamine (JLN033)**

**Standard  $^{13}\text{C}$  Experiment**

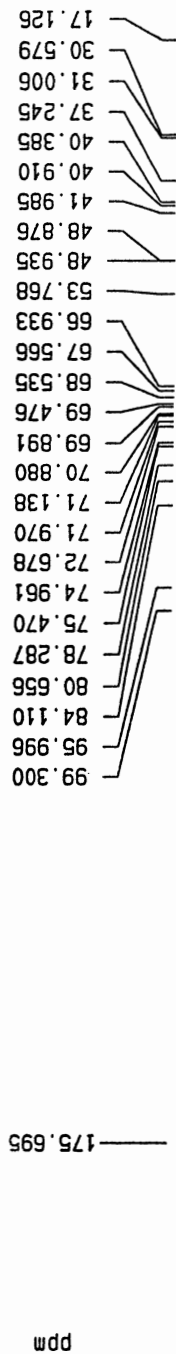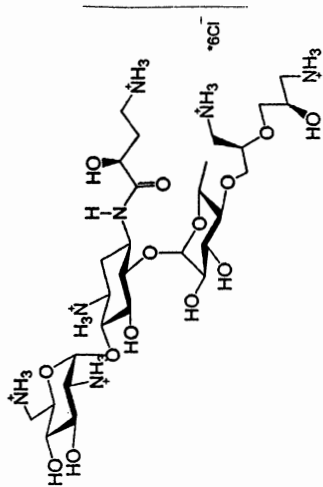

Current Data Parameters  
 NAME 051006-6  
 EXPNO 1  
 PROCNO 1

F2 - Acquisition Parameters  
 Date\_ 500000  
 Time 23.04  
 INSTRUM arx400  
 PROBHD 5 mm Multinucl  
 PULPROG zgdc30  
 TD 32768  
 SOLVENT D2O  
 NS 20000  
 DS 2  
 SWH 25000.000 Hz  
 FIDRES 0.762939 Hz  
 AQ 0.6554100 sec  
 RG 45500  
 DW 20.000 usec  
 DE 27.14 usec  
 TE 300.0 K  
 D12 0.00002000 sec  
 DL5 20.00 dB  
 CPDPRG waltz16  
 P31 100.00 usec  
 D1 0.40000001 sec  
 P1 6.75 usec  
 DE 27.14 usec  
 SF01 100.6231179 MHz  
 NUCLEUS  $^{13}\text{C}$   
 D11 0.03000000 sec

F2 - Processing parameters  
 SI 16384  
 SF 100.5127490 MHz  
 WDW EM  
 SSB 0  
 LB 2.00 Hz  
 GB 0  
 PC 1.40

1D NMR plot parameters  
 CX 20.00 cm  
 F1P 206.069 ppm  
 F1 20733.22 Hz  
 F2P -9.694 ppm  
 F2 -975.32 Hz  
 PPMCH 10.76817 ppm/cm  
 HZCM 1085.42712 Hz/cm

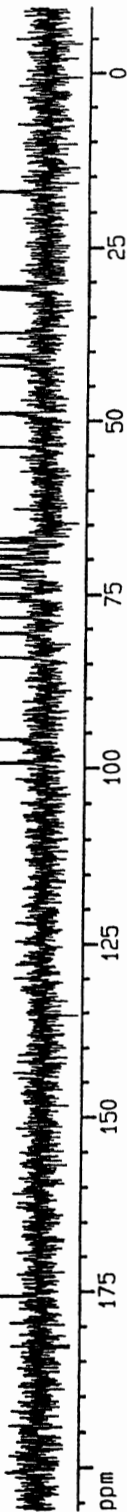

6-O-(3-Amino-3-deoxy- $\alpha$ -D-xylopyranosyl)-1-N-[(S)-4-amino-2-hydroxybutanoyl]neamine (JLN040)

Standard Proton Experiment

Current Data Parameters  
 NAME 092006-5  
 EXPNO 1  
 PROCNO 1

F2 - Acquisition Parameters  
 Date\_ 500000  
 Time 15.29  
 INSTRUM arx400  
 PROBHD 5 mm Multinuc1  
 PULPROG zg  
 TD 32768  
 SOLVENT D2O  
 NS 8  
 DS 0  
 SWH 7246.377 Hz  
 FIDRES 0.221142 Hz  
 AQ 2.2610421 sec  
 RG 360  
 DW 69.000 usec  
 DE 98.57 usec  
 TE 298.0 K  
 D1 1.00000000 sec  
 P1 4.00 usec  
 DE 98.57 usec  
 SFO1 400.1328371 MHz  
 NUCLEUS 1H

F2 - Processing parameters  
 SI 16384  
 SF 400.1300049 MHz  
 WDM EM  
 SSB 0  
 LB 0.10 Hz  
 GB 0  
 PC 1.00

1D NMR plot parameters  
 CX 20.00 cm  
 F1P 8.230 ppm  
 F1 3292.88 Hz  
 F2P -0.387 ppm  
 F2 -154.99 Hz  
 PPMCH 0.43084 ppm/cm  
 HZCM 172.39346 Hz/cm

5.81823  
5.80867  
5.03070  
5.02136  
4.99653  
4.68202  
4.52823  
4.17681  
4.16268  
3.90819  
3.88143  
3.85794  
3.76909  
3.76040  
3.74277  
3.68535  
3.65823  
3.64889  
3.41709  
3.39360  
3.38690  
3.36959  
3.36224  
3.35355  
3.22579  
3.08262  
3.06453  
3.04645  
2.13340  
2.10141  
2.09162  
2.04828  
2.03889  
1.85276  
1.72417  
1.69242  
1.45941

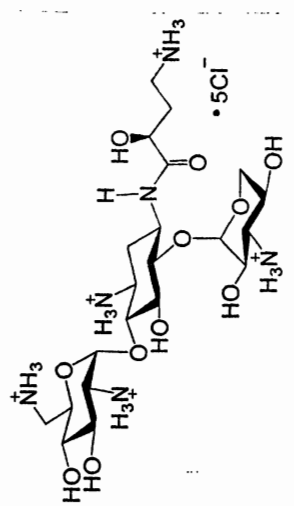

1.0000  
1.0590  
0.9990  
1.0024  
3.5669  
4.2389  
2.3689  
4.6240  
2.1368  
2.2480  
0.1455  
1.9996  
1.0921  
1.1970

Integral

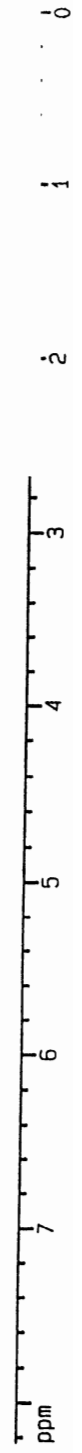

Standard <sup>13</sup>C  
Experiment

6-O-(3-Amino-3-deoxy-α-D-xylopyranosyl)-1-N-(S)-4-amino-2-hydroxybutanoyl]neamine (JLN040)

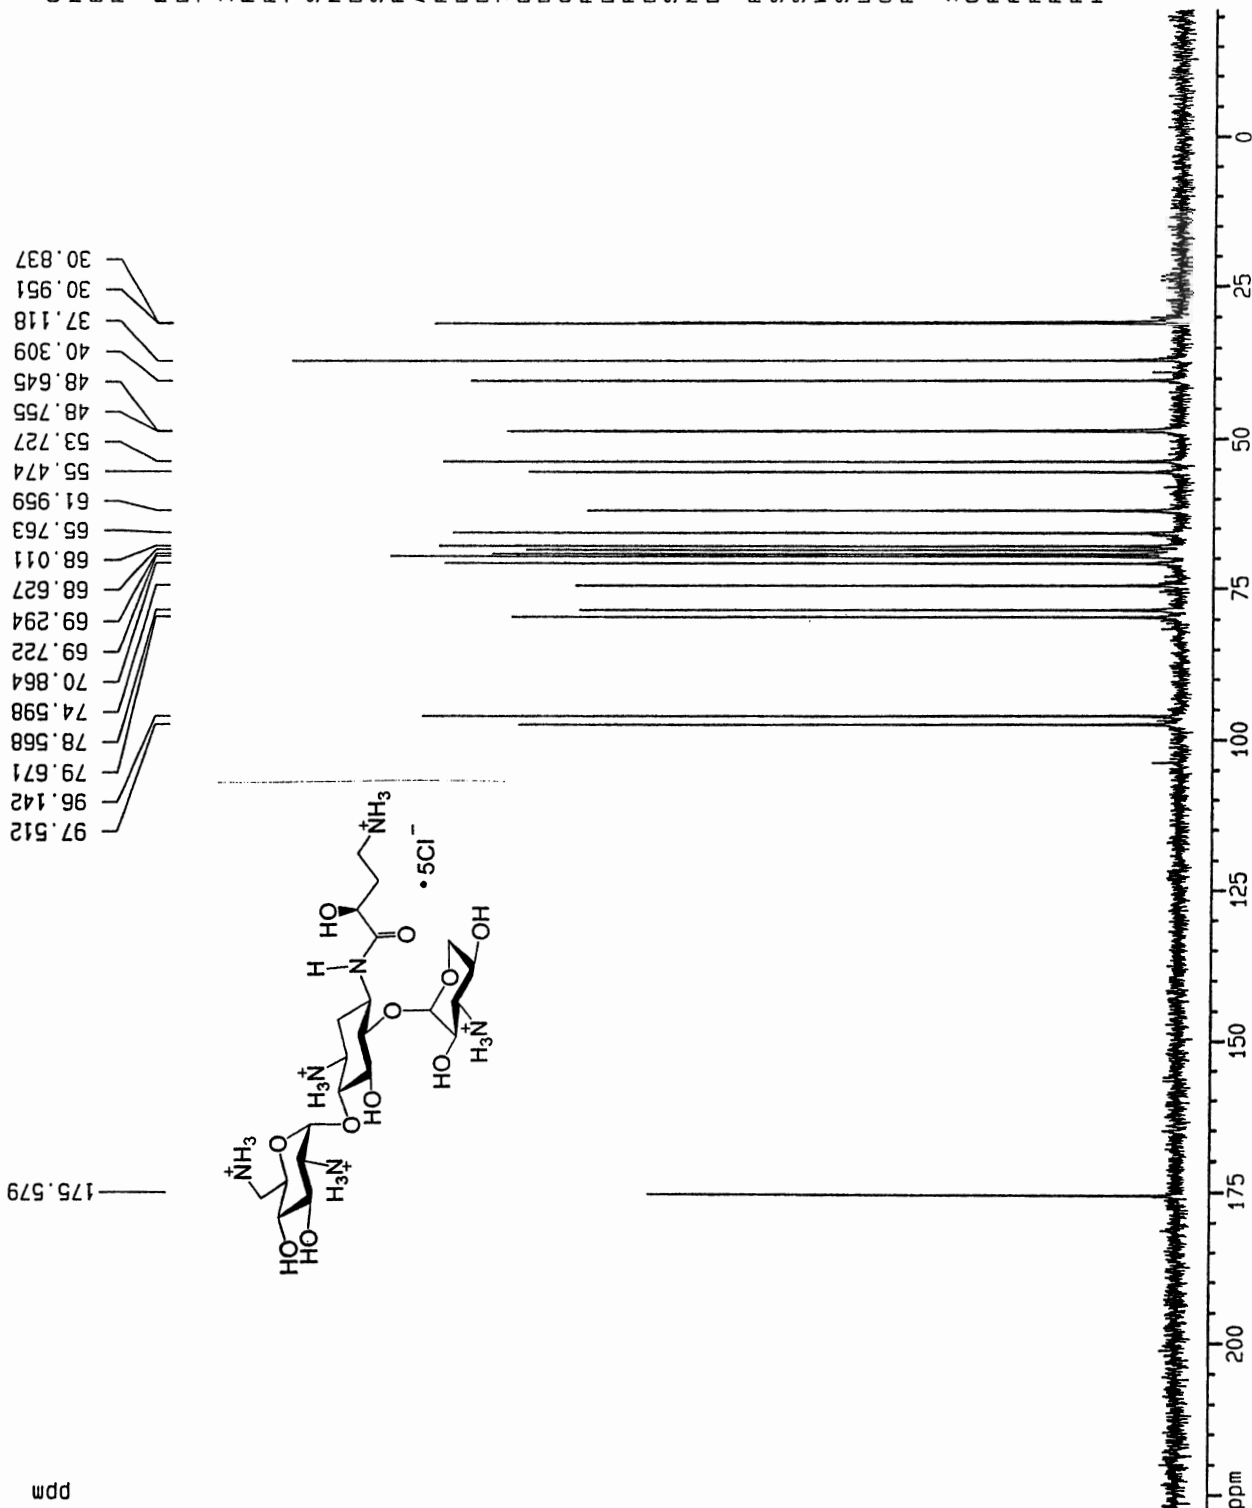

Current Data Parameters  
 NAME 092306-1  
 EXPNO 1  
 PROCNO 1

F2 - Acquisition Parameters  
 Date\_ 500000  
 Time 22.54  
 INSTRUM arx400  
 PROBHD 5 mm Multinuc1  
 PULPROG zgdc30  
 TD 32768  
 SOLVENT D2O  
 NS 30000  
 DS 2  
 SMH 25000.000 Hz  
 FIDRES 0.762939 Hz  
 AQ 0.6554100 sec  
 RG 45500  
 DW 20.000 usec  
 DE 27.14 usec  
 TE 300.0 K  
 D12 0.00002000 sec  
 DLS 20.00 dB  
 CPDPRG waltz16  
 P31 100.00 usec  
 D1 0.40000001 sec  
 P1 6.75 usec  
 DE 27.14 usec  
 SF01 100.6231179 MHz  
 NUCLEUS <sup>13</sup>C  
 D11 0.03000000 sec

F2 - Processing parameters  
 SI 16384  
 SF 100.6127490 MHz  
 MDW EM  
 SSB 0  
 LB 2.00 Hz  
 GB 0  
 PC 1.40

1D NMR plot parameters  
 CX 20.00 cm  
 F1P 227.295 ppm  
 F1 22868.89 Hz  
 F2P -21.181 ppm  
 F2 -2131.11 Hz  
 PPMCM 12.42387 ppm/cm  
 HZCM 1250.00012 Hz/cm
